# Supplementary material for: Concurrent visual sequence learning
Source: Springer Nature journal article supplement (doi:10.1007/s00426-023-01810-2), 2023-03-22
Supplement: MOESM2 [file 24664062]

## Experiment 1 Data Legend

This document belongs to the article “Concurrent Visual Sequence Learning” by Sarah Wilts and Hilde Haider (sarah.wilts@uni-koeln.de, University of Cologne) submitted to the journal Psychological Research.

In this document the variable names and levels of the Excel file „Experiment1\_data set“ are explained. The Excel file contains the raw data set of the test phase of the artificial grammar learning experiment.

|                           |                                                                                                                                                                                                                                                                  |
|---------------------------|------------------------------------------------------------------------------------------------------------------------------------------------------------------------------------------------------------------------------------------------------------------|
| subject_number            | The numbers of the subjects from 1 to 44 including the participants 14 and 16 that were distracted during the experiment and therefore, excluded from data analyses.                                                                                             |
| trainmat                  | In condition 1, the color vocabulary was assigned to the grammar 1 and the shape vocabulary to grammar 2.<br><br>In condition 2, the shape vocabulary was assigned to grammar 1 and the color vocabulary to grammar 2.                                           |
| testmat                   | In condition 1, the participants conducted a color-test.<br><br>In condition 2, the participants conducted a shape-test.                                                                                                                                         |
| trial                     | The test phase contained 20 trials.                                                                                                                                                                                                                              |
| grammar                   | The test string was either derived from grammar 1 or grammar 2.                                                                                                                                                                                                  |
| string                    | This column indicates the number of the exact string that was tested in the respective trial. In total, 20 strings were tested in random order.                                                                                                                  |
| position1 to<br>position7 | These columns present the single elements (colors or shapes) of the test strings. The strings contained between three and seven elements.<br><br>The numbers 1 to 5 indicate which element was displayed. A zero indicates that the string was already finished. |
| response                  | The participants indicated whether the sequence was grammatical (yes = 1) or ungrammatical (no = 0).                                                                                                                                                             |

|                            |                                                                                                                                                                 |
|----------------------------|-----------------------------------------------------------------------------------------------------------------------------------------------------------------|
| response_time              | The computer measured the response time in seconds.                                                                                                             |
| color_hit                  | The participants' judgments were scored as correct (1), when they classified a color test string as grammatical that was derived from the color-grammar.        |
| color_<br>correctrejection | The participants' judgments were also scored as correct (1), when they classified a color test string as ungrammatical that was derived from the shape-grammar. |
| shape_hit                  | The participants' judgments were scored as correct (1), when they classified a shape test string as grammatical that was derived from the shape-grammar.        |
| shape_<br>correctrejection | The participants' judgments were also scored as correct (1), when they classified a shape test string as ungrammatical that was derived from the color-grammar. |
| explicit_color             | The participants' score of explicit color knowledge. Higher scores indicate higher amounts of explicit color knowledge.                                         |
| explicit_shape             | The participants' score of explicit shape knowledge. Higher scores indicate higher amounts of explicit shape knowledge.                                         |
