# Supplementary material for: Concurrent visual sequence learning
Source: Springer Nature journal article supplement (doi:10.1007/s00426-023-01810-2), 2023-03-22
Supplement: MOESM5 [file 24664062]

## Experiment 2 – Test – Data Legend

This document belongs to the article “Concurrent Visual Sequence Learning” by Sarah Wilts and Hilde Haider (sarah.wilts@uni-koeln.de, University of Cologne) submitted to the journal Psychological Research.

In this document the variable names and levels of the Excel file „Experiment2\_test\_data set“ are explained. The Excel file contains the raw data set of the test phase of the serial reaction time task: the post decision wagering task.

|                  |                                                                                                                                                                                                                                                                                                                                                               |
|------------------|---------------------------------------------------------------------------------------------------------------------------------------------------------------------------------------------------------------------------------------------------------------------------------------------------------------------------------------------------------------|
| subject_number   | The numbers of the subjects from 1 to 64. The data of the participants 48 and 58 were not recorded due to technical issues.                                                                                                                                                                                                                                   |
| condition        | The participants were randomly assigned to the color-test condition (1) or the shape-test condition (2).                                                                                                                                                                                                                                                      |
| trial            | The post decision wagering task contained 100 trials.                                                                                                                                                                                                                                                                                                         |
| Y, X, C, B, N, M | These columns indicate which colors in the color-test condition or shapes in the shape-test condition were assigned to the keys Y, X, C, B, N, and M on a QWERTZ keyboard (color-test condition: 1 = red, 2 = blue, 3 = green, 4 = orange, 5 = magenta, 6 = cyan; shape-test condition: 1 = triangle, 2 = diamond, 3 = circle, 4 = arch, 5 = cross, 6 = star) |
| color target     | If the participant was in the color-test condition, the color of the target in this trial is indicated (1 = red, 2 = blue, 3 = green, 4 = orange, 5 = magenta, 6 = cyan). Otherwise, a zero is displayed.                                                                                                                                                     |
| shape target     | If the participant was in the shape-test condition, the shape of the target in this trial is indicated (1 = triangle, 2 = diamond, 3 = circle, 4 = arch, 5 = cross, 6 = star). Otherwise, a zero is displayed.                                                                                                                                                |
| amot             | This column indicates the correct response key (1 = Y, 2 = X, 3 = C, 4 = B, 5 = N, 6 = M).                                                                                                                                                                                                                                                                    |

|                   |                                                                                                                        |
|-------------------|------------------------------------------------------------------------------------------------------------------------|
| antw              | This column indicates the actual response key presses of the participants (1 = Y, 2 = X, 3 = C, 4 = B, 5 = N, 6 = M).  |
| error             | In this column, an erroneous trial is indicated (1).                                                                   |
| trial_after_error | Since also the trials after an erroneous trial were excluded from the main analyses, these trials are also marked (1). |
| wagering_trial    | In this column, the twenty wagering trials are indicated (1).                                                          |
| wager             | The participants either bet 0,01€ or 0,50€ on their guess.                                                             |
| profit            | This column indicates the current profit in this trial.                                                                |
| response_time     | The computer measured the response times in milliseconds.                                                              |
