# Supplementary material for: Concurrent visual sequence learning
Source: Springer Nature journal article supplement (doi:10.1007/s00426-023-01810-2), 2023-03-22
Supplement: MOESM6 [file 24664062]

## Experiment 2 – Training – Data Legend

This document belongs to the article “Concurrent Visual Sequence Learning” by Sarah Wilts and Hilde Haider (sarah.wilts@uni-koeln.de, University of Cologne) submitted to the journal Psychological Research.

In this document the variable names and levels of the Excel file „Experiment2\_training\_data set“ are explained. The Excel file contains the raw data set of the training phase of the serial reaction time task.

|                |                                                                                                                                                           |
|----------------|-----------------------------------------------------------------------------------------------------------------------------------------------------------|
| subject_number | The numbers of the subjects from 1 to 64. The data of the participants 48 and 58 were not recorded due to technical issues.                               |
| condition      | The participants were randomly assigned to the color-test condition (1) or the shape-test condition (2). The test-phase was the same for both conditions. |
| block          | The training phase consisted of 7 blocks.                                                                                                                 |
| trial_total    | The whole training phase consisted of 623 trials.                                                                                                         |
| trial          | Each block consisted of 89 trials.                                                                                                                        |
| color target   | This column indicates the color of the color target. (1 = red, 2 = blue, 3 = green, 4 = orange, 5 = magenta, 6 = cyan).                                   |
| shape target   | This column indicates the shape of the shape target (1 = triangle, 2 = diamond, 3 = circle, 4 = arch, 5 = cross, 6 = star).                               |
| color deviant  | In this column, deviant colors are indicated (1).                                                                                                         |
| shape deviant  | In this column, deviant shapes are indicated (1).                                                                                                         |
| amot           | This column indicates the correct response key (1 =spacebar, 2 = none).                                                                                   |
| answ           | This column indicates the actual response key presses of the participants (1 = spacebar, 2 = none).                                                       |
| error          | In this column, an erroneous trial is indicated (1).                                                                                                      |

|               |                                                                                                  |
|---------------|--------------------------------------------------------------------------------------------------|
| response time | The computer measured the response times in milliseconds.                                        |
| miss          | This column indicates whether one of the deviant targets was missed by the participant (1).      |
| false alarm   | This column indicates whether a participant confounded a normal target for a deviant target (1). |
| color miss    | This column indicates specifically whether a deviant color was missed by the participant (1).    |
| shape miss    | This column indicates specifically whether a deviant shape was missed by the participant (1).    |
