# Supplementary material for: Concurrent visual sequence learning
Source: Psychol Res. 2023 Mar 22;87(7):2086–100. doi: 10.1007/s00426-023-01810-2 (PMC10457409; doi:10.1007/s00426-023-01810-2)
Supplement: Supplementary file 1 — Supplementary file1 (XLSX 81 KB) [file 426_2023_1810_MOESM1_ESM.xlsx]

## Sheet: neu
subject_number	trainmat	testmat	trial	grammar	string	position1	position2	position3	position4	position5	position6	position7	response	response_time	color_hit	color_correctrejection	shape_hit	shape_correctrejection	explicit_color	explicit_shape
1	1	2	1	2	17	5	1	4	2	3	5	1	1	5.347	0	0	1	0	0	0
1	1	2	2	2	14	4	2	4	2	5	1	0	1	4.997	0	0	1	0	0	0
1	1	2	3	1	4	4	3	3	4	1	0	0	0	1.258	0	0	0	1	0	0
1	1	2	4	1	2	4	4	3	1	0	0	0	1	1.276	0	0	0	0	0	0
1	1	2	5	2	13	5	3	1	3	2	1	0	1	1.688	0	0	1	0	0	0
1	1	2	6	1	5	4	3	3	3	4	1	0	0	1.281	0	0	0	1	0	0
1	1	2	7	1	3	5	1	1	5	1	0	0	0	1.155	0	0	0	1	0	0
1	1	2	8	1	1	4	3	4	1	0	0	0	0	2.92	0	0	0	1	0	0
1	1	2	9	1	6	4	4	3	2	4	1	0	1	1.254	0	0	0	0	0	0
1	1	2	10	1	7	4	3	3	3	4	3	1	0	1.625	0	0	0	1	0	0
1	1	2	11	2	18	4	4	2	1	3	2	1	0	1.293	0	0	0	0	0	0
1	1	2	12	2	12	4	2	3	2	1	0	0	0	1.146	0	0	0	0	0	0
1	1	2	13	2	15	4	4	2	3	5	1	0	1	1.568	0	0	1	0	0	0
1	1	2	14	1	9	5	1	5	2	3	4	1	0	0.595	0	0	0	1	0	0
1	1	2	15	2	20	5	1	2	4	2	5	1	1	0.97	0	0	1	0	0	0
1	1	2	16	2	19	4	4	2	3	3	5	1	1	1.302	0	0	1	0	0	0
1	1	2	17	2	11	5	3	5	1	0	0	0	1	1.31	0	0	1	0	0	0
1	1	2	18	1	10	5	1	1	5	2	4	1	0	1.131	0	0	0	1	0	0
1	1	2	19	2	16	5	1	4	2	5	1	0	0	0.697	0	0	0	0	0	0
1	1	2	20	1	8	5	5	2	3	4	3	1	1	4.09	0	0	0	0	0	0
2	2	2	1	1	10	5	1	1	5	2	4	1	1	3.1831	0	0	1	0	2	2
2	2	2	2	2	14	4	2	4	2	5	1	0	0	0.5709	0	0	0	1	2	2
2	2	2	3	1	1	4	3	4	1	0	0	0	1	0.7039	0	0	1	0	2	2
2	2	2	4	2	16	5	1	4	2	5	1	0	1	0.6234	0	0	0	0	2	2
2	2	2	5	1	6	4	4	3	2	4	1	0	0	1.7208	0	0	0	0	2	2
2	2	2	6	2	20	5	1	2	4	2	5	1	0	0.6707	0	0	0	1	2	2
2	2	2	7	1	3	5	1	1	5	1	0	0	1	0.5224	0	0	1	0	2	2
2	2	2	8	2	15	4	4	2	3	5	1	0	0	6.5595	0	0	0	1	2	2
2	2	2	9	1	9	5	1	5	2	3	4	1	1	0.3208	0	0	1	0	2	2
2	2	2	10	1	5	4	3	3	3	4	1	0	1	1.2215	0	0	1	0	2	2
2	2	2	11	1	2	4	4	3	1	0	0	0	1	0.4712	0	0	1	0	2	2
2	2	2	12	2	18	4	4	2	1	3	2	1	0	0.5221	0	0	0	1	2	2
2	2	2	13	2	17	5	1	4	2	3	5	1	0	0.5051	0	0	0	1	2	2
2	2	2	14	2	19	4	4	2	3	3	5	1	1	0.3064	0	0	0	0	2	2
2	2	2	15	1	8	5	5	2	3	4	3	1	0	0.5234	0	0	0	0	2	2
2	2	2	16	2	13	5	3	1	3	2	1	0	0	1.5706	0	0	0	1	2	2
2	2	2	17	1	4	4	3	3	4	1	0	0	1	0.7395	0	0	1	0	2	2
2	2	2	18	2	11	5	3	5	1	0	0	0	0	1.1377	0	0	0	1	2	2
2	2	2	19	1	7	4	3	3	3	4	3	1	1	0.8212	0	0	1	0	2	2
2	2	2	20	2	12	4	2	3	2	1	0	0	0	2.0866	0	0	0	1	2	2
3	2	2	1	1	9	5	1	5	2	3	4	1	1	3.7247	0	0	1	0	2	2
3	2	2	2	2	11	5	3	5	1	0	0	0	0	1.4706	0	0	0	1	2	2
3	2	2	3	2	13	5	3	1	3	2	1	0	0	1.3769	0	0	0	1	2	2
3	2	2	4	1	7	4	3	3	3	4	3	1	1	1.3892	0	0	1	0	2	2
3	2	2	5	1	8	5	5	2	3	4	3	1	0	1.6205	0	0	0	0	2	2
3	2	2	6	1	2	4	4	3	1	0	0	0	1	1.0344	0	0	1	0	2	2
3	2	2	7	1	5	4	3	3	3	4	1	0	1	0.9014	0	0	1	0	2	2
3	2	2	8	2	15	4	4	2	3	5	1	0	0	1.0066	0	0	0	1	2	2
3	2	2	9	2	18	4	4	2	1	3	2	1	0	1.0079	0	0	0	1	2	2
3	2	2	10	2	20	5	1	2	4	2	5	1	0	0.6932	0	0	0	1	2	2
3	2	2	11	1	6	4	4	3	2	4	1	0	1	1.0516	0	0	1	0	2	2
3	2	2	12	1	10	5	1	1	5	2	4	1	0	1.5058	0	0	0	0	2	2
3	2	2	13	1	4	4	3	3	4	1	0	0	1	0.9183	0	0	1	0	2	2
3	2	2	14	2	17	5	1	4	2	3	5	1	0	1.0182	0	0	0	1	2	2
3	2	2	15	1	1	4	3	4	1	0	0	0	1	1.4333	0	0	1	0	2	2
3	2	2	16	2	14	4	2	4	2	5	1	0	1	1.1527	0	0	0	0	2	2
3	2	2	17	2	19	4	4	2	3	3	5	1	0	0.7215	0	0	0	1	2	2
3	2	2	18	2	12	4	2	3	2	1	0	0	0	0.9372	0	0	0	1	2	2
3	2	2	19	2	16	5	1	4	2	5	1	0	0	0.8212	0	0	0	1	2	2
3	2	2	20	1	3	5	1	1	5	1	0	0	1	0.8735	0	0	1	0	2	2
4	1	2	1	2	16	5	1	4	2	5	1	0	0	5.5004	0	0	0	0	0	1
4	1	2	2	2	18	4	4	2	1	3	2	1	1	1.9253	0	0	1	0	0	1
4	1	2	3	1	4	4	3	3	4	1	0	0	1	1.8734	0	0	0	0	0	1
4	1	2	4	1	1	4	3	4	1	0	0	0	1	2.58	0	0	0	0	0	1
4	1	2	5	1	2	4	4	3	1	0	0	0	1	1.6866	0	0	0	0	0	1
4	1	2	6	2	19	4	4	2	3	3	5	1	0	5.1518	0	0	0	0	0	1
4	1	2	7	2	13	5	3	1	3	2	1	0	0	23.8915	0	0	0	0	0	1
4	1	2	8	2	20	5	1	2	4	2	5	1	0	1.4354	0	0	0	0	0	1
4	1	2	9	1	3	5	1	1	5	1	0	0	1	1.3057	0	0	0	0	0	1
4	1	2	10	1	6	4	4	3	2	4	1	0	1	6.8505	0	0	0	0	0	1
4	1	2	11	1	5	4	3	3	3	4	1	0	0	1.203	0	0	0	1	0	1
4	1	2	12	1	7	4	3	3	3	4	3	1	0	1.0997	0	0	0	1	0	1
4	1	2	13	2	14	4	2	4	2	5	1	0	1	2.2765	0	0	1	0	0	1
4	1	2	14	1	9	5	1	5	2	3	4	1	0	1.4847	0	0	0	1	0	1
4	1	2	15	2	17	5	1	4	2	3	5	1	0	1.603	0	0	0	0	0	1
4	1	2	16	2	12	4	2	3	2	1	0	0	0	1.8345	0	0	0	0	0	1
4	1	2	17	1	10	5	1	1	5	2	4	1	1	1.3892	0	0	0	0	0	1
4	1	2	18	2	11	5	3	5	1	0	0	0	0	3.3522	0	0	0	0	0	1
4	1	2	19	2	15	4	4	2	3	5	1	0	1	0.8396	0	0	1	0	0	1
4	1	2	20	1	8	5	5	2	3	4	3	1	1	0.6803	0	0	0	0	0	1
5	1	2	1	1	10	5	1	1	5	2	4	1	1	38.4036	0	0	0	0	1	2
5	1	2	2	1	8	5	5	2	3	4	3	1	1	13.3601	0	0	0	0	1	2
5	1	2	3	1	6	4	4	3	2	4	1	0	1	48.8005	0	0	0	0	1	2
5	1	2	4	1	9	5	1	5	2	3	4	1	0	62.5215	0	0	0	1	1	2
5	1	2	5	2	12	4	2	3	2	1	0	0	1	24.1595	0	0	1	0	1	2
5	1	2	6	1	7	4	3	3	3	4	3	1	0	72.2109	0	0	0	1	1	2
5	1	2	7	1	5	4	3	3	3	4	1	0	0	12.4959	0	0	0	1	1	2
5	1	2	8	2	16	5	1	4	2	5	1	0	0	60.1642	0	0	0	0	1	2
5	1	2	9	2	18	4	4	2	1	3	2	1	0	62.6746	0	0	0	0	1	2
5	1	2	10	2	11	5	3	5	1	0	0	0	1	75.1266	0	0	1	0	1	2
5	1	2	11	2	20	5	1	2	4	2	5	1	0	54.9794	0	0	0	0	1	2
5	1	2	12	1	2	4	4	3	1	0	0	0	1	35.3296	0	0	0	0	1	2
5	1	2	13	1	3	5	1	1	5	1	0	0	1	31.525	0	0	0	0	1	2
5	1	2	14	2	13	5	3	1	3	2	1	0	1	15.0887	0	0	1	0	1	2
5	1	2	15	2	14	4	2	4	2	5	1	0	0	28.7275	0	0	0	0	1	2
5	1	2	16	2	15	4	4	2	3	5	1	0	1	33.6124	0	0	1	0	1	2
5	1	2	17	2	17	5	1	4	2	3	5	1	1	24.3906	0	0	1	0	1	2
5	1	2	18	1	4	4	3	3	4	1	0	0	1	41.6887	0	0	0	0	1	2
5	1	2	19	1	1	4	3	4	1	0	0	0	0	35.9955	0	0	0	1	1	2
5	1	2	20	2	19	4	4	2	3	3	5	1	0	24.6485	0	0	0	0	1	2
6	1	2	1	1	1	4	3	4	1	0	0	0	0	5.332	0	0	0	1	3	1
6	1	2	2	2	13	5	3	1	3	2	1	0	1	1.333	0	0	1	0	3	1
6	1	2	3	1	4	4	3	3	4	1	0	0	1	1.071	0	0	0	0	3	1
6	1	2	4	2	14	4	2	4	2	5	1	0	1	1.433	0	0	1	0	3	1
6	1	2	5	2	20	5	1	2	4	2	5	1	1	1.444	0	0	1	0	3	1
6	1	2	6	1	7	4	3	3	3	4	3	1	1	0.843	0	0	0	0	3	1
6	1	2	7	2	11	5	3	5	1	0	0	0	0	1.181	0	0	0	0	3	1
6	1	2	8	2	19	4	4	2	3	3	5	1	0	0.895	0	0	0	0	3	1
6	1	2	9	1	3	5	1	1	5	1	0	0	1	2.229	0	0	0	0	3	1
6	1	2	10	1	2	4	4	3	1	0	0	0	1	2.061	0	0	0	0	3	1
6	1	2	11	1	8	5	5	2	3	4	3	1	0	0.404	0	0	0	1	3	1
6	1	2	12	1	9	5	1	5	2	3	4	1	0	1.087	0	0	0	1	3	1
6	1	2	13	2	17	5	1	4	2	3	5	1	1	0.886	0	0	1	0	3	1
6	1	2	14	1	5	4	3	3	3	4	1	0	1	0.777	0	0	0	0	3	1
6	1	2	15	2	18	4	4	2	1	3	2	1	1	0.922	0	0	1	0	3	1
6	1	2	16	1	10	5	1	1	5	2	4	1	0	1.594	0	0	0	1	3	1
6	1	2	17	2	12	4	2	3	2	1	0	0	1	1.137	0	0	1	0	3	1
6	1	2	18	1	6	4	4	3	2	4	1	0	0	0.95	0	0	0	1	3	1
6	1	2	19	2	16	5	1	4	2	5	1	0	1	25.479	0	0	1	0	3	1
6	1	2	20	2	15	4	4	2	3	5	1	0	0	0.771	0	0	0	0	3	1
7	1	2	1	2	17	5	1	4	2	3	5	1	0	12.531	0	0	0	0	2	2
7	1	2	2	1	3	5	1	1	5	1	0	0	0	5.961	0	0	0	1	2	2
7	1	2	3	1	1	4	3	4	1	0	0	0	1	3.998	0	0	0	0	2	2
7	1	2	4	1	4	4	3	3	4	1	0	0	0	1.1	0	0	0	1	2	2
7	1	2	5	2	14	4	2	4	2	5	1	0	1	1.156	0	0	1	0	2	2
7	1	2	6	1	10	5	1	1	5	2	4	1	1	2.476	0	0	0	0	2	2
7	1	2	7	2	18	4	4	2	1	3	2	1	1	3.228	0	0	1	0	2	2
7	1	2	8	1	5	4	3	3	3	4	1	0	0	1.099	0	0	0	1	2	2
7	1	2	9	1	6	4	4	3	2	4	1	0	0	1.258	0	0	0	1	2	2
7	1	2	10	2	15	4	4	2	3	5	1	0	1	1.1	0	0	1	0	2	2
7	1	2	11	1	7	4	3	3	3	4	3	1	0	1.254	0	0	0	1	2	2
7	1	2	12	2	12	4	2	3	2	1	0	0	0	3.166	0	0	0	0	2	2
7	1	2	13	2	20	5	1	2	4	2	5	1	1	1.575	0	0	1	0	2	2
7	1	2	14	1	8	5	5	2	3	4	3	1	1	1.501	0	0	0	0	2	2
7	1	2	15	2	11	5	3	5	1	0	0	0	0	1.019	0	0	0	0	2	2
7	1	2	16	1	9	5	1	5	2	3	4	1	1	1.485	0	0	0	0	2	2
7	1	2	17	2	13	5	3	1	3	2	1	0	0	3.48	0	0	0	0	2	2
7	1	2	18	2	19	4	4	2	3	3	5	1	1	1.223	0	0	1	0	2	2
7	1	2	19	1	2	4	4	3	1	0	0	0	0	3.033	0	0	0	1	2	2
7	1	2	20	2	16	5	1	4	2	5	1	0	1	1.748	0	0	1	0	2	2
8	1	2	1	1	7	4	3	3	3	4	3	1	0	6.3996	0	0	0	1	3	2
8	1	2	2	2	20	5	1	2	4	2	5	1	1	1.5872	0	0	1	0	3	2
8	1	2	3	2	19	4	4	2	3	3	5	1	1	3.7662	0	0	1	0	3	2
8	1	2	4	2	15	4	4	2	3	5	1	0	1	1.1699	0	0	1	0	3	2
8	1	2	5	2	12	4	2	3	2	1	0	0	0	1.4359	0	0	0	0	3	2
8	1	2	6	2	18	4	4	2	1	3	2	1	1	1.5166	0	0	1	0	3	2
8	1	2	7	1	2	4	4	3	1	0	0	0	0	2.8467	0	0	0	1	3	2
8	1	2	8	1	9	5	1	5	2	3	4	1	1	1.0987	0	0	0	0	3	2
8	1	2	9	1	4	4	3	3	4	1	0	0	0	1.3362	0	0	0	1	3	2
8	1	2	10	2	11	5	3	5	1	0	0	0	1	1.0362	0	0	1	0	3	2
8	1	2	11	1	8	5	5	2	3	4	3	1	1	1.152	0	0	0	0	3	2
8	1	2	12	1	6	4	4	3	2	4	1	0	0	1.6701	0	0	0	1	3	2
8	1	2	13	2	17	5	1	4	2	3	5	1	1	1.1029	0	0	1	0	3	2
8	1	2	14	1	3	5	1	1	5	1	0	0	1	1.6009	0	0	0	0	3	2
8	1	2	15	2	16	5	1	4	2	5	1	0	0	1.6868	0	0	0	0	3	2
8	1	2	16	1	5	4	3	3	3	4	1	0	1	2.7861	0	0	0	0	3	2
8	1	2	17	1	10	5	1	1	5	2	4	1	1	1.0056	0	0	0	0	3	2
8	1	2	18	2	13	5	3	1	3	2	1	0	0	2.3535	0	0	0	0	3	2
8	1	2	19	1	1	4	3	4	1	0	0	0	0	0.9534	0	0	0	1	3	2
8	1	2	20	2	14	4	2	4	2	5	1	0	0	2.8162	0	0	0	0	3	2
9	1	2	1	2	14	4	2	4	2	5	1	0	1	10.6707	0	0	1	0	0	2
9	1	2	2	1	6	4	4	3	2	4	1	0	0	1.2542	0	0	0	1	0	2
9	1	2	3	2	20	5	1	2	4	2	5	1	1	1.392	0	0	1	0	0	2
9	1	2	4	1	1	4	3	4	1	0	0	0	0	1.6301	0	0	0	1	0	2
9	1	2	5	1	4	4	3	3	4	1	0	0	1	1.2362	0	0	0	0	0	2
9	1	2	6	2	17	5	1	4	2	3	5	1	1	0.4944	0	0	1	0	0	2
9	1	2	7	2	16	5	1	4	2	5	1	0	0	0.4177	0	0	0	0	0	2
9	1	2	8	2	12	4	2	3	2	1	0	0	0	0.3898	0	0	0	0	0	2
9	1	2	9	2	18	4	4	2	1	3	2	1	0	0.5839	0	0	0	0	0	2
9	1	2	10	2	15	4	4	2	3	5	1	0	0	18.3468	0	0	0	0	0	2
9	1	2	11	2	13	5	3	1	3	2	1	0	0	1.1362	0	0	0	0	0	2
9	1	2	12	1	2	4	4	3	1	0	0	0	1	1.0401	0	0	0	0	0	2
9	1	2	13	1	10	5	1	1	5	2	4	1	1	1.3557	0	0	0	0	0	2
9	1	2	14	1	8	5	5	2	3	4	3	1	1	0.4018	0	0	0	0	0	2
9	1	2	15	1	7	4	3	3	3	4	3	1	1	0.6463	0	0	0	0	0	2
9	1	2	16	1	3	5	1	1	5	1	0	0	1	1.5435	0	0	0	0	0	2
9	1	2	17	1	5	4	3	3	3	4	1	0	0	0.7306	0	0	0	1	0	2
9	1	2	18	2	11	5	3	5	1	0	0	0	0	0.5885	0	0	0	0	0	2
9	1	2	19	1	9	5	1	5	2	3	4	1	1	0.9466	0	0	0	0	0	2
9	1	2	20	2	19	4	4	2	3	3	5	1	1	0.7532	0	0	1	0	0	2
10	2	2	1	2	11	5	3	5	1	0	0	0	0	5.7847	0	0	0	1	2	3
10	2	2	2	2	16	5	1	4	2	5	1	0	0	5.9115	0	0	0	1	2	3
10	2	2	3	1	9	5	1	5	2	3	4	1	0	1.3857	0	0	0	0	2	3
10	2	2	4	1	3	5	1	1	5	1	0	0	1	7.1195	0	0	1	0	2	3
10	2	2	5	1	1	4	3	4	1	0	0	0	1	2.5314	0	0	1	0	2	3
10	2	2	6	2	14	4	2	4	2	5	1	0	1	2.7725	0	0	0	0	2	3
10	2	2	7	1	10	5	1	1	5	2	4	1	1	1.5875	0	0	1	0	2	3
10	2	2	8	2	18	4	4	2	1	3	2	1	0	1.2636	0	0	0	1	2	3
10	2	2	9	1	2	4	4	3	1	0	0	0	0	5.3424	0	0	0	0	2	3
10	2	2	10	1	7	4	3	3	3	4	3	1	1	1.7661	0	0	1	0	2	3
10	2	2	11	2	15	4	4	2	3	5	1	0	0	3.5419	0	0	0	1	2	3
10	2	2	12	2	20	5	1	2	4	2	5	1	0	1.2804	0	0	0	1	2	3
10	2	2	13	2	12	4	2	3	2	1	0	0	0	1.2751	0	0	0	1	2	3
10	2	2	14	1	5	4	3	3	3	4	1	0	1	1.1824	0	0	1	0	2	3
10	2	2	15	1	8	5	5	2	3	4	3	1	0	1.8586	0	0	0	0	2	3
10	2	2	16	2	17	5	1	4	2	3	5	1	0	1.6367	0	0	0	1	2	3
10	2	2	17	1	4	4	3	3	4	1	0	0	1	1.019	0	0	1	0	2	3
10	2	2	18	1	6	4	4	3	2	4	1	0	1	0.8814	0	0	1	0	2	3
10	2	2	19	2	19	4	4	2	3	3	5	1	1	0.7547	0	0	0	0	2	3
10	2	2	20	2	13	5	3	1	3	2	1	0	0	1.5949	0	0	0	1	2	3
11	1	1	1	1	7	4	3	3	3	4	3	1	0	2.492	0	0	0	0	4	3
11	1	1	2	2	12	4	2	3	2	1	0	0	0	1.2139	0	1	0	0	4	3
11	1	1	3	2	14	4	2	4	2	5	1	0	0	1.2501	0	1	0	0	4	3
11	1	1	4	2	11	5	3	5	1	0	0	0	0	2.0542	0	1	0	0	4	3
11	1	1	5	2	13	5	3	1	3	2	1	0	1	3.4806	0	0	0	0	4	3
11	1	1	6	2	19	4	4	2	3	3	5	1	1	1.4558	0	0	0	0	4	3
11	1	1	7	2	17	5	1	4	2	3	5	1	1	1.1561	0	0	0	0	4	3
11	1	1	8	1	10	5	1	1	5	2	4	1	0	2.6494	0	0	0	0	4	3
11	1	1	9	1	9	5	1	5	2	3	4	1	1	0.9548	1	0	0	0	4	3
11	1	1	10	2	15	4	4	2	3	5	1	0	0	2.9413	0	1	0	0	4	3
11	1	1	11	1	3	5	1	1	5	1	0	0	1	1.0673	1	0	0	0	4	3
11	1	1	12	1	5	4	3	3	3	4	1	0	1	1.144	1	0	0	0	4	3
11	1	1	13	2	18	4	4	2	1	3	2	1	1	0.6895	0	0	0	0	4	3
11	1	1	14	1	6	4	4	3	2	4	1	0	1	1.771	1	0	0	0	4	3
11	1	1	15	1	4	4	3	3	4	1	0	0	0	1.2337	0	0	0	0	4	3
11	1	1	16	2	16	5	1	4	2	5	1	0	1	0.954	0	0	0	0	4	3
11	1	1	17	1	1	4	3	4	1	0	0	0	0	2.2765	0	0	0	0	4	3
11	1	1	18	2	20	5	1	2	4	2	5	1	1	0.5626	0	0	0	0	4	3
11	1	1	19	1	2	4	4	3	1	0	0	0	0	4.9379	0	0	0	0	4	3
11	1	1	20	1	8	5	5	2	3	4	3	1	1	0.8472	1	0	0	0	4	3
12	1	1	1	1	9	5	1	5	2	3	4	1	0	6.8819	0	0	0	0	2	3
12	1	1	2	2	16	5	1	4	2	5	1	0	0	2.0348	0	1	0	0	2	3
12	1	1	3	2	14	4	2	4	2	5	1	0	1	1.0339	0	0	0	0	2	3
12	1	1	4	2	13	5	3	1	3	2	1	0	1	3.1586	0	0	0	0	2	3
12	1	1	5	1	2	4	4	3	1	0	0	0	1	1.5681	1	0	0	0	2	3
12	1	1	6	1	3	5	1	1	5	1	0	0	1	1.1079	1	0	0	0	2	3
12	1	1	7	1	7	4	3	3	3	4	3	1	1	0.8514	1	0	0	0	2	3
12	1	1	8	1	5	4	3	3	3	4	1	0	1	0.8154	1	0	0	0	2	3
12	1	1	9	1	10	5	1	1	5	2	4	1	1	1.1512	1	0	0	0	2	3
12	1	1	10	1	8	5	5	2	3	4	3	1	0	1.6302	0	0	0	0	2	3
12	1	1	11	2	17	5	1	4	2	3	5	1	0	1.0349	0	1	0	0	2	3
12	1	1	12	2	15	4	4	2	3	5	1	0	0	2.7189	0	1	0	0	2	3
12	1	1	13	1	1	4	3	4	1	0	0	0	1	0.8328	1	0	0	0	2	3
12	1	1	14	2	11	5	3	5	1	0	0	0	1	3.824	0	0	0	0	2	3
12	1	1	15	2	20	5	1	2	4	2	5	1	0	2.4677	0	1	0	0	2	3
12	1	1	16	2	12	4	2	3	2	1	0	0	1	1.2171	0	0	0	0	2	3
12	1	1	17	2	18	4	4	2	1	3	2	1	1	2.2546	0	0	0	0	2	3
12	1	1	18	1	6	4	4	3	2	4	1	0	1	1.2556	1	0	0	0	2	3
12	1	1	19	2	19	4	4	2	3	3	5	1	1	0.7107	0	0	0	0	2	3
12	1	1	20	1	4	4	3	3	4	1	0	0	1	0.6572	1	0	0	0	2	3
13	2	1	1	1	8	5	5	2	3	4	3	1	1	2.8334	0	0	0	0	4	4
13	2	1	2	1	10	5	1	1	5	2	4	1	1	1.4688	0	0	0	0	4	4
13	2	1	3	1	5	4	3	3	3	4	1	0	1	1.0849	0	0	0	0	4	4
13	2	1	4	1	6	4	4	3	2	4	1	0	1	3.7361	0	0	0	0	4	4
13	2	1	5	2	19	4	4	2	3	3	5	1	0	0.2854	0	0	0	0	4	4
13	2	1	6	1	9	5	1	5	2	3	4	1	1	1.2673	0	0	0	0	4	4
13	2	1	7	2	16	5	1	4	2	5	1	0	1	0.5677	1	0	0	0	4	4
13	2	1	8	2	17	5	1	4	2	3	5	1	0	0.2503	0	0	0	0	4	4
13	2	1	9	1	4	4	3	3	4	1	0	0	1	1.1336	0	0	0	0	4	4
13	2	1	10	1	3	5	1	1	5	1	0	0	0	0.4178	0	1	0	0	4	4
13	2	1	11	1	2	4	4	3	1	0	0	0	0	0.3675	0	1	0	0	4	4
13	2	1	12	1	1	4	3	4	1	0	0	0	1	1.0019	0	0	0	0	4	4
13	2	1	13	2	18	4	4	2	1	3	2	1	0	0.3518	0	0	0	0	4	4
13	2	1	14	2	12	4	2	3	2	1	0	0	1	0.4009	1	0	0	0	4	4
13	2	1	15	2	14	4	2	4	2	5	1	0	1	0.354	1	0	0	0	4	4
13	2	1	16	1	7	4	3	3	3	4	3	1	0	2.7392	0	1	0	0	4	4
13	2	1	17	2	15	4	4	2	3	5	1	0	0	0.2859	0	0	0	0	4	4
13	2	1	18	2	13	5	3	1	3	2	1	0	1	0.7351	1	0	0	0	4	4
13	2	1	19	2	11	5	3	5	1	0	0	0	1	1.7184	1	0	0	0	4	4
13	2	1	20	2	20	5	1	2	4	2	5	1	1	0.7681	1	0	0	0	4	4
14	1	1	1	1	10	5	1	1	5	2	4	1	1	2.0025	1	0	0	0	3	2
14	1	1	2	2	13	5	3	1	3	2	1	0	1	1.975	0	0	0	0	3	2
14	1	1	3	2	14	4	2	4	2	5	1	0	1	1.4676	0	0	0	0	3	2
14	1	1	4	1	2	4	4	3	1	0	0	0	1	3.9932	1	0	0	0	3	2
14	1	1	5	1	9	5	1	5	2	3	4	1	1	1.3681	1	0	0	0	3	2
14	1	1	6	1	8	5	5	2	3	4	3	1	1	1.2871	1	0	0	0	3	2
14	1	1	7	1	4	4	3	3	4	1	0	0	1	2.0571	1	0	0	0	3	2
14	1	1	8	1	1	4	3	4	1	0	0	0	1	1.4572	1	0	0	0	3	2
14	1	1	9	2	15	4	4	2	3	5	1	0	1	1.0876	0	0	0	0	3	2
14	1	1	10	2	18	4	4	2	1	3	2	1	1	1.3079	0	0	0	0	3	2
14	1	1	11	2	12	4	2	3	2	1	0	0	1	1.3608	0	0	0	0	3	2
14	1	1	12	2	17	5	1	4	2	3	5	1	1	1.1242	0	0	0	0	3	2
14	1	1	13	1	7	4	3	3	3	4	3	1	1	3.0233	1	0	0	0	3	2
14	1	1	14	1	5	4	3	3	3	4	1	0	1	1.3532	1	0	0	0	3	2
14	1	1	15	2	20	5	1	2	4	2	5	1	1	0.94	0	0	0	0	3	2
14	1	1	16	2	19	4	4	2	3	3	5	1	1	1.0424	0	0	0	0	3	2
14	1	1	17	2	16	5	1	4	2	5	1	0	1	0.911	0	0	0	0	3	2
14	1	1	18	1	3	5	1	1	5	1	0	0	0	0.8757	0	0	0	0	3	2
14	1	1	19	2	11	5	3	5	1	0	0	0	1	1.4897	0	0	0	0	3	2
14	1	1	20	1	6	4	4	3	2	4	1	0	1	0.9565	1	0	0	0	3	2
15	2	1	1	1	8	5	5	2	3	4	3	1	0	7.5915	0	1	0	0	1	2
15	2	1	2	1	4	4	3	3	4	1	0	0	0	6.2243	0	1	0	0	1	2
15	2	1	3	2	17	5	1	4	2	3	5	1	1	2.1475	1	0	0	0	1	2
15	2	1	4	1	5	4	3	3	3	4	1	0	0	1.2003	0	1	0	0	1	2
15	2	1	5	2	13	5	3	1	3	2	1	0	0	1.3165	0	0	0	0	1	2
15	2	1	6	2	18	4	4	2	1	3	2	1	1	1.1996	1	0	0	0	1	2
15	2	1	7	2	11	5	3	5	1	0	0	0	1	2.4487	1	0	0	0	1	2
15	2	1	8	1	1	4	3	4	1	0	0	0	0	1.3329	0	1	0	0	1	2
15	2	1	9	2	19	4	4	2	3	3	5	1	1	0.9513	1	0	0	0	1	2
15	2	1	10	2	16	5	1	4	2	5	1	0	1	1.2188	1	0	0	0	1	2
15	2	1	11	1	2	4	4	3	1	0	0	0	0	1.4671	0	1	0	0	1	2
15	2	1	12	2	14	4	2	4	2	5	1	0	1	1.1182	1	0	0	0	1	2
15	2	1	13	1	6	4	4	3	2	4	1	0	0	3.8299	0	1	0	0	1	2
15	2	1	14	1	7	4	3	3	3	4	3	1	0	1.516	0	1	0	0	1	2
15	2	1	15	1	10	5	1	1	5	2	4	1	1	0.8834	0	0	0	0	1	2
15	2	1	16	2	15	4	4	2	3	5	1	0	1	0.7363	1	0	0	0	1	2
15	2	1	17	1	9	5	1	5	2	3	4	1	1	1.4333	0	0	0	0	1	2
15	2	1	18	1	3	5	1	1	5	1	0	0	0	1.0839	0	1	0	0	1	2
15	2	1	19	2	12	4	2	3	2	1	0	0	0	1.2994	0	0	0	0	1	2
15	2	1	20	2	20	5	1	2	4	2	5	1	0	0.6007	0	0	0	0	1	2
16	2	1	1	1	2	4	4	3	1	0	0	0	0	5.0943	0	1	0	0	3	1
16	2	1	2	1	5	4	3	3	3	4	1	0	0	1.1194	0	1	0	0	3	1
16	2	1	3	1	10	5	1	1	5	2	4	1	1	2.3797	0	0	0	0	3	1
16	2	1	4	2	20	5	1	2	4	2	5	1	1	0.9607	1	0	0	0	3	1
16	2	1	5	2	16	5	1	4	2	5	1	0	1	0.7026	1	0	0	0	3	1
16	2	1	6	2	14	4	2	4	2	5	1	0	1	0.6046	1	0	0	0	3	1
16	2	1	7	1	4	4	3	3	4	1	0	0	0	4.3446	0	1	0	0	3	1
16	2	1	8	2	15	4	4	2	3	5	1	0	1	0.5329	1	0	0	0	3	1
16	2	1	9	2	19	4	4	2	3	3	5	1	0	1.5012	0	0	0	0	3	1
16	2	1	10	2	11	5	3	5	1	0	0	0	1	0.4808	1	0	0	0	3	1
16	2	1	11	2	18	4	4	2	1	3	2	1	1	0.6682	1	0	0	0	3	1
16	2	1	12	2	12	4	2	3	2	1	0	0	0	1.1266	0	0	0	0	3	1
16	2	1	13	1	9	5	1	5	2	3	4	1	1	0.3167	0	0	0	0	3	1
16	2	1	14	1	8	5	5	2	3	4	3	1	1	0.4468	0	0	0	0	3	1
16	2	1	15	1	7	4	3	3	3	4	3	1	0	0.624	0	1	0	0	3	1
16	2	1	16	1	3	5	1	1	5	1	0	0	1	5.1084	0	0	0	0	3	1
16	2	1	17	2	17	5	1	4	2	3	5	1	1	0.2915	1	0	0	0	3	1
16	2	1	18	1	6	4	4	3	2	4	1	0	0	0.9856	0	1	0	0	3	1
16	2	1	19	1	1	4	3	4	1	0	0	0	0	0.3902	0	1	0	0	3	1
16	2	1	20	2	13	5	3	1	3	2	1	0	1	0.4505	1	0	0	0	3	1
17	1	1	1	1	10	5	1	1	5	2	4	1	1	4.6286	1	0	0	0	0	2
17	1	1	2	2	14	4	2	4	2	5	1	0	0	1.5849	0	1	0	0	0	2
17	1	1	3	1	5	4	3	3	3	4	1	0	1	2.0616	1	0	0	0	0	2
17	1	1	4	2	11	5	3	5	1	0	0	0	1	1.2937	0	0	0	0	0	2
17	1	1	5	2	16	5	1	4	2	5	1	0	0	3.7606	0	1	0	0	0	2
17	1	1	6	1	2	4	4	3	1	0	0	0	1	0.5153	1	0	0	0	0	2
17	1	1	7	1	3	5	1	1	5	1	0	0	0	1.8051	0	0	0	0	0	2
17	1	1	8	2	20	5	1	2	4	2	5	1	0	0.9707	0	1	0	0	0	2
17	1	1	9	1	7	4	3	3	3	4	3	1	1	0.3563	1	0	0	0	0	2
17	1	1	10	1	9	5	1	5	2	3	4	1	1	0.5182	1	0	0	0	0	2
17	1	1	11	1	8	5	5	2	3	4	3	1	1	1.8634	1	0	0	0	0	2
17	1	1	12	2	18	4	4	2	1	3	2	1	0	0.4215	0	1	0	0	0	2
17	1	1	13	1	1	4	3	4	1	0	0	0	1	0.3396	1	0	0	0	0	2
17	1	1	14	2	12	4	2	3	2	1	0	0	0	1.625	0	1	0	0	0	2
17	1	1	15	2	19	4	4	2	3	3	5	1	0	0.9707	0	1	0	0	0	2
17	1	1	16	2	13	5	3	1	3	2	1	0	0	1.2552	0	1	0	0	0	2
17	1	1	17	2	17	5	1	4	2	3	5	1	1	0.6361	0	0	0	0	0	2
17	1	1	18	1	6	4	4	3	2	4	1	0	1	0.52	1	0	0	0	0	2
17	1	1	19	2	15	4	4	2	3	5	1	0	0	0.6075	0	1	0	0	0	2
17	1	1	20	1	4	4	3	3	4	1	0	0	1	0.2685	1	0	0	0	0	2
18	2	1	1	1	5	4	3	3	3	4	1	0	1	2.4715	0	0	0	0	1	4
18	2	1	2	1	7	4	3	3	3	4	3	1	0	1.688	0	1	0	0	1	4
18	2	1	3	1	10	5	1	1	5	2	4	1	1	1.38	0	0	0	0	1	4
18	2	1	4	2	20	5	1	2	4	2	5	1	1	6.5507	1	0	0	0	1	4
18	2	1	5	1	4	4	3	3	4	1	0	0	1	0.9048	0	0	0	0	1	4
18	2	1	6	2	15	4	4	2	3	5	1	0	0	0.9502	0	0	0	0	1	4
18	2	1	7	1	9	5	1	5	2	3	4	1	1	26.6808	0	0	0	0	1	4
18	2	1	8	1	8	5	5	2	3	4	3	1	0	11.9492	0	1	0	0	1	4
18	2	1	9	2	17	5	1	4	2	3	5	1	1	6.4342	1	0	0	0	1	4
18	2	1	10	2	12	4	2	3	2	1	0	0	0	364.175	0	0	0	0	1	4
18	2	1	11	2	11	5	3	5	1	0	0	0	1	1.4491	1	0	0	0	1	4
18	2	1	12	1	3	5	1	1	5	1	0	0	0	1.5774	0	1	0	0	1	4
18	2	1	13	2	18	4	4	2	1	3	2	1	1	24.0317	1	0	0	0	1	4
18	2	1	14	2	14	4	2	4	2	5	1	0	0	23.758	0	0	0	0	1	4
18	2	1	15	2	13	5	3	1	3	2	1	0	1	0.9037	1	0	0	0	1	4
18	2	1	16	2	19	4	4	2	3	3	5	1	1	1.6358	1	0	0	0	1	4
18	2	1	17	1	1	4	3	4	1	0	0	0	1	32.1606	0	0	0	0	1	4
18	2	1	18	1	2	4	4	3	1	0	0	0	0	1.1291	0	1	0	0	1	4
18	2	1	19	2	16	5	1	4	2	5	1	0	1	1.0646	1	0	0	0	1	4
18	2	1	20	1	6	4	4	3	2	4	1	0	1	0.9862	0	0	0	0	1	4
19	2	1	1	2	12	4	2	3	2	1	0	0	1	4.903	1	0	0	0	2	1
19	2	1	2	1	2	4	4	3	1	0	0	0	0	3.237	0	1	0	0	2	1
19	2	1	3	1	7	4	3	3	3	4	3	1	0	1.2	0	1	0	0	2	1
19	2	1	4	1	9	5	1	5	2	3	4	1	1	2.423	0	0	0	0	2	1
19	2	1	5	1	4	4	3	3	4	1	0	0	0	2.403	0	1	0	0	2	1
19	2	1	6	1	8	5	5	2	3	4	3	1	1	2.933	0	0	0	0	2	1
19	2	1	7	1	10	5	1	1	5	2	4	1	1	2.304	0	0	0	0	2	1
19	2	1	8	2	13	5	3	1	3	2	1	0	1	2.534	1	0	0	0	2	1
19	2	1	9	2	19	4	4	2	3	3	5	1	0	1.313	0	0	0	0	2	1
19	2	1	10	2	11	5	3	5	1	0	0	0	0	1.814	0	0	0	0	2	1
19	2	1	11	1	1	4	3	4	1	0	0	0	0	1.636	0	1	0	0	2	1
19	2	1	12	1	5	4	3	3	3	4	1	0	0	0.991	0	1	0	0	2	1
19	2	1	13	2	15	4	4	2	3	5	1	0	1	1.624	1	0	0	0	2	1
19	2	1	14	1	3	5	1	1	5	1	0	0	0	1.29	0	1	0	0	2	1
19	2	1	15	2	16	5	1	4	2	5	1	0	1	1.723	1	0	0	0	2	1
19	2	1	16	2	20	5	1	2	4	2	5	1	1	1.344	1	0	0	0	2	1
19	2	1	17	2	18	4	4	2	1	3	2	1	1	1.251	1	0	0	0	2	1
19	2	1	18	1	6	4	4	3	2	4	1	0	1	2.521	0	0	0	0	2	1
19	2	1	19	2	14	4	2	4	2	5	1	0	0	1.355	0	0	0	0	2	1
19	2	1	20	2	17	5	1	4	2	3	5	1	0	1.869	0	0	0	0	2	1
20	2	1	1	2	17	5	1	4	2	3	5	1	1	5.845	1	0	0	0	3	2
20	2	1	2	2	20	5	1	2	4	2	5	1	1	1.407	1	0	0	0	3	2
20	2	1	3	1	3	5	1	1	5	1	0	0	1	2.848	0	0	0	0	3	2
20	2	1	4	2	13	5	3	1	3	2	1	0	1	10.492	1	0	0	0	3	2
20	2	1	5	2	15	4	4	2	3	5	1	0	1	0.971	1	0	0	0	3	2
20	2	1	6	2	16	5	1	4	2	5	1	0	0	2.103	0	0	0	0	3	2
20	2	1	7	2	12	4	2	3	2	1	0	0	1	2.016	1	0	0	0	3	2
20	2	1	8	1	8	5	5	2	3	4	3	1	1	0.938	0	0	0	0	3	2
20	2	1	9	2	19	4	4	2	3	3	5	1	1	1.207	1	0	0	0	3	2
20	2	1	10	2	11	5	3	5	1	0	0	0	0	1.237	0	0	0	0	3	2
20	2	1	11	1	9	5	1	5	2	3	4	1	0	1.352	0	1	0	0	3	2
20	2	1	12	1	4	4	3	3	4	1	0	0	0	0.406	0	1	0	0	3	2
20	2	1	13	1	7	4	3	3	3	4	3	1	0	0.321	0	1	0	0	3	2
20	2	1	14	1	10	5	1	1	5	2	4	1	1	0.922	0	0	0	0	3	2
20	2	1	15	1	1	4	3	4	1	0	0	0	0	1.435	0	1	0	0	3	2
20	2	1	16	2	14	4	2	4	2	5	1	0	1	0.492	1	0	0	0	3	2
20	2	1	17	2	18	4	4	2	1	3	2	1	1	0.637	1	0	0	0	3	2
20	2	1	18	1	2	4	4	3	1	0	0	0	0	1.785	0	1	0	0	3	2
20	2	1	19	1	5	4	3	3	3	4	1	0	0	0.55	0	1	0	0	3	2
20	2	1	20	1	6	4	4	3	2	4	1	0	0	1.818	0	1	0	0	3	2
21	1	1	1	1	6	4	4	3	2	4	1	0	1	3.4069	1	0	0	0	2	1
21	1	1	2	2	17	5	1	4	2	3	5	1	1	0.7196	0	0	0	0	2	1
21	1	1	3	2	12	4	2	3	2	1	0	0	0	0.7008	0	1	0	0	2	1
21	1	1	4	1	9	5	1	5	2	3	4	1	1	0.4193	1	0	0	0	2	1
21	1	1	5	1	3	5	1	1	5	1	0	0	1	0.4482	1	0	0	0	2	1
21	1	1	6	1	5	4	3	3	3	4	1	0	0	0.3624	0	0	0	0	2	1
21	1	1	7	2	16	5	1	4	2	5	1	0	1	0.5133	0	0	0	0	2	1
21	1	1	8	1	8	5	5	2	3	4	3	1	1	0.3893	1	0	0	0	2	1
21	1	1	9	1	2	4	4	3	1	0	0	0	0	0.4638	0	0	0	0	2	1
21	1	1	10	2	13	5	3	1	3	2	1	0	0	0.3966	0	1	0	0	2	1
21	1	1	11	2	11	5	3	5	1	0	0	0	0	0.4954	0	1	0	0	2	1
21	1	1	12	1	7	4	3	3	3	4	3	1	0	0.3674	0	0	0	0	2	1
21	1	1	13	2	15	4	4	2	3	5	1	0	0	1.5312	0	1	0	0	2	1
21	1	1	14	2	20	5	1	2	4	2	5	1	1	1.0021	0	0	0	0	2	1
21	1	1	15	2	18	4	4	2	1	3	2	1	0	0.8546	0	1	0	0	2	1
21	1	1	16	2	19	4	4	2	3	3	5	1	0	1.1678	0	1	0	0	2	1
21	1	1	17	1	4	4	3	3	4	1	0	0	0	1.2317	0	0	0	0	2	1
21	1	1	18	1	10	5	1	1	5	2	4	1	0	0.4404	0	0	0	0	2	1
21	1	1	19	1	1	4	3	4	1	0	0	0	0	0.4935	0	0	0	0	2	1
21	1	1	20	2	14	4	2	4	2	5	1	0	1	0.3356	0	0	0	0	2	1
22	1	1	1	1	9	5	1	5	2	3	4	1	1	3.209	1	0	0	0	5	1
22	1	1	2	1	3	5	1	1	5	1	0	0	1	1.145	1	0	0	0	5	1
22	1	1	3	1	5	4	3	3	3	4	1	0	1	2.158	1	0	0	0	5	1
22	1	1	4	1	10	5	1	1	5	2	4	1	1	0.878	1	0	0	0	5	1
22	1	1	5	1	4	4	3	3	4	1	0	0	1	0.938	1	0	0	0	5	1
22	1	1	6	1	7	4	3	3	3	4	3	1	1	0.8	1	0	0	0	5	1
22	1	1	7	1	2	4	4	3	1	0	0	0	1	0.785	1	0	0	0	5	1
22	1	1	8	2	12	4	2	3	2	1	0	0	0	1.285	0	1	0	0	5	1
22	1	1	9	2	19	4	4	2	3	3	5	1	0	0.695	0	1	0	0	5	1
22	1	1	10	1	1	4	3	4	1	0	0	0	1	0.773	1	0	0	0	5	1
22	1	1	11	2	16	5	1	4	2	5	1	0	0	0.556	0	1	0	0	5	1
22	1	1	12	2	17	5	1	4	2	3	5	1	0	0.696	0	1	0	0	5	1
22	1	1	13	2	13	5	3	1	3	2	1	0	0	0.542	0	1	0	0	5	1
22	1	1	14	2	11	5	3	5	1	0	0	0	1	0.534	0	0	0	0	5	1
22	1	1	15	2	14	4	2	4	2	5	1	0	0	0.492	0	1	0	0	5	1
22	1	1	16	1	6	4	4	3	2	4	1	0	0	0.778	0	0	0	0	5	1
22	1	1	17	2	20	5	1	2	4	2	5	1	0	0.578	0	1	0	0	5	1
22	1	1	18	2	15	4	4	2	3	5	1	0	1	0.46	0	0	0	0	5	1
22	1	1	19	1	8	5	5	2	3	4	3	1	1	0.556	1	0	0	0	5	1
22	1	1	20	2	18	4	4	2	1	3	2	1	1	0.695	0	0	0	0	5	1
23	2	1	1	1	10	5	1	1	5	2	4	1	1	7.1354	0	0	0	0	2	0
23	2	1	2	1	7	4	3	3	3	4	3	1	1	0.8345	0	0	0	0	2	0
23	2	1	3	2	20	5	1	2	4	2	5	1	1	1.0254	1	0	0	0	2	0
23	2	1	4	2	17	5	1	4	2	3	5	1	1	2.1724	1	0	0	0	2	0
23	2	1	5	1	3	5	1	1	5	1	0	0	0	3.9328	0	1	0	0	2	0
23	2	1	6	2	15	4	4	2	3	5	1	0	0	3.1784	0	0	0	0	2	0
23	2	1	7	2	16	5	1	4	2	5	1	0	1	1.1716	1	0	0	0	2	0
23	2	1	8	1	1	4	3	4	1	0	0	0	0	1.7183	0	1	0	0	2	0
23	2	1	9	2	12	4	2	3	2	1	0	0	0	2.1669	0	0	0	0	2	0
23	2	1	10	1	4	4	3	3	4	1	0	0	1	6.1671	0	0	0	0	2	0
23	2	1	11	1	8	5	5	2	3	4	3	1	1	2.592	0	0	0	0	2	0
23	2	1	12	2	13	5	3	1	3	2	1	0	1	3.7754	1	0	0	0	2	0
23	2	1	13	2	11	5	3	5	1	0	0	0	1	1.1682	1	0	0	0	2	0
23	2	1	14	1	6	4	4	3	2	4	1	0	0	1.5337	0	1	0	0	2	0
23	2	1	15	1	9	5	1	5	2	3	4	1	1	1.4109	0	0	0	0	2	0
23	2	1	16	1	5	4	3	3	3	4	1	0	0	0.6465	0	1	0	0	2	0
23	2	1	17	2	19	4	4	2	3	3	5	1	0	0.6286	0	0	0	0	2	0
23	2	1	18	1	2	4	4	3	1	0	0	0	0	0.663	0	1	0	0	2	0
23	2	1	19	2	18	4	4	2	1	3	2	1	0	1.5839	0	0	0	0	2	0
23	2	1	20	2	14	4	2	4	2	5	1	0	1	0.4881	1	0	0	0	2	0
24	2	1	1	2	20	5	1	2	4	2	5	1	1	1.9348	1	0	0	0	4	4
24	2	1	2	1	5	4	3	3	3	4	1	0	0	1.1647	0	1	0	0	4	4
24	2	1	3	1	2	4	4	3	1	0	0	0	0	1.9375	0	1	0	0	4	4
24	2	1	4	2	19	4	4	2	3	3	5	1	1	1.1344	1	0	0	0	4	4
24	2	1	5	1	1	4	3	4	1	0	0	0	0	4.9213	0	1	0	0	4	4
24	2	1	6	1	9	5	1	5	2	3	4	1	0	2.3469	0	1	0	0	4	4
24	2	1	7	2	14	4	2	4	2	5	1	0	1	0.9067	1	0	0	0	4	4
24	2	1	8	1	6	4	4	3	2	4	1	0	0	1.4506	0	1	0	0	4	4
24	2	1	9	1	7	4	3	3	3	4	3	1	0	1.2403	0	1	0	0	4	4
24	2	1	10	2	12	4	2	3	2	1	0	0	1	0.762	1	0	0	0	4	4
24	2	1	11	2	16	5	1	4	2	5	1	0	1	0.4958	1	0	0	0	4	4
24	2	1	12	2	15	4	4	2	3	5	1	0	1	0.6587	1	0	0	0	4	4
24	2	1	13	2	13	5	3	1	3	2	1	0	0	0.7778	0	0	0	0	4	4
24	2	1	14	2	11	5	3	5	1	0	0	0	1	0.7036	1	0	0	0	4	4
24	2	1	15	2	17	5	1	4	2	3	5	1	0	0.5567	0	0	0	0	4	4
24	2	1	16	1	4	4	3	3	4	1	0	0	0	1.1684	0	1	0	0	4	4
24	2	1	17	1	10	5	1	1	5	2	4	1	1	0.6498	0	0	0	0	4	4
24	2	1	18	1	3	5	1	1	5	1	0	0	1	0.853	0	0	0	0	4	4
24	2	1	19	2	18	4	4	2	1	3	2	1	1	0.7224	1	0	0	0	4	4
24	2	1	20	1	8	5	5	2	3	4	3	1	0	0.6677	0	1	0	0	4	4
25	1	1	1	1	6	4	4	3	2	4	1	0	1	4.8676	1	0	0	0	1	0
25	1	1	2	1	10	5	1	1	5	2	4	1	1	1.502	1	0	0	0	1	0
25	1	1	3	1	9	5	1	5	2	3	4	1	1	1.4753	1	0	0	0	1	0
25	1	1	4	1	5	4	3	3	3	4	1	0	0	3.0183	0	0	0	0	1	0
25	1	1	5	2	19	4	4	2	3	3	5	1	1	1.0352	0	0	0	0	1	0
25	1	1	6	2	16	5	1	4	2	5	1	0	1	1.0381	0	0	0	0	1	0
25	1	1	7	2	11	5	3	5	1	0	0	0	0	1.4942	0	1	0	0	1	0
25	1	1	8	1	1	4	3	4	1	0	0	0	1	0.7916	1	0	0	0	1	0
25	1	1	9	1	2	4	4	3	1	0	0	0	1	0.3958	1	0	0	0	1	0
25	1	1	10	2	20	5	1	2	4	2	5	1	1	0.5768	0	0	0	0	1	0
25	1	1	11	1	8	5	5	2	3	4	3	1	1	0.3578	1	0	0	0	1	0
25	1	1	12	2	17	5	1	4	2	3	5	1	1	0.681	0	0	0	0	1	0
25	1	1	13	2	12	4	2	3	2	1	0	0	1	1.2293	0	0	0	0	1	0
25	1	1	14	2	18	4	4	2	1	3	2	1	0	1.4532	0	1	0	0	1	0
25	1	1	15	1	3	5	1	1	5	1	0	0	1	3.0429	1	0	0	0	1	0
25	1	1	16	1	4	4	3	3	4	1	0	0	1	1.0766	1	0	0	0	1	0
25	1	1	17	2	14	4	2	4	2	5	1	0	1	0.8451	0	0	0	0	1	0
25	1	1	18	2	15	4	4	2	3	5	1	0	1	0.4992	0	0	0	0	1	0
25	1	1	19	1	7	4	3	3	3	4	3	1	0	0.9452	0	0	0	0	1	0
25	1	1	20	2	13	5	3	1	3	2	1	0	1	0.667	0	0	0	0	1	0
26	1	1	1	2	14	4	2	4	2	5	1	0	1	3.8809	0	0	0	0	3	1
26	1	1	2	1	4	4	3	3	4	1	0	0	1	0.6811	1	0	0	0	3	1
26	1	1	3	2	13	5	3	1	3	2	1	0	0	0.535	0	1	0	0	3	1
26	1	1	4	1	5	4	3	3	3	4	1	0	0	0.3358	0	0	0	0	3	1
26	1	1	5	2	20	5	1	2	4	2	5	1	0	0.3676	0	1	0	0	3	1
26	1	1	6	2	18	4	4	2	1	3	2	1	0	0.3674	0	1	0	0	3	1
26	1	1	7	2	15	4	4	2	3	5	1	0	0	0.3558	0	1	0	0	3	1
26	1	1	8	2	19	4	4	2	3	3	5	1	0	0.2706	0	1	0	0	3	1
26	1	1	9	2	11	5	3	5	1	0	0	0	0	0.9228	0	1	0	0	3	1
26	1	1	10	2	12	4	2	3	2	1	0	0	1	0.3345	0	0	0	0	3	1
26	1	1	11	1	1	4	3	4	1	0	0	0	1	1.073	1	0	0	0	3	1
26	1	1	12	2	17	5	1	4	2	3	5	1	0	0.1381	0	1	0	0	3	1
26	1	1	13	1	3	5	1	1	5	1	0	0	1	0.382	1	0	0	0	3	1
26	1	1	14	1	7	4	3	3	3	4	3	1	0	0.3324	0	0	0	0	3	1
26	1	1	15	2	16	5	1	4	2	5	1	0	0	0.3333	0	1	0	0	3	1
26	1	1	16	1	9	5	1	5	2	3	4	1	0	0.3288	0	0	0	0	3	1
26	1	1	17	1	8	5	5	2	3	4	3	1	0	0.2614	0	0	0	0	3	1
26	1	1	18	1	2	4	4	3	1	0	0	0	0	0.6348	0	0	0	0	3	1
26	1	1	19	1	10	5	1	1	5	2	4	1	1	0.2734	1	0	0	0	3	1
26	1	1	20	1	6	4	4	3	2	4	1	0	0	0.554	0	0	0	0	3	1
27	2	1	1	1	4	4	3	3	4	1	0	0	1	4.4736	0	0	0	0	2	2
27	2	1	2	2	17	5	1	4	2	3	5	1	1	0.8205	1	0	0	0	2	2
27	2	1	3	2	14	4	2	4	2	5	1	0	1	0.8647	1	0	0	0	2	2
27	2	1	4	2	11	5	3	5	1	0	0	0	1	2.8117	1	0	0	0	2	2
27	2	1	5	1	7	4	3	3	3	4	3	1	1	0.7006	0	0	0	0	2	2
27	2	1	6	1	10	5	1	1	5	2	4	1	1	0.6222	0	0	0	0	2	2
27	2	1	7	1	8	5	5	2	3	4	3	1	1	0.682	0	0	0	0	2	2
27	2	1	8	2	20	5	1	2	4	2	5	1	1	0.6023	1	0	0	0	2	2
27	2	1	9	1	1	4	3	4	1	0	0	0	1	0.6786	0	0	0	0	2	2
27	2	1	10	2	18	4	4	2	1	3	2	1	1	0.3876	1	0	0	0	2	2
27	2	1	11	1	5	4	3	3	3	4	1	0	1	0.5019	0	0	0	0	2	2
27	2	1	12	1	6	4	4	3	2	4	1	0	1	0.562	0	0	0	0	2	2
27	2	1	13	1	2	4	4	3	1	0	0	0	1	0.5966	0	0	0	0	2	2
27	2	1	14	2	15	4	4	2	3	5	1	0	1	0.5313	1	0	0	0	2	2
27	2	1	15	1	3	5	1	1	5	1	0	0	1	0.5552	0	0	0	0	2	2
27	2	1	16	2	19	4	4	2	3	3	5	1	1	0.501	1	0	0	0	2	2
27	2	1	17	2	13	5	3	1	3	2	1	0	1	0.5131	1	0	0	0	2	2
27	2	1	18	1	9	5	1	5	2	3	4	1	1	1.1493	0	0	0	0	2	2
27	2	1	19	2	12	4	2	3	2	1	0	0	1	0.4952	1	0	0	0	2	2
27	2	1	20	2	16	5	1	4	2	5	1	0	1	0.5928	1	0	0	0	2	2
28	1	1	1	1	5	4	3	3	3	4	1	0	1	5.798	1	0	0	0	5	2
28	1	1	2	1	10	5	1	1	5	2	4	1	1	2.036	1	0	0	0	5	2
28	1	1	3	2	12	4	2	3	2	1	0	0	0	2.067	0	1	0	0	5	2
28	1	1	4	2	11	5	3	5	1	0	0	0	0	0.919	0	1	0	0	5	2
28	1	1	5	2	14	4	2	4	2	5	1	0	0	2.745	0	1	0	0	5	2
28	1	1	6	2	15	4	4	2	3	5	1	0	1	0.784	0	0	0	0	5	2
28	1	1	7	1	8	5	5	2	3	4	3	1	0	1.006	0	0	0	0	5	2
28	1	1	8	1	2	4	4	3	1	0	0	0	1	2.883	1	0	0	0	5	2
28	1	1	9	1	1	4	3	4	1	0	0	0	1	1.981	1	0	0	0	5	2
28	1	1	10	2	17	5	1	4	2	3	5	1	0	0.701	0	1	0	0	5	2
28	1	1	11	2	19	4	4	2	3	3	5	1	0	0.491	0	1	0	0	5	2
28	1	1	12	1	7	4	3	3	3	4	3	1	1	1.238	1	0	0	0	5	2
28	1	1	13	2	13	5	3	1	3	2	1	0	0	0.472	0	1	0	0	5	2
28	1	1	14	1	9	5	1	5	2	3	4	1	0	0.724	0	0	0	0	5	2
28	1	1	15	1	6	4	4	3	2	4	1	0	0	0.437	0	0	0	0	5	2
28	1	1	16	2	18	4	4	2	1	3	2	1	0	0.451	0	1	0	0	5	2
28	1	1	17	1	3	5	1	1	5	1	0	0	1	0.808	1	0	0	0	5	2
28	1	1	18	1	4	4	3	3	4	1	0	0	1	0.785	1	0	0	0	5	2
28	1	1	19	2	20	5	1	2	4	2	5	1	0	0.731	0	1	0	0	5	2
28	1	1	20	2	16	5	1	4	2	5	1	0	0	0.606	0	1	0	0	5	2
29	1	1	1	1	10	5	1	1	5	2	4	1	0	6.7569	0	0	0	0	1	1
29	1	1	2	1	9	5	1	5	2	3	4	1	0	5.6999	0	0	0	0	1	1
29	1	1	3	2	13	5	3	1	3	2	1	0	0	4.0493	0	1	0	0	1	1
29	1	1	4	2	12	4	2	3	2	1	0	0	0	5.981	0	1	0	0	1	1
29	1	1	5	1	6	4	4	3	2	4	1	0	1	2.7679	1	0	0	0	1	1
29	1	1	6	2	18	4	4	2	1	3	2	1	0	7.4972	0	1	0	0	1	1
29	1	1	7	2	20	5	1	2	4	2	5	1	0	4.1715	0	1	0	0	1	1
29	1	1	8	1	5	4	3	3	3	4	1	0	1	6.5975	1	0	0	0	1	1
29	1	1	9	1	8	5	5	2	3	4	3	1	0	4.582	0	0	0	0	1	1
29	1	1	10	2	17	5	1	4	2	3	5	1	1	2.7836	0	0	0	0	1	1
29	1	1	11	2	11	5	3	5	1	0	0	0	0	6.8715	0	1	0	0	1	1
29	1	1	12	1	4	4	3	3	4	1	0	0	1	1.3873	1	0	0	0	1	1
29	1	1	13	1	1	4	3	4	1	0	0	0	1	1.8042	1	0	0	0	1	1
29	1	1	14	1	7	4	3	3	3	4	3	1	0	1.4326	0	0	0	0	1	1
29	1	1	15	2	16	5	1	4	2	5	1	0	1	1.3383	0	0	0	0	1	1
29	1	1	16	2	15	4	4	2	3	5	1	0	1	1.5105	0	0	0	0	1	1
29	1	1	17	2	19	4	4	2	3	3	5	1	0	1.6608	0	1	0	0	1	1
29	1	1	18	2	14	4	2	4	2	5	1	0	0	1.7675	0	1	0	0	1	1
29	1	1	19	1	2	4	4	3	1	0	0	0	0	3.7163	0	0	0	0	1	1
29	1	1	20	1	3	5	1	1	5	1	0	0	0	1.5248	0	0	0	0	1	1
30	2	1	1	1	9	5	1	5	2	3	4	1	1	6.1077	0	0	0	0	1	0
30	2	1	2	2	17	5	1	4	2	3	5	1	1	2.1124	1	0	0	0	1	0
30	2	1	3	1	1	4	3	4	1	0	0	0	0	2.1388	0	1	0	0	1	0
30	2	1	4	1	8	5	5	2	3	4	3	1	1	1.3737	0	0	0	0	1	0
30	2	1	5	2	12	4	2	3	2	1	0	0	1	2.7185	1	0	0	0	1	0
30	2	1	6	1	2	4	4	3	1	0	0	0	0	1.2967	0	1	0	0	1	0
30	2	1	7	2	14	4	2	4	2	5	1	0	1	1.0357	1	0	0	0	1	0
30	2	1	8	1	7	4	3	3	3	4	3	1	1	0.9886	0	0	0	0	1	0
30	2	1	9	2	15	4	4	2	3	5	1	0	0	1.4856	0	0	0	0	1	0
30	2	1	10	2	19	4	4	2	3	3	5	1	0	2.6409	0	0	0	0	1	0
30	2	1	11	1	3	5	1	1	5	1	0	0	1	3.1027	0	0	0	0	1	0
30	2	1	12	2	16	5	1	4	2	5	1	0	1	1.2198	1	0	0	0	1	0
30	2	1	13	2	20	5	1	2	4	2	5	1	1	1.8918	1	0	0	0	1	0
30	2	1	14	1	6	4	4	3	2	4	1	0	0	1.1209	0	1	0	0	1	0
30	2	1	15	1	10	5	1	1	5	2	4	1	0	1.3566	0	1	0	0	1	0
30	2	1	16	1	4	4	3	3	4	1	0	0	0	1.7434	0	1	0	0	1	0
30	2	1	17	2	18	4	4	2	1	3	2	1	1	0.9608	1	0	0	0	1	0
30	2	1	18	2	13	5	3	1	3	2	1	0	1	0.8744	1	0	0	0	1	0
30	2	1	19	1	5	4	3	3	3	4	1	0	1	1.0278	0	0	0	0	1	0
30	2	1	20	2	11	5	3	5	1	0	0	0	1	1.0193	1	0	0	0	1	0
31	1	2	1	2	12	4	2	3	2	1	0	0	1	1.9736	0	0	1	0	5	4
31	1	2	2	2	19	4	4	2	3	3	5	1	0	1.3641	0	0	0	0	5	4
31	1	2	3	2	13	5	3	1	3	2	1	0	0	1.2411	0	0	0	0	5	4
31	1	2	4	1	9	5	1	5	2	3	4	1	1	2.6586	0	0	0	0	5	4
31	1	2	5	1	5	4	3	3	3	4	1	0	0	0.8833	0	0	0	1	5	4
31	1	2	6	1	2	4	4	3	1	0	0	0	1	1.289	0	0	0	0	5	4
31	1	2	7	1	3	5	1	1	5	1	0	0	0	0.9999	0	0	0	1	5	4
31	1	2	8	2	15	4	4	2	3	5	1	0	0	0.6215	0	0	0	0	5	4
31	1	2	9	1	6	4	4	3	2	4	1	0	1	0.5005	0	0	0	0	5	4
31	1	2	10	1	8	5	5	2	3	4	3	1	1	0.8453	0	0	0	0	5	4
31	1	2	11	2	16	5	1	4	2	5	1	0	1	0.9788	0	0	1	0	5	4
31	1	2	12	1	1	4	3	4	1	0	0	0	0	0.5067	0	0	0	1	5	4
31	1	2	13	1	7	4	3	3	3	4	3	1	0	0.6206	0	0	0	1	5	4
31	1	2	14	2	18	4	4	2	1	3	2	1	1	0.7054	0	0	1	0	5	4
31	1	2	15	2	11	5	3	5	1	0	0	0	0	3.1666	0	0	0	0	5	4
31	1	2	16	1	4	4	3	3	4	1	0	0	0	5.2011	0	0	0	1	5	4
31	1	2	17	2	20	5	1	2	4	2	5	1	1	0.4718	0	0	1	0	5	4
31	1	2	18	2	17	5	1	4	2	3	5	1	1	0.6897	0	0	1	0	5	4
31	1	2	19	2	14	4	2	4	2	5	1	0	0	0.5022	0	0	0	0	5	4
31	1	2	20	1	10	5	1	1	5	2	4	1	1	0.9409	0	0	0	0	5	4
32	2	2	1	1	8	5	5	2	3	4	3	1	0	5.4331	0	0	0	0	1	4
32	2	2	2	2	18	4	4	2	1	3	2	1	0	2.9676	0	0	0	1	1	4
32	2	2	3	1	4	4	3	3	4	1	0	0	1	4.7618	0	0	1	0	1	4
32	2	2	4	2	12	4	2	3	2	1	0	0	1	2.1876	0	0	0	0	1	4
32	2	2	5	2	11	5	3	5	1	0	0	0	0	3.9355	0	0	0	1	1	4
32	2	2	6	2	20	5	1	2	4	2	5	1	1	4.0079	0	0	0	0	1	4
32	2	2	7	2	13	5	3	1	3	2	1	0	1	1.2006	0	0	0	0	1	4
32	2	2	8	1	5	4	3	3	3	4	1	0	0	1.4937	0	0	0	0	1	4
32	2	2	9	2	17	5	1	4	2	3	5	1	0	1.0048	0	0	0	1	1	4
32	2	2	10	1	3	5	1	1	5	1	0	0	1	1.2251	0	0	1	0	1	4
32	2	2	11	1	1	4	3	4	1	0	0	0	1	1.4935	0	0	1	0	1	4
32	2	2	12	1	9	5	1	5	2	3	4	1	0	2.0732	0	0	0	0	1	4
32	2	2	13	1	7	4	3	3	3	4	3	1	1	0.886	0	0	1	0	1	4
32	2	2	14	1	10	5	1	1	5	2	4	1	0	0.6974	0	0	0	0	1	4
32	2	2	15	2	16	5	1	4	2	5	1	0	0	1.1542	0	0	0	1	1	4
32	2	2	16	1	6	4	4	3	2	4	1	0	1	1.3627	0	0	1	0	1	4
32	2	2	17	2	15	4	4	2	3	5	1	0	1	1.185	0	0	0	0	1	4
32	2	2	18	2	14	4	2	4	2	5	1	0	0	2.5194	0	0	0	1	1	4
32	2	2	19	2	19	4	4	2	3	3	5	1	0	2.2846	0	0	0	1	1	4
32	2	2	20	1	2	4	4	3	1	0	0	0	0	1.2207	0	0	0	0	1	4
33	1	2	1	1	2	4	4	3	1	0	0	0	1	2.273	0	0	0	0	2	3
33	1	2	2	2	13	5	3	1	3	2	1	0	1	0.888	0	0	1	0	2	3
33	1	2	3	2	20	5	1	2	4	2	5	1	1	0.937	0	0	1	0	2	3
33	1	2	4	1	3	5	1	1	5	1	0	0	1	0.94	0	0	0	0	2	3
33	1	2	5	1	8	5	5	2	3	4	3	1	1	0.768	0	0	0	0	2	3
33	1	2	6	2	16	5	1	4	2	5	1	0	1	0.536	0	0	1	0	2	3
33	1	2	7	2	12	4	2	3	2	1	0	0	0	0.839	0	0	0	0	2	3
33	1	2	8	2	18	4	4	2	1	3	2	1	1	1.27	0	0	1	0	2	3
33	1	2	9	1	10	5	1	1	5	2	4	1	1	0.619	0	0	0	0	2	3
33	1	2	10	1	7	4	3	3	3	4	3	1	0	0.387	0	0	0	1	2	3
33	1	2	11	2	14	4	2	4	2	5	1	0	0	0.957	0	0	0	0	2	3
33	1	2	12	1	9	5	1	5	2	3	4	1	1	1.07	0	0	0	0	2	3
33	1	2	13	1	1	4	3	4	1	0	0	0	0	1.123	0	0	0	1	2	3
33	1	2	14	2	11	5	3	5	1	0	0	0	1	0.268	0	0	1	0	2	3
33	1	2	15	1	6	4	4	3	2	4	1	0	0	1.392	0	0	0	1	2	3
33	1	2	16	2	15	4	4	2	3	5	1	0	1	1.219	0	0	1	0	2	3
33	1	2	17	1	5	4	3	3	3	4	1	0	0	1.542	0	0	0	1	2	3
33	1	2	18	2	17	5	1	4	2	3	5	1	1	0.389	0	0	1	0	2	3
33	1	2	19	1	4	4	3	3	4	1	0	0	1	0.435	0	0	0	0	2	3
33	1	2	20	2	19	4	4	2	3	3	5	1	1	0.271	0	0	1	0	2	3
34	2	2	1	2	13	5	3	1	3	2	1	0	1	12.9527	0	0	0	0	2	4
34	2	2	2	1	1	4	3	4	1	0	0	0	1	11.1983	0	0	1	0	2	4
34	2	2	3	2	19	4	4	2	3	3	5	1	0	2.818	0	0	0	1	2	4
34	2	2	4	1	3	5	1	1	5	1	0	0	1	1.6547	0	0	1	0	2	4
34	2	2	5	2	17	5	1	4	2	3	5	1	1	10.7235	0	0	0	0	2	4
34	2	2	6	1	9	5	1	5	2	3	4	1	0	1.736	0	0	0	0	2	4
34	2	2	7	1	10	5	1	1	5	2	4	1	1	31.9554	0	0	1	0	2	4
34	2	2	8	2	18	4	4	2	1	3	2	1	1	13.2148	0	0	0	0	2	4
34	2	2	9	2	15	4	4	2	3	5	1	0	0	2.185	0	0	0	1	2	4
34	2	2	10	1	2	4	4	3	1	0	0	0	0	6.9873	0	0	0	0	2	4
34	2	2	11	2	14	4	2	4	2	5	1	0	1	23.7259	0	0	0	0	2	4
34	2	2	12	1	5	4	3	3	3	4	1	0	0	3.827	0	0	0	0	2	4
34	2	2	13	1	7	4	3	3	3	4	3	1	0	3.8636	0	0	0	0	2	4
34	2	2	14	1	8	5	5	2	3	4	3	1	1	1.8316	0	0	1	0	2	4
34	2	2	15	2	16	5	1	4	2	5	1	0	0	4.4697	0	0	0	1	2	4
34	2	2	16	1	6	4	4	3	2	4	1	0	0	4.3361	0	0	0	0	2	4
34	2	2	17	1	4	4	3	3	4	1	0	0	1	4.175	0	0	1	0	2	4
34	2	2	18	2	11	5	3	5	1	0	0	0	0	4.5293	0	0	0	1	2	4
34	2	2	19	2	12	4	2	3	2	1	0	0	1	18.2367	0	0	0	0	2	4
34	2	2	20	2	20	5	1	2	4	2	5	1	0	3.1342	0	0	0	1	2	4
35	2	2	1	1	8	5	5	2	3	4	3	1	0	2.7363	0	0	0	0	2	3
35	2	2	2	2	12	4	2	3	2	1	0	0	0	1.545	0	0	0	1	2	3
35	2	2	3	2	20	5	1	2	4	2	5	1	0	2.1015	0	0	0	1	2	3
35	2	2	4	2	11	5	3	5	1	0	0	0	1	3.3605	0	0	0	0	2	3
35	2	2	5	1	2	4	4	3	1	0	0	0	1	1.8353	0	0	1	0	2	3
35	2	2	6	2	19	4	4	2	3	3	5	1	1	1.9154	0	0	0	0	2	3
35	2	2	7	1	6	4	4	3	2	4	1	0	0	1.8517	0	0	0	0	2	3
35	2	2	8	2	14	4	2	4	2	5	1	0	1	1.3103	0	0	0	0	2	3
35	2	2	9	2	13	5	3	1	3	2	1	0	1	1.352	0	0	0	0	2	3
35	2	2	10	1	9	5	1	5	2	3	4	1	1	1.2522	0	0	1	0	2	3
35	2	2	11	1	4	4	3	3	4	1	0	0	1	1.2661	0	0	1	0	2	3
35	2	2	12	1	7	4	3	3	3	4	3	1	1	1.8308	0	0	1	0	2	3
35	2	2	13	1	1	4	3	4	1	0	0	0	1	1.701	0	0	1	0	2	3
35	2	2	14	2	16	5	1	4	2	5	1	0	0	2.1901	0	0	0	1	2	3
35	2	2	15	2	17	5	1	4	2	3	5	1	1	1.345	0	0	0	0	2	3
35	2	2	16	2	15	4	4	2	3	5	1	0	1	1.2231	0	0	0	0	2	3
35	2	2	17	2	18	4	4	2	1	3	2	1	1	1.26	0	0	0	0	2	3
35	2	2	18	1	5	4	3	3	3	4	1	0	0	1.628	0	0	0	0	2	3
35	2	2	19	1	10	5	1	1	5	2	4	1	1	1.3101	0	0	1	0	2	3
35	2	2	20	1	3	5	1	1	5	1	0	0	0	1.4192	0	0	0	0	2	3
36	2	2	1	1	2	4	4	3	1	0	0	0	1	39.0975	0	0	1	0	3	3
36	2	2	2	2	13	5	3	1	3	2	1	0	0	9.8864	0	0	0	1	3	3
36	2	2	3	2	15	4	4	2	3	5	1	0	0	3.3597	0	0	0	1	3	3
36	2	2	4	1	4	4	3	3	4	1	0	0	1	2.9298	0	0	1	0	3	3
36	2	2	5	2	11	5	3	5	1	0	0	0	1	1.3313	0	0	0	0	3	3
36	2	2	6	1	1	4	3	4	1	0	0	0	1	1.553	0	0	1	0	3	3
36	2	2	7	2	19	4	4	2	3	3	5	1	0	0.7551	0	0	0	1	3	3
36	2	2	8	1	8	5	5	2	3	4	3	1	1	2.4342	0	0	1	0	3	3
36	2	2	9	1	6	4	4	3	2	4	1	0	0	3.4497	0	0	0	0	3	3
36	2	2	10	2	17	5	1	4	2	3	5	1	1	1.1543	0	0	0	0	3	3
36	2	2	11	2	12	4	2	3	2	1	0	0	0	0.9243	0	0	0	1	3	3
36	2	2	12	2	20	5	1	2	4	2	5	1	0	0.8728	0	0	0	1	3	3
36	2	2	13	2	18	4	4	2	1	3	2	1	0	0.7957	0	0	0	1	3	3
36	2	2	14	2	16	5	1	4	2	5	1	0	1	0.8403	0	0	0	0	3	3
36	2	2	15	1	9	5	1	5	2	3	4	1	0	0.869	0	0	0	0	3	3
36	2	2	16	2	14	4	2	4	2	5	1	0	0	0.7465	0	0	0	1	3	3
36	2	2	17	1	10	5	1	1	5	2	4	1	1	1.7368	0	0	1	0	3	3
36	2	2	18	1	3	5	1	1	5	1	0	0	1	0.8037	0	0	1	0	3	3
36	2	2	19	1	7	4	3	3	3	4	3	1	1	0.7659	0	0	1	0	3	3
36	2	2	20	1	5	4	3	3	3	4	1	0	1	0.3849	0	0	1	0	3	3
37	2	2	1	1	2	4	4	3	1	0	0	0	0	10.5706	0	0	0	0	0	1
37	2	2	2	2	17	5	1	4	2	3	5	1	0	1.1834	0	0	0	1	0	1
37	2	2	3	1	1	4	3	4	1	0	0	0	1	1.1684	0	0	1	0	0	1
37	2	2	4	1	3	5	1	1	5	1	0	0	1	0.968	0	0	1	0	0	1
37	2	2	5	2	12	4	2	3	2	1	0	0	1	0.9616	0	0	0	0	0	1
37	2	2	6	1	9	5	1	5	2	3	4	1	1	0.9505	0	0	1	0	0	1
37	2	2	7	2	19	4	4	2	3	3	5	1	1	1.0723	0	0	0	0	0	1
37	2	2	8	1	8	5	5	2	3	4	3	1	1	1.9541	0	0	1	0	0	1
37	2	2	9	2	14	4	2	4	2	5	1	0	1	2.9833	0	0	0	0	0	1
37	2	2	10	1	5	4	3	3	3	4	1	0	0	0.8009	0	0	0	0	0	1
37	2	2	11	2	11	5	3	5	1	0	0	0	0	0.8966	0	0	0	1	0	1
37	2	2	12	2	13	5	3	1	3	2	1	0	0	0.7663	0	0	0	1	0	1
37	2	2	13	1	4	4	3	3	4	1	0	0	0	0.8859	0	0	0	0	0	1
37	2	2	14	2	20	5	1	2	4	2	5	1	0	1.4806	0	0	0	1	0	1
37	2	2	15	1	7	4	3	3	3	4	3	1	1	2.268	0	0	1	0	0	1
37	2	2	16	1	10	5	1	1	5	2	4	1	1	4.251	0	0	1	0	0	1
37	2	2	17	1	6	4	4	3	2	4	1	0	1	9.1794	0	0	1	0	0	1
37	2	2	18	2	16	5	1	4	2	5	1	0	1	1.6344	0	0	0	0	0	1
37	2	2	19	2	18	4	4	2	1	3	2	1	1	3.9828	0	0	0	0	0	1
37	2	2	20	2	15	4	4	2	3	5	1	0	1	3.9664	0	0	0	0	0	1
38	1	2	1	1	6	4	4	3	2	4	1	0	1	3.931	0	0	0	0	1	2
38	1	2	2	1	9	5	1	5	2	3	4	1	0	2.484	0	0	0	1	1	2
38	1	2	3	2	17	5	1	4	2	3	5	1	0	1.0005	0	0	0	0	1	2
38	1	2	4	2	20	5	1	2	4	2	5	1	1	0.6268	0	0	1	0	1	2
38	1	2	5	2	15	4	4	2	3	5	1	0	1	0.6173	0	0	1	0	1	2
38	1	2	6	2	18	4	4	2	1	3	2	1	1	1.1162	0	0	1	0	1	2
38	1	2	7	2	19	4	4	2	3	3	5	1	1	1.0965	0	0	1	0	1	2
38	1	2	8	1	10	5	1	1	5	2	4	1	0	1.0506	0	0	0	1	1	2
38	1	2	9	1	3	5	1	1	5	1	0	0	1	0.5133	0	0	0	0	1	2
38	1	2	10	2	14	4	2	4	2	5	1	0	0	1.2676	0	0	0	0	1	2
38	1	2	11	1	2	4	4	3	1	0	0	0	0	2.6522	0	0	0	1	1	2
38	1	2	12	1	7	4	3	3	3	4	3	1	0	1.2855	0	0	0	1	1	2
38	1	2	13	1	1	4	3	4	1	0	0	0	0	1.1503	0	0	0	1	1	2
38	1	2	14	1	8	5	5	2	3	4	3	1	1	0.3508	0	0	0	0	1	2
38	1	2	15	2	16	5	1	4	2	5	1	0	1	1.4005	0	0	1	0	1	2
38	1	2	16	1	4	4	3	3	4	1	0	0	1	0.8664	0	0	0	0	1	2
38	1	2	17	2	13	5	3	1	3	2	1	0	0	7.2006	0	0	0	0	1	2
38	1	2	18	2	12	4	2	3	2	1	0	0	0	0.7521	0	0	0	0	1	2
38	1	2	19	1	5	4	3	3	3	4	1	0	0	2.9001	0	0	0	1	1	2
38	1	2	20	2	11	5	3	5	1	0	0	0	0	1.2513	0	0	0	0	1	2
39	1	2	1	2	12	4	2	3	2	1	0	0	0	6.6639	0	0	0	0	0	1
39	1	2	2	2	17	5	1	4	2	3	5	1	0	3.7577	0	0	0	0	0	1
39	1	2	3	2	20	5	1	2	4	2	5	1	0	3.2231	0	0	0	0	0	1
39	1	2	4	1	6	4	4	3	2	4	1	0	0	1.5009	0	0	0	1	0	1
39	1	2	5	1	4	4	3	3	4	1	0	0	0	1.3091	0	0	0	1	0	1
39	1	2	6	2	11	5	3	5	1	0	0	0	1	2.2886	0	0	1	0	0	1
39	1	2	7	2	15	4	4	2	3	5	1	0	1	1.6716	0	0	1	0	0	1
39	1	2	8	2	13	5	3	1	3	2	1	0	0	1.1432	0	0	0	0	0	1
39	1	2	9	1	10	5	1	1	5	2	4	1	0	0.6462	0	0	0	1	0	1
39	1	2	10	1	5	4	3	3	3	4	1	0	0	0.7919	0	0	0	1	0	1
39	1	2	11	2	18	4	4	2	1	3	2	1	1	0.8056	0	0	1	0	0	1
39	1	2	12	1	3	5	1	1	5	1	0	0	0	1.1698	0	0	0	1	0	1
39	1	2	13	2	14	4	2	4	2	5	1	0	0	1.2613	0	0	0	0	0	1
39	1	2	14	1	9	5	1	5	2	3	4	1	0	1.1846	0	0	0	1	0	1
39	1	2	15	1	2	4	4	3	1	0	0	0	0	1.8467	0	0	0	1	0	1
39	1	2	16	1	7	4	3	3	3	4	3	1	0	0.4267	0	0	0	1	0	1
39	1	2	17	1	8	5	5	2	3	4	3	1	1	0.4423	0	0	0	0	0	1
39	1	2	18	1	1	4	3	4	1	0	0	0	0	1.935	0	0	0	1	0	1
39	1	2	19	2	19	4	4	2	3	3	5	1	1	0.7629	0	0	1	0	0	1
39	1	2	20	2	16	5	1	4	2	5	1	0	1	0.4978	0	0	1	0	0	1
40	1	2	1	2	11	5	3	5	1	0	0	0	1	4.0541	0	0	1	0	1	1
40	1	2	2	2	18	4	4	2	1	3	2	1	0	1.8003	0	0	0	0	1	1
40	1	2	3	1	2	4	4	3	1	0	0	0	1	1.888	0	0	0	0	1	1
40	1	2	4	1	8	5	5	2	3	4	3	1	1	1.6165	0	0	0	0	1	1
40	1	2	5	1	7	4	3	3	3	4	3	1	0	1.2853	0	0	0	1	1	1
40	1	2	6	2	15	4	4	2	3	5	1	0	0	1.6509	0	0	0	0	1	1
40	1	2	7	2	14	4	2	4	2	5	1	0	0	1.0863	0	0	0	0	1	1
40	1	2	8	2	17	5	1	4	2	3	5	1	0	1.1175	0	0	0	0	1	1
40	1	2	9	2	20	5	1	2	4	2	5	1	1	1.2337	0	0	1	0	1	1
40	1	2	10	2	13	5	3	1	3	2	1	0	0	1.5342	0	0	0	0	1	1
40	1	2	11	1	3	5	1	1	5	1	0	0	0	1.1417	0	0	0	1	1	1
40	1	2	12	1	9	5	1	5	2	3	4	1	0	1.1559	0	0	0	1	1	1
40	1	2	13	1	10	5	1	1	5	2	4	1	1	1.0245	0	0	0	0	1	1
40	1	2	14	1	1	4	3	4	1	0	0	0	1	1.0175	0	0	0	0	1	1
40	1	2	15	1	4	4	3	3	4	1	0	0	1	0.9678	0	0	0	0	1	1
40	1	2	16	2	19	4	4	2	3	3	5	1	0	1.3605	0	0	0	0	1	1
40	1	2	17	1	6	4	4	3	2	4	1	0	0	1.1034	0	0	0	1	1	1
40	1	2	18	2	16	5	1	4	2	5	1	0	1	1.151	0	0	1	0	1	1
40	1	2	19	2	12	4	2	3	2	1	0	0	1	0.9173	0	0	1	0	1	1
40	1	2	20	1	5	4	3	3	3	4	1	0	0	1.106	0	0	0	1	1	1
