# Supplementary material for: Concurrent visual sequence learning
Source: Psychol Res. 2023 Mar 22;87(7):2086–100. doi: 10.1007/s00426-023-01810-2 (PMC10457409; doi:10.1007/s00426-023-01810-2)
Supplement: Supplementary file 3 — Supplementary file3 (XLSX 540 KB) [file 426_2023_1810_MOESM3_ESM.xlsx]

## Sheet: Tabelle1
subject_number	condition	trial	Y	X	C	B	N	M	color target	shape target	amot	antw	error	trial_after_error	wagering_trial	wager	profit	response_time
1	1	1	4	1	5	2	6	3	2	0	4	5	1	0	0	0	0	735.294
1	1	2	5	2	3	1	6	4	5	0	1	1	0	1	0	0	0	735.282
1	1	3	5	3	1	6	4	2	3	0	2	2	0	0	0	0	0	687.489
1	1	4	2	5	4	1	6	3	4	0	3	3	0	0	0	0	0	735.408
1	1	5	2	5	4	1	6	3	1	0	4	4	0	0	1	0.5	0.5	2815.41
1	1	6	5	3	6	2	4	1	5	0	1	1	0	0	0	0	0.5	2095.41
1	1	7	1	4	6	5	2	3	6	0	3	3	0	0	0	0	0.5	1887.45
1	1	8	4	2	3	5	6	1	2	0	2	2	0	0	0	0	0.5	767.445
1	1	9	3	4	1	6	2	5	5	0	6	6	0	0	0	0	0.5	1487.44
1	1	10	3	4	1	6	2	5	3	0	1	4	1	0	1	0.5	0	2159.39
1	1	11	5	2	1	4	6	3	4	0	4	4	0	1	0	0	0	3247.43
1	1	12	2	3	1	6	5	4	1	0	3	3	0	0	0	0	0	911.383
1	1	13	6	2	5	1	3	4	5	0	3	3	0	0	0	0	0	2559.41
1	1	14	6	2	5	1	3	4	6	0	1	5	1	0	1	0.5	-0.5	6047.4
1	1	15	4	2	6	5	1	3	2	0	2	2	0	1	0	0	-0.5	2335.47
1	1	16	2	4	5	3	6	1	5	0	3	3	0	0	0	0	-0.5	2639.37
1	1	17	1	6	2	5	3	4	3	0	5	5	0	0	0	0	-0.5	5103.4
1	1	18	6	1	2	4	5	3	4	0	4	4	0	0	0	0	-0.5	2975.43
1	1	19	6	1	2	4	5	3	1	0	2	2	0	0	1	0.5	0	2751.41
1	1	20	6	4	5	2	1	3	5	0	3	3	0	0	0	0	0	1695.47
1	1	21	6	2	1	5	3	4	6	0	1	1	0	0	0	0	0	847.447
1	1	22	1	5	4	2	3	6	2	0	4	4	0	0	0	0	0	1663.44
1	1	23	1	5	4	2	3	6	5	0	2	5	1	0	1	0.5	-0.5	2463.42
1	1	24	1	2	3	6	5	4	3	0	3	3	0	1	0	0	-0.5	3631.42
1	1	25	1	6	2	5	4	3	4	0	5	5	0	0	0	0	-0.5	1247.39
1	1	26	1	6	2	5	4	3	1	0	1	2	1	0	1	0.5	-1	1663.43
1	1	27	1	3	2	4	6	5	5	0	6	6	0	1	0	0	-1	2575.48
1	1	28	3	4	5	6	1	2	6	0	4	4	0	0	0	0	-1	1039.39
1	1	29	5	2	4	1	6	3	2	0	2	2	0	0	0	0	-1	687.424
1	1	30	5	2	4	1	6	3	5	0	1	4	1	0	1	0.5	-1.5	2799.5
1	1	31	2	6	3	4	1	5	3	0	3	3	0	1	0	0	-1.5	1647.42
1	1	32	5	3	6	2	1	4	4	0	6	6	0	0	0	0	-1.5	1375.47
1	1	33	3	2	5	1	6	4	1	0	4	4	0	0	0	0	-1.5	863.418
1	1	34	4	6	1	3	5	2	5	0	5	5	0	0	0	0	-1.5	1599.5
1	1	35	3	4	6	1	5	2	6	0	3	3	0	0	0	0	-1.5	2287.42
1	1	36	2	6	3	5	1	4	2	0	1	1	0	0	0	0	-1.5	1071.46
1	1	37	1	6	3	4	2	5	5	0	6	6	0	0	0	0	-1.5	1791.42
1	1	38	2	6	4	5	3	1	3	0	5	5	0	0	0	0	-1.5	927.411
1	1	39	2	6	4	5	3	1	4	0	3	3	0	0	1	0.5	-1	2159.44
1	1	40	6	2	4	3	1	5	1	0	5	5	0	0	0	0	-1	2911.44
1	1	41	4	1	3	6	2	5	5	0	6	6	0	0	0	0	-1	1263.39
1	1	42	6	3	2	5	1	4	6	0	1	1	0	0	0	0	-1	2735.44
1	1	43	6	3	2	5	1	4	2	0	3	2	1	0	1	0.5	-1.5	1663.41
1	1	44	5	4	6	1	3	2	5	0	1	1	0	1	0	0	-1.5	3839.41
1	1	45	5	4	6	2	1	3	3	0	6	6	0	0	0	0	-1.5	1071.42
1	1	46	2	4	3	5	6	1	4	0	2	2	0	0	0	0	-1.5	671.528
1	1	47	6	4	5	2	1	3	1	0	5	5	0	0	0	0	-1.5	4623.41
1	1	48	6	4	5	2	1	3	5	0	3	4	1	0	1	0.5	-2	1183.31
1	1	49	6	3	1	4	2	5	6	0	1	1	0	1	0	0	-2	1631.42
1	1	50	6	2	5	3	4	1	2	0	2	2	0	0	0	0	-2	1743.43
1	1	51	6	3	2	5	4	1	5	0	4	4	0	0	0	0	-2	1503.46
1	1	52	1	6	3	5	2	4	3	0	3	3	0	0	0	0	-2	1103.44
1	1	53	1	6	3	5	2	4	4	0	6	6	0	0	1	0.5	-1.5	1663.43
1	1	54	3	1	2	5	6	4	1	0	2	2	0	0	0	0	-1.5	1199.5
1	1	55	4	2	3	5	6	1	5	0	4	4	0	0	0	0	-1.5	1199.42
1	1	56	5	2	6	3	1	4	6	0	3	3	0	0	0	0	-1.5	751.459
1	1	57	2	4	6	1	3	5	2	0	1	1	0	0	0	0	-1.5	2575.37
1	1	58	1	3	6	2	5	4	5	0	5	5	0	0	0	0	-1.5	2799.42
1	1	59	6	4	1	3	5	2	3	0	4	4	0	0	0	0	-1.5	1887.42
1	1	60	1	4	2	6	3	5	4	0	2	4	1	0	1	0.5	-2	2655.39
1	1	61	1	5	3	4	6	2	1	0	1	1	0	1	0	0	-2	3391.43
1	1	62	6	1	3	4	2	5	5	0	6	6	0	0	0	0	-2	1935.37
1	1	63	5	2	4	1	3	6	6	0	6	6	0	0	0	0	-2	2431.4
1	1	64	5	2	4	1	3	6	2	0	2	3	1	0	1	0.5	-2.5	2159.44
1	1	65	5	1	6	2	4	3	5	0	1	1	0	1	0	0	-2.5	2463.41
1	1	66	1	4	2	5	6	3	3	0	6	6	0	0	0	0	-2.5	1023.47
1	1	67	3	6	2	5	4	1	4	0	5	5	0	0	0	0	-2.5	975.423
1	1	68	6	5	4	3	2	1	1	0	6	6	0	0	0	0	-2.5	2703.46
1	1	69	6	5	4	3	2	1	5	0	2	2	0	0	1	0.5	-2	1103.43
1	1	70	6	1	5	3	2	4	6	0	1	1	0	0	0	0	-2	2255.5
1	1	71	5	3	4	2	6	1	2	0	4	4	0	0	0	0	-2	959.409
1	1	72	2	4	6	1	5	3	5	0	5	5	0	0	0	0	-2	895.449
1	1	73	5	3	4	2	1	6	3	0	2	6	1	0	0	0	-2	5471.36
1	1	74	5	3	4	2	1	6	4	0	3	1	1	1	1	0.5	-2.5	543.419
1	1	75	5	2	3	1	4	6	1	0	4	4	0	1	0	0	-2.5	1391.48
1	1	76	6	5	3	4	2	1	5	0	2	2	0	0	0	0	-2.5	1311.43
1	1	77	6	5	3	4	2	1	6	0	1	1	0	0	1	0.5	-2	1759.46
1	1	78	4	1	2	3	5	6	2	0	3	3	0	0	0	0	-2	1455.5
1	1	79	1	4	6	2	3	5	5	0	6	6	0	0	0	0	-2	2175.42
1	1	80	4	1	5	2	3	6	3	0	5	5	0	0	0	0	-2	991.429
1	1	81	4	1	2	5	3	6	4	0	1	1	0	0	0	0	-2	719.5
1	1	82	4	1	2	5	3	6	1	0	2	4	1	0	1	0.5	-2.5	1135.46
1	1	83	5	4	6	3	2	1	5	0	1	3	1	1	0	0	-2.5	2719.49
1	1	84	4	1	5	2	6	3	6	0	5	5	0	1	0	0	-2.5	3711.39
1	1	85	4	1	2	6	3	5	2	0	3	3	0	0	0	0	-2.5	1167.35
1	1	86	6	2	4	3	1	5	5	0	6	6	0	0	0	0	-2.5	1567.46
1	1	87	6	2	4	3	1	5	3	0	4	5	1	0	1	0.5	-3	863.449
1	1	88	2	3	6	5	4	1	4	0	5	5	0	1	0	0	-3	1263.45
1	1	89	4	1	3	2	6	5	1	0	2	2	0	0	0	0	-3	1247.5
1	1	90	5	1	2	4	3	6	5	0	1	1	0	0	0	0	-3	4575.33
1	1	91	2	4	3	5	1	6	6	0	6	3	1	0	0	0	-3	6815.33
1	1	92	2	4	1	6	5	3	2	0	1	1	0	1	0	0	-3	2031.43
1	1	93	2	4	1	6	5	3	5	0	5	5	0	0	1	0.5	-2.5	1375.43
1	1	94	1	3	4	5	6	2	3	0	2	2	0	0	0	0	-2.5	1039.52
1	1	95	5	2	1	4	3	6	4	0	4	4	0	0	0	0	-2.5	735.4
1	1	96	6	2	1	4	3	5	1	0	3	3	0	0	0	0	-2.5	799.475
1	1	97	4	5	1	2	3	6	5	0	2	2	0	0	0	0	-2.5	799.351
1	1	98	4	5	1	2	3	6	6	0	6	5	1	0	1	0.5	-3	1215.48
1	1	99	1	2	6	4	5	3	2	0	2	2	0	1	0	0	-3	959.493
1	1	100	6	1	2	3	5	4	5	0	5	5	0	0	0	0	-3	943.448
2	1	1	2	5	3	1	4	6	5	0	2	2	0	0	0	0	0	1254.74
2	1	2	4	1	5	3	6	2	2	0	6	6	0	0	0	0	0	719.384
2	1	3	4	3	2	5	1	6	4	0	1	1	0	0	0	0	0	879.405
2	1	4	5	1	4	3	6	2	6	0	5	5	0	0	0	0	0	783.44
2	1	5	5	1	4	3	6	2	3	0	4	3	1	0	1	0.5	-0.5	15342.8
2	1	6	6	4	3	2	5	1	1	0	6	6	0	1	0	0	-0.5	927.444
2	1	7	3	6	5	2	4	1	5	0	3	1	1	0	0	0	-0.5	719.525
2	1	8	6	1	5	2	3	4	2	0	4	4	0	1	0	0	-0.5	911.44
2	1	9	3	1	2	6	4	5	4	0	5	5	0	0	0	0	-0.5	2063.45
2	1	10	3	1	2	6	4	5	6	0	4	2	1	0	1	0.5	-1	6543.26
2	1	11	6	1	3	4	2	5	3	0	3	3	0	1	0	0	-1	1151.5
2	1	12	1	2	3	6	4	5	1	0	1	1	0	0	0	0	-1	1359.17
2	1	13	6	1	5	3	4	2	5	0	3	3	0	0	0	0	-1	1375.49
2	1	14	6	1	5	3	4	2	2	0	6	1	1	0	1	0.5	-1.5	2719.29
2	1	15	6	3	4	1	5	2	4	0	3	3	0	1	0	0	-1.5	1295.44
2	1	16	4	6	1	2	3	5	6	0	2	2	0	0	0	0	-1.5	847.408
2	1	17	1	5	4	2	3	6	3	0	5	5	0	0	0	0	-1.5	1519.43
2	1	18	5	4	2	1	6	3	1	0	4	4	0	0	0	0	-1.5	927.395
2	1	19	5	4	2	1	6	3	5	0	1	3	1	0	1	0.5	-2	6831.23
2	1	20	4	2	5	6	3	1	2	0	2	2	0	1	0	0	-2	1183.29
2	1	21	5	3	1	4	2	6	4	0	4	4	0	0	0	0	-2	1039.48
2	1	22	2	6	1	5	4	3	6	0	2	5	1	0	0	0	-2	6511.29
2	1	23	2	6	1	5	4	3	3	0	6	5	1	1	1	0.5	-2.5	1583.36
2	1	24	6	4	1	3	2	5	1	0	3	3	0	1	0	0	-2.5	1103.5
2	1	25	3	1	4	2	6	5	5	0	6	6	0	0	0	0	-2.5	2351.3
2	1	26	3	1	4	2	6	5	2	0	4	1	1	0	1	0.5	-3	4719.3
2	1	27	1	2	3	6	4	5	4	0	5	5	0	1	0	0	-3	1087.47
2	1	28	6	2	1	4	3	5	6	0	1	1	0	0	0	0	-3	1055.42
2	1	29	6	5	1	3	2	4	3	0	4	4	0	0	0	0	-3	2463.41
2	1	30	6	5	1	3	2	4	1	0	3	3	0	0	1	0.5	-2.5	9071.15
2	1	31	4	3	2	1	6	5	5	0	6	6	0	0	0	0	-2.5	1087.46
2	1	32	3	6	5	2	4	1	2	0	4	4	0	0	0	0	-2.5	1727.39
2	1	33	1	3	5	6	4	2	4	0	5	5	0	0	0	0	-2.5	1135.48
2	1	34	1	6	2	3	4	5	6	0	2	2	0	0	0	0	-2.5	1359.42
2	1	35	5	4	3	2	1	6	3	0	3	3	0	0	0	0	-2.5	1951.42
2	1	36	2	5	6	1	3	4	1	0	4	4	0	0	0	0	-2.5	1919.44
2	1	37	5	4	2	6	3	1	5	0	1	1	0	0	0	0	-2.5	1119.46
2	1	38	1	3	2	5	6	4	2	0	3	3	0	0	0	0	-2.5	1215.45
2	1	39	1	3	2	5	6	4	4	0	6	2	1	0	1	0.5	-3	1567.44
2	1	40	5	4	2	1	6	3	6	0	5	5	0	1	0	0	-3	1087.45
2	1	41	5	6	4	3	1	2	3	0	4	4	0	0	0	0	-3	927.413
2	1	42	4	5	1	2	3	6	1	0	3	3	0	0	0	0	-3	1055.41
2	1	43	4	5	1	2	3	6	5	0	2	2	0	0	1	0.5	-2.5	1279.45
2	1	44	6	5	3	4	2	1	2	0	5	5	0	0	0	0	-2.5	1375.43
2	1	45	6	3	4	2	1	5	4	0	3	3	0	0	0	0	-2.5	1151.41
2	1	46	4	5	1	3	2	6	6	0	6	6	0	0	0	0	-2.5	1263.48
2	1	47	6	2	3	1	4	5	3	0	3	3	0	0	0	0	-2.5	959.467
2	1	48	6	2	3	1	4	5	1	0	4	1	1	0	1	0.5	-3	5199.19
2	1	49	2	5	1	4	3	6	5	0	2	2	0	1	0	0	-3	1183.48
2	1	50	6	1	2	4	5	3	2	0	3	3	0	0	0	0	-3	1135.41
2	1	51	5	3	1	6	2	4	4	0	6	6	0	0	0	0	-3	1119.46
2	1	52	1	6	2	5	3	4	6	0	2	2	0	0	0	0	-3	1135.43
2	1	53	1	6	2	5	3	4	3	0	5	1	1	0	1	0.5	-3.5	2799.42
2	1	54	6	4	1	5	3	2	1	0	3	3	0	1	0	0	-3.5	687.498
2	1	55	4	2	1	3	6	5	5	0	6	6	0	0	0	0	-3.5	895.484
2	1	56	6	4	5	2	1	3	2	0	4	4	0	0	0	0	-3.5	911.439
2	1	57	4	1	3	6	2	5	4	0	1	1	0	0	0	0	-3.5	959.455
2	1	58	2	5	6	4	3	1	6	0	3	3	0	0	0	0	-3.5	1119.43
2	1	59	6	2	4	5	1	3	3	0	6	6	0	0	0	0	-3.5	2751.37
2	1	60	6	2	4	5	1	3	1	0	5	6	1	0	1	0.5	-4	3359.39
2	1	61	5	4	3	6	1	2	5	0	1	1	0	1	0	0	-4	1071.48
2	1	62	4	5	2	1	3	6	2	0	3	3	0	0	0	0	-4	1183.44
2	1	63	4	3	5	2	6	1	4	0	1	1	0	0	0	0	-4	1183.32
2	1	64	4	3	5	2	6	1	6	0	5	3	1	0	1	0.5	-4.5	911.584
2	1	65	5	2	6	1	4	3	3	0	6	6	0	1	0	0	-4.5	927.474
2	1	66	1	2	5	4	3	6	1	0	1	1	0	0	0	0	-4.5	735.455
2	1	67	6	5	4	1	3	2	5	0	2	2	0	0	0	0	-4.5	975.436
2	1	68	2	1	5	4	6	3	2	0	1	1	0	0	0	0	-4.5	1071.3
2	1	69	2	1	5	4	6	3	4	0	4	6	1	0	1	0.5	-5	2079.45
2	1	70	2	4	3	5	6	1	6	0	5	5	0	1	0	0	-5	1055.42
2	1	71	1	3	5	2	6	4	3	0	2	2	0	0	0	0	-5	1135.44
2	1	72	3	6	4	5	2	1	1	0	6	6	0	0	0	0	-5	831.484
2	1	73	4	6	1	5	2	3	5	0	4	4	0	0	0	0	-5	1183.48
2	1	74	4	6	1	5	2	3	2	0	5	4	1	0	1	0.5	-5.5	1759.41
2	1	75	1	4	2	6	5	3	4	0	2	3	1	1	0	0	-5.5	4191.39
2	1	76	4	5	1	3	2	6	6	0	6	5	1	1	0	0	-5.5	4991.18
2	1	77	4	5	1	3	2	6	3	0	4	5	1	1	1	0.5	-6	847.491
2	1	78	3	4	5	2	6	1	1	0	6	6	0	1	0	0	-6	3439.34
2	1	79	3	2	4	1	5	6	5	0	5	5	0	0	0	0	-6	1263.46
2	1	80	1	5	2	6	4	3	2	0	3	3	0	0	0	0	-6	783.436
2	1	81	2	5	1	3	4	6	4	0	5	6	1	0	0	0	-6	831.482
2	1	82	2	5	1	3	4	6	6	0	6	2	1	1	1	0.5	-6.5	7743.18
2	1	83	6	3	4	1	5	2	3	0	2	2	0	1	0	0	-6.5	847.511
2	1	84	1	5	2	6	4	3	1	0	1	1	0	0	0	0	-6.5	767.444
2	1	85	5	1	3	6	2	4	5	0	1	1	0	0	0	0	-6.5	991.438
2	1	86	1	4	6	5	2	3	2	0	5	6	1	0	0	0	-6.5	831.474
2	1	87	1	4	6	5	2	3	4	0	2	6	1	1	1	0.5	-7	4815.27
2	1	88	5	2	3	6	1	4	6	0	4	4	0	1	0	0	-7	1055.49
2	1	89	3	5	6	4	1	2	3	0	1	1	0	0	0	0	-7	863.471
2	1	90	5	4	3	2	1	6	1	0	5	5	0	0	0	0	-7	1359.4
2	1	91	6	1	2	3	4	5	5	0	6	6	0	0	0	0	-7	863.485
2	1	92	2	1	6	4	5	3	2	0	1	1	0	0	0	0	-7	847.404
2	1	93	2	1	6	4	5	3	4	0	4	3	1	0	1	0.5	-7.5	1215.46
2	1	94	4	1	3	2	6	5	6	0	5	5	0	1	0	0	-7.5	975.386
2	1	95	3	4	2	6	1	5	3	0	1	1	0	0	0	0	-7.5	895.457
2	1	96	5	4	6	2	3	1	1	0	6	6	0	0	0	0	-7.5	863.629
2	1	97	6	3	2	5	4	1	5	0	4	4	0	0	0	0	-7.5	991.309
2	1	98	6	3	2	5	4	1	2	0	3	3	0	0	1	0.5	-7	815.416
2	1	99	1	3	2	6	4	5	4	0	5	5	0	0	0	0	-7	991.409
2	1	100	1	2	4	6	3	5	6	0	4	2	1	0	0	0	-7	4191.37
3	2	1	2	5	3	1	4	6	0	5	2	2	0	1	0	0	0	1216.88
3	2	2	4	1	5	3	6	2	0	2	6	6	0	0	0	0	0	1085
3	2	3	4	3	2	5	1	6	0	4	1	1	0	0	0	0	0	1053.11
3	2	4	5	1	4	3	6	2	0	6	5	5	0	0	0	0	0	1069.07
3	2	5	5	1	4	3	6	2	0	3	4	4	0	0	1	0.5	0.5	2157.04
3	2	6	6	4	3	2	5	1	0	1	6	6	0	0	0	0	0.5	1725
3	2	7	3	6	5	2	4	1	0	5	3	3	0	0	0	0	0.5	1069.14
3	2	8	6	1	5	2	3	4	0	2	4	5	1	0	0	0	0.5	2061.01
3	2	9	3	1	2	6	4	5	0	4	5	6	1	1	0	0	0.5	1725
3	2	10	3	1	2	6	4	5	0	6	4	6	1	1	1	0.01	0.49	2733.02
3	2	11	6	1	3	4	2	5	0	3	3	3	0	1	0	0	0.49	1085.1
3	2	12	1	2	3	6	4	5	0	1	1	1	0	0	0	0	0.49	1197.04
3	2	13	6	1	5	3	4	2	0	5	3	3	0	0	0	0	0.49	1501.11
3	2	14	6	1	5	3	4	2	0	2	6	5	1	0	1	0.01	0.48	3981
3	2	15	6	3	4	1	5	2	0	4	3	3	0	1	0	0	0.48	1181.09
3	2	16	4	6	1	2	3	5	0	6	2	2	0	0	0	0	0.48	957.034
3	2	17	1	5	4	2	3	6	0	3	5	5	0	0	0	0	0.48	3901
3	2	18	5	4	2	1	6	3	0	1	4	4	0	0	0	0	0.48	1517.06
3	2	19	5	4	2	1	6	3	0	5	1	6	1	0	1	0.5	-0.02	4316.93
3	2	20	4	2	5	6	3	1	0	2	2	2	0	1	0	0	-0.02	1309.13
3	2	21	5	3	1	4	2	6	0	4	4	4	0	0	0	0	-0.02	1021.05
3	2	22	2	6	1	5	4	3	0	6	2	2	0	0	0	0	-0.02	2189
3	2	23	2	6	1	5	4	3	0	3	6	3	1	0	1	0.01	-0.03	5661.02
3	2	24	6	4	1	3	2	5	0	1	3	3	0	1	0	0	-0.03	989.117
3	2	25	3	1	4	2	6	5	0	5	6	6	0	0	0	0	-0.03	1836.98
3	2	26	3	1	4	2	6	5	0	2	4	5	1	0	1	0.01	-0.04	1597.15
3	2	27	1	2	3	6	4	5	0	4	5	5	0	1	0	0	-0.04	941.048
3	2	28	6	2	1	4	3	5	0	6	1	1	0	0	0	0	-0.04	1213.11
3	2	29	6	5	1	3	2	4	0	3	4	4	0	0	0	0	-0.04	861.133
3	2	30	6	5	1	3	2	4	0	1	3	2	1	0	1	0.5	-0.54	1997.07
3	2	31	4	3	2	1	6	5	0	5	6	6	0	1	0	0	-0.54	1357.12
3	2	32	3	6	5	2	4	1	0	2	4	4	0	0	0	0	-0.54	1213.04
3	2	33	1	3	5	6	4	2	0	4	5	5	0	0	0	0	-0.54	1053.12
3	2	34	1	6	2	3	4	5	0	6	2	2	0	0	0	0	-0.54	1341.08
3	2	35	5	4	3	2	1	6	0	3	3	1	1	0	0	0	-0.54	2973.01
3	2	36	2	5	6	1	3	4	0	1	4	4	0	1	0	0	-0.54	1277.07
3	2	37	5	4	2	6	3	1	0	5	1	1	0	0	0	0	-0.54	1197.1
3	2	38	1	3	2	5	6	4	0	2	3	2	1	0	0	0	-0.54	1261.02
3	2	39	1	3	2	5	6	4	0	4	6	2	1	1	1	0.5	-1.04	3325.1
3	2	40	5	4	2	1	6	3	0	6	5	5	0	1	0	0	-1.04	1469.08
3	2	41	5	6	4	3	1	2	0	3	4	4	0	0	0	0	-1.04	1405.09
3	2	42	4	5	1	2	3	6	0	1	3	3	0	0	0	0	-1.04	1053.06
3	2	43	4	5	1	2	3	6	0	5	2	2	0	0	1	0.5	-0.54	5468.95
3	2	44	6	5	3	4	2	1	0	2	5	5	0	0	0	0	-0.54	2653.06
3	2	45	6	3	4	2	1	5	0	4	3	3	0	0	0	0	-0.54	1053.08
3	2	46	4	5	1	3	2	6	0	6	6	6	0	0	0	0	-0.54	1421.11
3	2	47	6	2	3	1	4	5	0	3	3	3	0	0	0	0	-0.54	1309.1
3	2	48	6	2	3	1	4	5	0	1	4	2	1	0	1	0.01	-0.55	7420.86
3	2	49	2	5	1	4	3	6	0	5	2	2	0	1	0	0	-0.55	1261.07
3	2	50	6	1	2	4	5	3	0	2	3	3	0	0	0	0	-0.55	1117.16
3	2	51	5	3	1	6	2	4	0	4	6	6	0	0	0	0	-0.55	1501.06
3	2	52	1	6	2	5	3	4	0	6	2	2	0	0	0	0	-0.55	1757.07
3	2	53	1	6	2	5	3	4	0	3	5	5	0	0	1	0.01	-0.54	21820.4
3	2	54	6	4	1	5	3	2	0	1	3	3	0	0	0	0	-0.54	1021.11
3	2	55	4	2	1	3	6	5	0	5	6	6	0	0	0	0	-0.54	1101.1
3	2	56	6	4	5	2	1	3	0	2	4	5	1	0	0	0	-0.54	1581.07
3	2	57	4	1	3	6	2	5	0	4	1	1	0	1	0	0	-0.54	1517.07
3	2	58	2	5	6	4	3	1	0	6	3	3	0	0	0	0	-0.54	1117.07
3	2	59	6	2	4	5	1	3	0	3	6	6	0	0	0	0	-0.54	1373.1
3	2	60	6	2	4	5	1	3	0	1	5	2	1	0	1	0.01	-0.55	4876.98
3	2	61	5	4	3	6	1	2	0	5	1	1	0	1	0	0	-0.55	1260.98
3	2	62	4	5	2	1	3	6	0	2	3	1	1	0	0	0	-0.55	202.92
3	2	63	4	3	5	2	6	1	0	4	1	1	0	1	0	0	-0.55	2367.31
3	2	64	4	3	5	2	6	1	0	6	5	2	1	0	1	0.5	-1.05	3356.94
3	2	65	5	2	6	1	4	3	0	3	6	6	0	1	0	0	-1.05	1773.05
3	2	66	1	2	5	4	3	6	0	1	1	1	0	0	0	0	-1.05	3277.02
3	2	67	6	5	4	1	3	2	0	5	2	2	0	0	0	0	-1.05	1421.12
3	2	68	2	1	5	4	6	3	0	2	1	1	0	0	0	0	-1.05	1805.04
3	2	69	2	1	5	4	6	3	0	4	4	4	0	0	1	0.01	-1.04	5756.97
3	2	70	2	4	3	5	6	1	0	6	5	5	0	0	0	0	-1.04	2957.05
3	2	71	1	3	5	2	6	4	0	3	2	2	0	0	0	0	-1.04	1389.06
3	2	72	3	6	4	5	2	1	0	1	6	6	0	0	0	0	-1.04	1613.04
3	2	73	4	6	1	5	2	3	0	5	4	4	0	0	0	0	-1.04	3645.03
3	2	74	4	6	1	5	2	3	0	2	5	1	1	0	1	0.5	-1.54	4364.99
3	2	75	1	4	2	6	5	3	0	4	2	2	0	1	0	0	-1.54	1213.12
3	2	76	4	5	1	3	2	6	0	6	6	6	0	0	0	0	-1.54	2205.05
3	2	77	4	5	1	3	2	6	0	3	4	4	0	0	1	0.01	-1.53	3789.01
3	2	78	3	4	5	2	6	1	0	1	6	6	0	0	0	0	-1.53	1549.11
3	2	79	3	2	4	1	5	6	0	5	5	5	0	0	0	0	-1.53	1901.05
3	2	80	1	5	2	6	4	3	0	2	3	3	0	0	0	0	-1.53	2493.04
3	2	81	2	5	1	3	4	6	0	4	5	5	0	0	0	0	-1.53	1917.03
3	2	82	2	5	1	3	4	6	0	6	6	2	1	0	1	0.5	-2.03	5197
3	2	83	6	3	4	1	5	2	0	3	2	2	0	1	0	0	-2.03	1453.13
3	2	84	1	5	2	6	4	3	0	1	1	1	0	0	0	0	-2.03	2685.04
3	2	85	5	1	3	6	2	4	0	5	1	1	0	0	0	0	-2.03	2413.06
3	2	86	1	4	6	5	2	3	0	2	5	5	0	0	0	0	-2.03	1485.07
3	2	87	1	4	6	5	2	3	0	4	2	6	1	0	1	0.5	-2.53	1261.02
3	2	88	5	2	3	6	1	4	0	6	4	4	0	1	0	0	-2.53	1149.17
3	2	89	3	5	6	4	1	2	0	3	1	1	0	0	0	0	-2.53	1709.05
3	2	90	5	4	3	2	1	6	0	1	5	5	0	0	0	0	-2.53	1837.1
3	2	91	6	1	2	3	4	5	0	5	6	6	0	0	0	0	-2.53	2269.02
3	2	92	2	1	6	4	5	3	0	2	1	1	0	0	0	0	-2.53	1469.08
3	2	93	2	1	6	4	5	3	0	4	4	2	1	0	1	0.5	-3.03	1309.12
3	2	94	4	1	3	2	6	5	0	6	5	5	0	1	0	0	-3.03	2637.06
3	2	95	3	4	2	6	1	5	0	3	1	1	0	0	0	0	-3.03	1917.01
3	2	96	5	4	6	2	3	1	0	1	6	6	0	0	0	0	-3.03	2093.03
3	2	97	6	3	2	5	4	1	0	5	4	4	0	0	0	0	-3.03	2477.06
3	2	98	6	3	2	5	4	1	0	2	3	3	0	0	1	0.5	-2.53	2477.06
3	2	99	1	3	2	6	4	5	0	4	5	5	0	0	0	0	-2.53	6252.92
3	2	100	1	2	4	6	3	5	0	6	4	4	0	0	0	0	-2.53	1325.07
4	2	1	4	1	5	2	6	3	0	2	4	5	1	0	0	0	0	2640.35
4	2	2	5	2	3	1	6	4	0	5	1	2	1	1	0	0	0	18154.5
4	2	3	5	3	1	6	4	2	0	3	2	2	0	1	0	0	0	5648.7
4	2	4	2	5	4	1	6	3	0	4	3	3	0	0	0	0	0	1582.4
4	2	5	2	5	4	1	6	3	0	1	4	4	0	0	1	0.01	0.01	3881.62
4	2	6	5	3	6	2	4	1	0	5	1	1	0	0	0	0	0.01	8451.53
4	2	7	1	4	6	5	2	3	0	6	3	3	0	0	0	0	0.01	1450.31
4	2	8	4	2	3	5	6	1	0	2	2	2	0	0	0	0	0.01	1411.4
4	2	9	3	4	1	6	2	5	0	5	6	6	0	0	0	0	0.01	2720.88
4	2	10	3	4	1	6	2	5	0	3	1	5	1	0	1	0.01	0	1966.43
4	2	11	5	2	1	4	6	3	0	4	4	4	0	1	0	0	0	1579.66
4	2	12	2	3	1	6	5	4	0	1	3	3	0	0	0	0	0	1724.59
4	2	13	6	2	5	1	3	4	0	5	3	3	0	0	0	0	0	1405.46
4	2	14	6	2	5	1	3	4	0	6	1	4	1	0	1	0.01	-0.01	2541.26
4	2	15	4	2	6	5	1	3	0	2	2	2	0	1	0	0	-0.01	2700.94
4	2	16	2	4	5	3	6	1	0	5	3	3	0	0	0	0	-0.01	1334.97
4	2	17	1	6	2	5	3	4	0	3	5	5	0	0	0	0	-0.01	2151.16
4	2	18	6	1	2	4	5	3	0	4	4	4	0	0	0	0	-0.01	1184.11
4	2	19	6	1	2	4	5	3	0	1	2	3	1	0	1	0.01	-0.02	2250.96
4	2	20	6	4	5	2	1	3	0	5	3	3	0	1	0	0	-0.02	1551
4	2	21	6	2	1	5	3	4	0	6	1	1	0	0	0	0	-0.02	2470.08
4	2	22	1	5	4	2	3	6	0	2	4	4	0	0	0	0	-0.02	3589.33
4	2	23	1	5	4	2	3	6	0	5	2	6	1	0	1	0.01	-0.03	4621.01
4	2	24	1	2	3	6	5	4	0	3	3	2	1	1	0	0	-0.03	3599.22
4	2	25	1	6	2	5	4	3	0	4	5	5	0	1	0	0	-0.03	1388.64
4	2	26	1	6	2	5	4	3	0	1	1	2	1	0	1	0.01	-0.04	4390.53
4	2	27	1	3	2	4	6	5	0	5	6	6	0	1	0	0	-0.04	2336.24
4	2	28	3	4	5	6	1	2	0	6	4	4	0	0	0	0	-0.04	1918.32
4	2	29	5	2	4	1	6	3	0	2	2	2	0	0	0	0	-0.04	1488.21
4	2	30	5	2	4	1	6	3	0	5	1	5	1	0	1	0.01	-0.05	3699.41
4	2	31	2	6	3	4	1	5	0	3	3	3	0	1	0	0	-0.05	2416.13
4	2	32	5	3	6	2	1	4	0	4	6	6	0	0	0	0	-0.05	1326.39
4	2	33	3	2	5	1	6	4	0	1	4	4	0	0	0	0	-0.05	1639.48
4	2	34	4	6	1	3	5	2	0	5	5	5	0	0	0	0	-0.05	1411.29
4	2	35	3	4	6	1	5	2	0	6	3	3	0	0	0	0	-0.05	1485.71
4	2	36	2	6	3	5	1	4	0	2	1	1	0	0	0	0	-0.05	2106.29
4	2	37	1	6	3	4	2	5	0	5	6	6	0	0	0	0	-0.05	1471.58
4	2	38	2	6	4	5	3	1	0	3	5	5	0	0	0	0	-0.05	1112.8
4	2	39	2	6	4	5	3	1	0	4	3	4	1	0	1	0.01	-0.06	1895.49
4	2	40	6	2	4	3	1	5	0	1	5	5	0	1	0	0	-0.06	2541.25
4	2	41	4	1	3	6	2	5	0	5	6	6	0	0	0	0	-0.06	976.075
4	2	42	6	3	2	5	1	4	0	6	1	1	0	0	0	0	-0.06	1448.24
4	2	43	6	3	2	5	1	4	0	2	3	6	1	0	1	0.01	-0.07	4527.47
4	2	44	5	4	6	1	3	2	0	5	1	1	0	1	0	0	-0.07	2984.67
4	2	45	5	4	6	2	1	3	0	3	6	6	0	0	0	0	-0.07	1312.63
4	2	46	2	4	3	5	6	1	0	4	2	2	0	0	0	0	-0.07	1456.93
4	2	47	6	4	5	2	1	3	0	1	5	5	0	0	0	0	-0.07	4712.64
4	2	48	6	4	5	2	1	3	0	5	3	1	1	0	1	0.01	-0.08	4266.03
4	2	49	6	3	1	4	2	5	0	6	1	1	0	1	0	0	-0.08	1204.04
4	2	50	6	2	5	3	4	1	0	2	2	2	0	0	0	0	-0.08	1372.8
4	2	51	6	3	2	5	4	1	0	5	4	4	0	0	0	0	-0.08	1735.75
4	2	52	1	6	3	5	2	4	0	3	3	3	0	0	0	0	-0.08	2012
4	2	53	1	6	3	5	2	4	0	4	6	6	0	0	1	0.01	-0.07	2959.23
4	2	54	3	1	2	5	6	4	0	1	2	2	0	0	0	0	-0.07	1258.15
4	2	55	4	2	3	5	6	1	0	5	4	4	0	0	0	0	-0.07	2806.24
4	2	56	5	2	6	3	1	4	0	6	3	3	0	0	0	0	-0.07	2116.83
4	2	57	2	4	6	1	3	5	0	2	1	1	0	0	0	0	-0.07	1712.87
4	2	58	1	3	6	2	5	4	0	5	5	5	0	0	0	0	-0.07	1719.24
4	2	59	6	4	1	3	5	2	0	3	4	6	1	0	0	0	-0.07	2242.83
4	2	60	1	4	2	6	3	5	0	4	2	2	0	1	1	0.01	-0.06	3438.03
4	2	61	1	5	3	4	6	2	0	1	1	1	0	0	0	0	-0.06	1361.24
4	2	62	6	1	3	4	2	5	0	5	6	6	0	0	0	0	-0.06	1514.41
4	2	63	5	2	4	1	3	6	0	6	6	6	0	0	0	0	-0.06	1767.35
4	2	64	5	2	4	1	3	6	0	2	2	2	0	0	1	0.01	-0.05	3724.86
4	2	65	5	1	6	2	4	3	0	5	1	1	0	0	0	0	-0.05	1610.55
4	2	66	1	4	2	5	6	3	0	3	6	6	0	0	0	0	-0.05	1748.12
4	2	67	3	6	2	5	4	1	0	4	5	5	0	0	0	0	-0.05	1810.16
4	2	68	6	5	4	3	2	1	0	1	6	6	0	0	0	0	-0.05	1559.78
4	2	69	6	5	4	3	2	1	0	5	2	1	1	0	1	0.01	-0.06	2624
4	2	70	6	1	5	3	2	4	0	6	1	1	0	1	0	0	-0.06	2353.6
4	2	71	5	3	4	2	6	1	0	2	4	4	0	0	0	0	-0.06	3621.99
4	2	72	2	4	6	1	5	3	0	5	5	5	0	0	0	0	-0.06	1013.36
4	2	73	5	3	4	2	1	6	0	3	2	2	0	0	0	0	-0.06	1408.55
4	2	74	5	3	4	2	1	6	0	4	3	6	1	0	1	0.01	-0.07	5395.09
4	2	75	5	2	3	1	4	6	0	1	4	4	0	1	0	0	-0.07	1841.43
4	2	76	6	5	3	4	2	1	0	5	2	2	0	0	0	0	-0.07	2284.97
4	2	77	6	5	3	4	2	1	0	6	1	1	0	0	1	0.01	-0.06	1824.26
4	2	78	4	1	2	3	5	6	0	2	3	3	0	0	0	0	-0.06	2512.88
4	2	79	1	4	6	2	3	5	0	5	6	6	0	0	0	0	-0.06	1813.24
4	2	80	4	1	5	2	3	6	0	3	5	5	0	0	0	0	-0.06	1377.93
4	2	81	4	1	2	5	3	6	0	4	1	1	0	0	0	0	-0.06	1343.45
4	2	82	4	1	2	5	3	6	0	1	2	6	1	0	1	0.01	-0.07	6132.62
4	2	83	5	4	6	3	2	1	0	5	1	1	0	1	0	0	-0.07	1784.58
4	2	84	4	1	5	2	6	3	0	6	5	5	0	0	0	0	-0.07	2479.06
4	2	85	4	1	2	6	3	5	0	2	3	3	0	0	0	0	-0.07	1921.39
4	2	86	6	2	4	3	1	5	0	5	6	6	0	0	0	0	-0.07	1904.01
4	2	87	6	2	4	3	1	5	0	3	4	2	1	0	1	0.01	-0.08	4296.61
4	2	88	2	3	6	5	4	1	0	4	5	5	0	1	0	0	-0.08	1508.12
4	2	89	4	1	3	2	6	5	0	1	2	1	1	0	0	0	-0.08	3196.07
4	2	90	5	1	2	4	3	6	0	5	1	1	0	1	0	0	-0.08	1067.93
4	2	91	2	4	3	5	1	6	0	6	6	6	0	0	0	0	-0.08	2061.02
4	2	92	2	4	1	6	5	3	0	2	1	1	0	0	0	0	-0.08	1619.44
4	2	93	2	4	1	6	5	3	0	5	5	4	1	0	1	0.01	-0.09	2800.84
4	2	94	1	3	4	5	6	2	0	3	2	2	0	1	0	0	-0.09	1087.13
4	2	95	5	2	1	4	3	6	0	4	4	4	0	0	0	0	-0.09	2230.86
4	2	96	6	2	1	4	3	5	0	1	3	3	0	0	0	0	-0.09	2114
4	2	97	4	5	1	2	3	6	0	5	2	2	0	0	0	0	-0.09	1081.59
4	2	98	4	5	1	2	3	6	0	6	6	4	1	0	1	0.01	-0.1	3528.8
4	2	99	1	2	6	4	5	3	0	2	2	2	0	1	0	0	-0.1	2208.12
4	2	100	6	1	2	3	5	4	0	5	5	5	0	0	0	0	-0.1	2510.06
5	1	1	4	1	5	2	6	3	2	0	4	4	0	0	0	0	0	1444.91
5	1	2	5	2	3	1	6	4	5	0	1	1	0	0	0	0	0	1097.12
5	1	3	5	3	1	6	4	2	3	0	2	2	0	0	0	0	0	1174.8
5	1	4	2	5	4	1	6	3	4	0	3	3	0	0	0	0	0	1137.57
5	1	5	2	5	4	1	6	3	1	0	4	5	1	0	1	0.01	-0.01	4776.81
5	1	6	5	3	6	2	4	1	5	0	1	1	0	1	0	0	-0.01	1049.94
5	1	7	1	4	6	5	2	3	6	0	3	3	0	0	0	0	-0.01	1180.77
5	1	8	4	2	3	5	6	1	2	0	2	2	0	0	0	0	-0.01	889.133
5	1	9	3	4	1	6	2	5	5	0	6	6	0	0	0	0	-0.01	921.363
5	1	10	3	4	1	6	2	5	3	0	1	1	0	0	1	0.5	0.49	5408.35
5	1	11	5	2	1	4	6	3	4	0	4	4	0	0	0	0	0.49	1282.14
5	1	12	2	3	1	6	5	4	1	0	3	3	0	0	0	0	0.49	1100.46
5	1	13	6	2	5	1	3	4	5	0	3	3	0	0	0	0	0.49	1052.01
5	1	14	6	2	5	1	3	4	6	0	1	2	1	0	1	0.01	0.48	5493.85
5	1	15	4	2	6	5	1	3	2	0	2	2	0	1	0	0	0.48	998.083
5	1	16	2	4	5	3	6	1	5	0	3	3	0	0	0	0	0.48	852.917
5	1	17	1	6	2	5	3	4	3	0	5	5	0	0	0	0	0.48	1455.91
5	1	18	6	1	2	4	5	3	4	0	4	4	0	0	0	0	0.48	843.817
5	1	19	6	1	2	4	5	3	1	0	2	1	1	0	1	0.01	0.47	4623.06
5	1	20	6	4	5	2	1	3	5	0	3	3	0	1	0	0	0.47	878.649
5	1	21	6	2	1	5	3	4	6	0	1	1	0	0	0	0	0.47	966.583
5	1	22	1	5	4	2	3	6	2	0	4	4	0	0	0	0	0.47	1089.93
5	1	23	1	5	4	2	3	6	5	0	2	5	1	0	1	0.5	-0.03	3664
5	1	24	1	2	3	6	5	4	3	0	3	3	0	1	0	0	-0.03	886.815
5	1	25	1	6	2	5	4	3	4	0	5	5	0	0	0	0	-0.03	1106.05
5	1	26	1	6	2	5	4	3	1	0	1	4	1	0	1	0.01	-0.04	5974.31
5	1	27	1	3	2	4	6	5	5	0	6	6	0	1	0	0	-0.04	892.626
5	1	28	3	4	5	6	1	2	6	0	4	4	0	0	0	0	-0.04	881.45
5	1	29	5	2	4	1	6	3	2	0	2	2	0	0	0	0	-0.04	1129.68
5	1	30	5	2	4	1	6	3	5	0	1	3	1	0	1	0.01	-0.05	3565.16
5	1	31	2	6	3	4	1	5	3	0	3	3	0	1	0	0	-0.05	906.784
5	1	32	5	3	6	2	1	4	4	0	6	6	0	0	0	0	-0.05	986.707
5	1	33	3	2	5	1	6	4	1	0	4	4	0	0	0	0	-0.05	790.147
5	1	34	4	6	1	3	5	2	5	0	5	5	0	0	0	0	-0.05	1006.77
5	1	35	3	4	6	1	5	2	6	0	3	3	0	0	0	0	-0.05	1194.2
5	1	36	2	6	3	5	1	4	2	0	1	5	1	0	0	0	-0.05	1396.07
5	1	37	1	6	3	4	2	5	5	0	6	6	0	1	0	0	-0.05	1649.24
5	1	38	2	6	4	5	3	1	3	0	5	5	0	0	0	0	-0.05	1288.26
5	1	39	2	6	4	5	3	1	4	0	3	2	1	0	1	0.5	-0.55	3328.31
5	1	40	6	2	4	3	1	5	1	0	5	5	0	1	0	0	-0.55	869.881
5	1	41	4	1	3	6	2	5	5	0	6	6	0	0	0	0	-0.55	806.921
5	1	42	6	3	2	5	1	4	6	0	1	1	0	0	0	0	-0.55	838.475
5	1	43	6	3	2	5	1	4	2	0	3	3	0	0	1	0.01	-0.54	3823.99
5	1	44	5	4	6	1	3	2	5	0	1	1	0	0	0	0	-0.54	1060.74
5	1	45	5	4	6	2	1	3	3	0	6	6	0	0	0	0	-0.54	853.653
5	1	46	2	4	3	5	6	1	4	0	2	2	0	0	0	0	-0.54	958.268
5	1	47	6	4	5	2	1	3	1	0	5	5	0	0	0	0	-0.54	944.276
5	1	48	6	4	5	2	1	3	5	0	3	3	0	0	1	0.5	-0.04	2258.24
5	1	49	6	3	1	4	2	5	6	0	1	1	0	0	0	0	-0.04	846.976
5	1	50	6	2	5	3	4	1	2	0	2	2	0	0	0	0	-0.04	835.972
5	1	51	6	3	2	5	4	1	5	0	4	4	0	0	0	0	-0.04	2215.72
5	1	52	1	6	3	5	2	4	3	0	3	3	0	0	0	0	-0.04	1481.6
5	1	53	1	6	3	5	2	4	4	0	6	2	1	0	1	0.01	-0.05	2489.2
5	1	54	3	1	2	5	6	4	1	0	2	2	0	1	0	0	-0.05	747.693
5	1	55	4	2	3	5	6	1	5	0	4	4	0	0	0	0	-0.05	1166.41
5	1	56	5	2	6	3	1	4	6	0	3	3	0	0	0	0	-0.05	1171.7
5	1	57	2	4	6	1	3	5	2	0	1	1	0	0	0	0	-0.05	858.539
5	1	58	1	3	6	2	5	4	5	0	5	5	0	0	0	0	-0.05	810.663
5	1	59	6	4	1	3	5	2	3	0	4	4	0	0	0	0	-0.05	755.957
5	1	60	1	4	2	6	3	5	4	0	2	2	0	0	1	0.01	-0.04	4210.97
5	1	61	1	5	3	4	6	2	1	0	1	1	0	0	0	0	-0.04	804.209
5	1	62	6	1	3	4	2	5	5	0	6	6	0	0	0	0	-0.04	773.387
5	1	63	5	2	4	1	3	6	6	0	6	6	0	0	0	0	-0.04	1206.13
5	1	64	5	2	4	1	3	6	2	0	2	5	1	0	1	0.01	-0.05	6040.26
5	1	65	5	1	6	2	4	3	5	0	1	1	0	1	0	0	-0.05	747.382
5	1	66	1	4	2	5	6	3	3	0	6	6	0	0	0	0	-0.05	810.7
5	1	67	3	6	2	5	4	1	4	0	5	5	0	0	0	0	-0.05	1294.96
5	1	68	6	5	4	3	2	1	1	0	6	6	0	0	0	0	-0.05	1131.68
5	1	69	6	5	4	3	2	1	5	0	2	4	1	0	1	0.01	-0.06	3584.47
5	1	70	6	1	5	3	2	4	6	0	1	1	0	1	0	0	-0.06	812.194
5	1	71	5	3	4	2	6	1	2	0	4	4	0	0	0	0	-0.06	944.249
5	1	72	2	4	6	1	5	3	5	0	5	5	0	0	0	0	-0.06	835.85
5	1	73	5	3	4	2	1	6	3	0	2	6	1	0	0	0	-0.06	1885.87
5	1	74	5	3	4	2	1	6	4	0	3	1	1	1	1	0.01	-0.07	6833.98
5	1	75	5	2	3	1	4	6	1	0	4	4	0	1	0	0	-0.07	804.478
5	1	76	6	5	3	4	2	1	5	0	2	2	0	0	0	0	-0.07	841.469
5	1	77	6	5	3	4	2	1	6	0	1	5	1	0	1	0.01	-0.08	5854.16
5	1	78	4	1	2	3	5	6	2	0	3	3	0	1	0	0	-0.08	1126.31
5	1	79	1	4	6	2	3	5	5	0	6	6	0	0	0	0	-0.08	1049.72
5	1	80	4	1	5	2	3	6	3	0	5	5	0	0	0	0	-0.08	989.601
5	1	81	4	1	2	5	3	6	4	0	1	1	0	0	0	0	-0.08	1487.38
5	1	82	4	1	2	5	3	6	1	0	2	2	0	0	1	0.01	-0.07	2071.61
5	1	83	5	4	6	3	2	1	5	0	1	1	0	0	0	0	-0.07	761.515
5	1	84	4	1	5	2	6	3	6	0	5	5	0	0	0	0	-0.07	807.485
5	1	85	4	1	2	6	3	5	2	0	3	3	0	0	0	0	-0.07	1083.59
5	1	86	6	2	4	3	1	5	5	0	6	6	0	0	0	0	-0.07	853.386
5	1	87	6	2	4	3	1	5	3	0	4	2	1	0	1	0.01	-0.08	6576.48
5	1	88	2	3	6	5	4	1	4	0	5	5	0	1	0	0	-0.08	664.668
5	1	89	4	1	3	2	6	5	1	0	2	2	0	0	0	0	-0.08	969.526
5	1	90	5	1	2	4	3	6	5	0	1	1	0	0	0	0	-0.08	1060.82
5	1	91	2	4	3	5	1	6	6	0	6	6	0	0	0	0	-0.08	801.812
5	1	92	2	4	1	6	5	3	2	0	1	1	0	0	0	0	-0.08	796.13
5	1	93	2	4	1	6	5	3	5	0	5	4	1	0	1	0.01	-0.09	2185.1
5	1	94	1	3	4	5	6	2	3	0	2	2	0	1	0	0	-0.09	761.289
5	1	95	5	2	1	4	3	6	4	0	4	4	0	0	0	0	-0.09	1430.17
5	1	96	6	2	1	4	3	5	1	0	3	3	0	0	0	0	-0.09	1361.93
5	1	97	4	5	1	2	3	6	5	0	2	2	0	0	0	0	-0.09	724.923
5	1	98	4	5	1	2	3	6	6	0	6	1	1	0	1	0.01	-0.1	2702.97
5	1	99	1	2	6	4	5	3	2	0	2	2	0	1	0	0	-0.1	1985.52
5	1	100	6	1	2	3	5	4	5	0	5	5	0	0	0	0	-0.1	1288.21
6	1	1	2	5	3	1	4	6	5	0	2	2	0	0	0	0	0	895.563
6	1	2	4	1	5	3	6	2	2	0	6	6	0	0	0	0	0	783.502
6	1	3	4	3	2	5	1	6	4	0	1	1	0	0	0	0	0	863.593
6	1	4	5	1	4	3	6	2	6	0	5	5	0	0	0	0	0	2495.59
6	1	5	5	1	4	3	6	2	3	0	4	4	0	0	1	0.01	0.01	2271.43
6	1	6	6	4	3	2	5	1	1	0	6	6	0	0	0	0	0.01	3263.37
6	1	7	3	6	5	2	4	1	5	0	3	3	0	0	0	0	0.01	799.629
6	1	8	6	1	5	2	3	4	2	0	4	4	0	0	0	0	0.01	1807.5
6	1	9	3	1	2	6	4	5	4	0	5	5	0	0	0	0	0.01	1551.56
6	1	10	3	1	2	6	4	5	6	0	4	6	1	0	1	0.01	0	1903.61
6	1	11	6	1	3	4	2	5	3	0	3	3	0	1	0	0	0	1455.6
6	1	12	1	2	3	6	4	5	1	0	1	1	0	0	0	0	0	1631.58
6	1	13	6	1	5	3	4	2	5	0	3	6	1	0	0	0	0	1087.59
6	1	14	6	1	5	3	4	2	2	0	6	1	1	1	1	0.01	-0.01	6367.46
6	1	15	6	3	4	1	5	2	4	0	3	3	0	1	0	0	-0.01	1775.52
6	1	16	4	6	1	2	3	5	6	0	2	2	0	0	0	0	-0.01	1471.59
6	1	17	1	5	4	2	3	6	3	0	5	6	1	0	0	0	-0.01	2047.63
6	1	18	5	4	2	1	6	3	1	0	4	4	0	1	0	0	-0.01	1295.55
6	1	19	5	4	2	1	6	3	5	0	1	6	1	0	1	0.01	-0.02	1679.5
6	1	20	4	2	5	6	3	1	2	0	2	2	0	1	0	0	-0.02	783.689
6	1	21	5	3	1	4	2	6	4	0	4	4	0	0	0	0	-0.02	991.63
6	1	22	2	6	1	5	4	3	6	0	2	2	0	0	0	0	-0.02	1295.59
6	1	23	2	6	1	5	4	3	3	0	6	6	0	0	1	0.01	-0.01	6575.32
6	1	24	6	4	1	3	2	5	1	0	3	3	0	0	0	0	-0.01	2159.55
6	1	25	3	1	4	2	6	5	5	0	6	6	0	0	0	0	-0.01	1455.47
6	1	26	3	1	4	2	6	5	2	0	4	4	0	0	1	0.01	0	5071.4
6	1	27	1	2	3	6	4	5	4	0	5	5	0	0	0	0	0	2543.56
6	1	28	6	2	1	4	3	5	6	0	1	1	0	0	0	0	0	2575.48
6	1	29	6	5	1	3	2	4	3	0	4	4	0	0	0	0	0	1999.59
6	1	30	6	5	1	3	2	4	1	0	3	3	0	0	1	0.01	0.01	463.587
6	1	31	4	3	2	1	6	5	5	0	6	6	0	0	0	0	0.01	863.58
6	1	32	3	6	5	2	4	1	2	0	4	4	0	0	0	0	0.01	799.609
6	1	33	1	3	5	6	4	2	4	0	5	5	0	0	0	0	0.01	1807.54
6	1	34	1	6	2	3	4	5	6	0	2	2	0	0	0	0	0.01	1615.57
6	1	35	5	4	3	2	1	6	3	0	3	3	0	0	0	0	0.01	1455.51
6	1	36	2	5	6	1	3	4	1	0	4	4	0	0	0	0	0.01	623.668
6	1	37	5	4	2	6	3	1	5	0	1	1	0	0	0	0	0.01	703.622
6	1	38	1	3	2	5	6	4	2	0	3	3	0	0	0	0	0.01	703.618
6	1	39	1	3	2	5	6	4	4	0	6	1	1	0	1	0.01	0	2479.53
6	1	40	5	4	2	1	6	3	6	0	5	5	0	1	0	0	0	3391.54
6	1	41	5	6	4	3	1	2	3	0	4	4	0	0	0	0	0	2607.48
6	1	42	4	5	1	2	3	6	1	0	3	2	1	0	0	0	0	2111.54
6	1	43	4	5	1	2	3	6	5	0	2	5	1	1	1	0.01	-0.01	1295.59
6	1	44	6	5	3	4	2	1	2	0	5	5	0	1	0	0	-0.01	1263.58
6	1	45	6	3	4	2	1	5	4	0	3	3	0	0	0	0	-0.01	1359.56
6	1	46	4	5	1	3	2	6	6	0	6	6	0	0	0	0	-0.01	3007.5
6	1	47	6	2	3	1	4	5	3	0	3	6	1	0	0	0	-0.01	4687.5
6	1	48	6	2	3	1	4	5	1	0	4	5	1	1	1	0.01	-0.02	2095.52
6	1	49	2	5	1	4	3	6	5	0	2	2	0	1	0	0	-0.02	3791.55
6	1	50	6	1	2	4	5	3	2	0	3	3	0	0	0	0	-0.02	1455.58
6	1	51	5	3	1	6	2	4	4	0	6	6	0	0	0	0	-0.02	3135.35
6	1	52	1	6	2	5	3	4	6	0	2	2	0	0	0	0	-0.02	2303.6
6	1	53	1	6	2	5	3	4	3	0	5	1	1	0	1	0.01	-0.03	719.576
6	1	54	6	4	1	5	3	2	1	0	3	3	0	1	0	0	-0.03	3679.5
6	1	55	4	2	1	3	6	5	5	0	6	6	0	0	0	0	-0.03	1711.58
6	1	56	6	4	5	2	1	3	2	0	4	4	0	0	0	0	-0.03	2143.57
6	1	57	4	1	3	6	2	5	4	0	1	1	0	0	0	0	-0.03	1087.63
6	1	58	2	5	6	4	3	1	6	0	3	3	0	0	0	0	-0.03	1631.57
6	1	59	6	2	4	5	1	3	3	0	6	6	0	0	0	0	-0.03	2655.48
6	1	60	6	2	4	5	1	3	1	0	5	4	1	0	1	0.01	-0.04	943.493
6	1	61	5	4	3	6	1	2	5	0	1	1	0	1	0	0	-0.04	1055.61
6	1	62	4	5	2	1	3	6	2	0	3	3	0	0	0	0	-0.04	1039.61
6	1	63	4	3	5	2	6	1	4	0	1	1	0	0	0	0	-0.04	1807.61
6	1	64	4	3	5	2	6	1	6	0	5	6	1	0	1	0.01	-0.05	3775.46
6	1	65	5	2	6	1	4	3	3	0	6	6	0	1	0	0	-0.05	2191.63
6	1	66	1	2	5	4	3	6	1	0	1	1	0	0	0	0	-0.05	1503.41
6	1	67	6	5	4	1	3	2	5	0	2	2	0	0	0	0	-0.05	1183.59
6	1	68	2	1	5	4	6	3	2	0	1	1	0	0	0	0	-0.05	1567.58
6	1	69	2	1	5	4	6	3	4	0	4	5	1	0	1	0.01	-0.06	735.634
6	1	70	2	4	3	5	6	1	6	0	5	5	0	1	0	0	-0.06	5119.47
6	1	71	1	3	5	2	6	4	3	0	2	2	0	0	0	0	-0.06	927.618
6	1	72	3	6	4	5	2	1	1	0	6	6	0	0	0	0	-0.06	1071.57
6	1	73	4	6	1	5	2	3	5	0	4	4	0	0	0	0	-0.06	1727.61
6	1	74	4	6	1	5	2	3	2	0	5	3	1	0	1	0.01	-0.07	767.566
6	1	75	1	4	2	6	5	3	4	0	2	2	0	1	0	0	-0.07	1855.57
6	1	76	4	5	1	3	2	6	6	0	6	6	0	0	0	0	-0.07	3359.56
6	1	77	4	5	1	3	2	6	3	0	4	5	1	0	1	0.01	-0.08	3983.48
6	1	78	3	4	5	2	6	1	1	0	6	6	0	1	0	0	-0.08	1055.6
6	1	79	3	2	4	1	5	6	5	0	5	5	0	0	0	0	-0.08	2815.43
6	1	80	1	5	2	6	4	3	2	0	3	3	0	0	0	0	-0.08	1039.59
6	1	81	2	5	1	3	4	6	4	0	5	5	0	0	0	0	-0.08	2927.56
6	1	82	2	5	1	3	4	6	6	0	6	4	1	0	1	0.01	-0.09	879.629
6	1	83	6	3	4	1	5	2	3	0	2	2	0	1	0	0	-0.09	3295.53
6	1	84	1	5	2	6	4	3	1	0	1	1	0	0	0	0	-0.09	1823.5
6	1	85	5	1	3	6	2	4	5	0	1	1	0	0	0	0	-0.09	2479.47
6	1	86	1	4	6	5	2	3	2	0	5	2	1	0	0	0	-0.09	1791.5
6	1	87	1	4	6	5	2	3	4	0	2	4	1	1	1	0.01	-0.1	543.649
6	1	88	5	2	3	6	1	4	6	0	4	4	0	1	0	0	-0.1	1967.58
6	1	89	3	5	6	4	1	2	3	0	1	1	0	0	0	0	-0.1	1519.51
6	1	90	5	4	3	2	1	6	1	0	5	5	0	0	0	0	-0.1	1375.62
6	1	91	6	1	2	3	4	5	5	0	6	6	0	0	0	0	-0.1	2703.47
6	1	92	2	1	6	4	5	3	2	0	1	1	0	0	0	0	-0.1	2111.5
6	1	93	2	1	6	4	5	3	4	0	4	6	1	0	1	0.5	-0.6	447.609
6	1	94	4	1	3	2	6	5	6	0	5	5	0	1	0	0	-0.6	2399.59
6	1	95	3	4	2	6	1	5	3	0	1	1	0	0	0	0	-0.6	767.508
6	1	96	5	4	6	2	3	1	1	0	6	4	1	0	0	0	-0.6	1247.62
6	1	97	6	3	2	5	4	1	5	0	4	4	0	1	0	0	-0.6	1087.59
6	1	98	6	3	2	5	4	1	2	0	3	3	0	0	1	0.01	-0.59	863.621
6	1	99	1	3	2	6	4	5	4	0	5	5	0	0	0	0	-0.59	1039.6
6	1	100	1	2	4	6	3	5	6	0	4	4	0	0	0	0	-0.59	4479.5
7	2	1	2	5	3	1	4	6	0	5	2	2	0	0	0	0	0	903.732
7	2	2	4	1	5	3	6	2	0	2	6	6	0	0	0	0	0	1197.05
7	2	3	4	3	2	5	1	6	0	4	1	1	0	0	0	0	0	765.199
7	2	4	5	1	4	3	6	2	0	6	5	5	0	0	0	0	0	1229.19
7	2	5	5	1	4	3	6	2	0	3	4	3	1	0	1	0.01	-0.01	1661.15
7	2	6	6	4	3	2	5	1	0	1	6	6	0	1	0	0	-0.01	1005.16
7	2	7	3	6	5	2	4	1	0	5	3	3	0	0	0	0	-0.01	1437.18
7	2	8	6	1	5	2	3	4	0	2	4	4	0	0	0	0	-0.01	1693.23
7	2	9	3	1	2	6	4	5	0	4	5	5	0	0	0	0	-0.01	845.135
7	2	10	3	1	2	6	4	5	0	6	4	1	1	0	1	0.5	-0.51	2301.15
7	2	11	6	1	3	4	2	5	0	3	3	3	0	1	0	0	-0.51	1357.18
7	2	12	1	2	3	6	4	5	0	1	1	1	0	0	0	0	-0.51	1037.17
7	2	13	6	1	5	3	4	2	0	5	3	3	0	0	0	0	-0.51	701.124
7	2	14	6	1	5	3	4	2	0	2	6	5	1	0	1	0.5	-1.01	1629.18
7	2	15	6	3	4	1	5	2	0	4	3	3	0	1	0	0	-1.01	1069.21
7	2	16	4	6	1	2	3	5	0	6	2	2	0	0	0	0	-1.01	765.23
7	2	17	1	5	4	2	3	6	0	3	5	5	0	0	0	0	-1.01	1021.22
7	2	18	5	4	2	1	6	3	0	1	4	4	0	0	0	0	-1.01	877.202
7	2	19	5	4	2	1	6	3	0	5	1	6	1	0	1	0.01	-1.02	2109.16
7	2	20	4	2	5	6	3	1	0	2	2	2	0	1	0	0	-1.02	1357.21
7	2	21	5	3	1	4	2	6	0	4	4	4	0	0	0	0	-1.02	1549.19
7	2	22	2	6	1	5	4	3	0	6	2	2	0	0	0	0	-1.02	1101.21
7	2	23	2	6	1	5	4	3	0	3	6	5	1	0	1	0.5	-1.52	1757.15
7	2	24	6	4	1	3	2	5	0	1	3	3	0	1	0	0	-1.52	1133.21
7	2	25	3	1	4	2	6	5	0	5	6	6	0	0	0	0	-1.52	989.127
7	2	26	3	1	4	2	6	5	0	2	4	1	1	0	1	0.01	-1.53	1757.23
7	2	27	1	2	3	6	4	5	0	4	5	5	0	1	0	0	-1.53	685.21
7	2	28	6	2	1	4	3	5	0	6	1	2	1	0	0	0	-1.53	813.268
7	2	29	6	5	1	3	2	4	0	3	4	4	0	1	0	0	-1.53	1005.16
7	2	30	6	5	1	3	2	4	0	1	3	3	0	0	1	0.5	-1.03	1869.21
7	2	31	4	3	2	1	6	5	0	5	6	6	0	0	0	0	-1.03	1213.21
7	2	32	3	6	5	2	4	1	0	2	4	4	0	0	0	0	-1.03	1645.16
7	2	33	1	3	5	6	4	2	0	4	5	5	0	0	0	0	-1.03	1117.21
7	2	34	1	6	2	3	4	5	0	6	2	4	1	0	0	0	-1.03	621.286
7	2	35	5	4	3	2	1	6	0	3	3	1	1	1	0	0	-1.03	2205.16
7	2	36	2	5	6	1	3	4	0	1	4	4	0	1	0	0	-1.03	957.165
7	2	37	5	4	2	6	3	1	0	5	1	1	0	0	0	0	-1.03	957.195
7	2	38	1	3	2	5	6	4	0	2	3	1	1	0	0	0	-1.03	1069.2
7	2	39	1	3	2	5	6	4	0	4	6	6	0	1	1	0.5	-0.53	1789.17
7	2	40	5	4	2	1	6	3	0	6	5	5	0	0	0	0	-0.53	1069.23
7	2	41	5	6	4	3	1	2	0	3	4	4	0	0	0	0	-0.53	845.146
7	2	42	4	5	1	2	3	6	0	1	3	3	0	0	0	0	-0.53	877.234
7	2	43	4	5	1	2	3	6	0	5	2	1	1	0	1	0.5	-1.03	1997.17
7	2	44	6	5	3	4	2	1	0	2	5	1	1	1	0	0	-1.03	1565.23
7	2	45	6	3	4	2	1	5	0	4	3	3	0	1	0	0	-1.03	781.188
7	2	46	4	5	1	3	2	6	0	6	6	6	0	0	0	0	-1.03	877.207
7	2	47	6	2	3	1	4	5	0	3	3	3	0	0	0	0	-1.03	989.228
7	2	48	6	2	3	1	4	5	0	1	4	5	1	0	1	0.5	-1.53	2061.08
7	2	49	2	5	1	4	3	6	0	5	2	2	0	1	0	0	-1.53	2461.15
7	2	50	6	1	2	4	5	3	0	2	3	3	0	0	0	0	-1.53	1053.24
7	2	51	5	3	1	6	2	4	0	4	6	6	0	0	0	0	-1.53	941.169
7	2	52	1	6	2	5	3	4	0	6	2	2	0	0	0	0	-1.53	909.166
7	2	53	1	6	2	5	3	4	0	3	5	5	0	0	1	0.5	-1.03	2477.18
7	2	54	6	4	1	5	3	2	0	1	3	6	1	0	0	0	-1.03	1725.15
7	2	55	4	2	1	3	6	5	0	5	6	6	0	1	0	0	-1.03	861.207
7	2	56	6	4	5	2	1	3	0	2	4	4	0	0	0	0	-1.03	1789.18
7	2	57	4	1	3	6	2	5	0	4	1	1	0	0	0	0	-1.03	1325.2
7	2	58	2	5	6	4	3	1	0	6	3	3	0	0	0	0	-1.03	941.163
7	2	59	6	2	4	5	1	3	0	3	6	6	0	0	0	0	-1.03	797.222
7	2	60	6	2	4	5	1	3	0	1	5	4	1	0	1	0.5	-1.53	1501.18
7	2	61	5	4	3	6	1	2	0	5	1	1	0	1	0	0	-1.53	1085.22
7	2	62	4	5	2	1	3	6	0	2	3	3	0	0	0	0	-1.53	1117.22
7	2	63	4	3	5	2	6	1	0	4	1	1	0	0	0	0	-1.53	845.229
7	2	64	4	3	5	2	6	1	0	6	5	3	1	0	1	0.5	-2.03	1933.11
7	2	65	5	2	6	1	4	3	0	3	6	6	0	1	0	0	-2.03	893.238
7	2	66	1	2	5	4	3	6	0	1	1	1	0	0	0	0	-2.03	957.137
7	2	67	6	5	4	1	3	2	0	5	2	2	0	0	0	0	-2.03	861.198
7	2	68	2	1	5	4	6	3	0	2	1	1	0	0	0	0	-2.03	957.209
7	2	69	2	1	5	4	6	3	0	4	4	3	1	0	1	0.5	-2.53	2285.18
7	2	70	2	4	3	5	6	1	0	6	5	5	0	1	0	0	-2.53	749.232
7	2	71	1	3	5	2	6	4	0	3	2	2	0	0	0	0	-2.53	605.219
7	2	72	3	6	4	5	2	1	0	1	6	6	0	0	0	0	-2.53	925.219
7	2	73	4	6	1	5	2	3	0	5	4	4	0	0	0	0	-2.53	1165.15
7	2	74	4	6	1	5	2	3	0	2	5	1	1	0	1	0.5	-3.03	1357.25
7	2	75	1	4	2	6	5	3	0	4	2	2	0	1	0	0	-3.03	749.237
7	2	76	4	5	1	3	2	6	0	6	6	6	0	0	0	0	-3.03	1341.17
7	2	77	4	5	1	3	2	6	0	3	4	4	0	0	1	0.5	-2.53	1645.17
7	2	78	3	4	5	2	6	1	0	1	6	6	0	0	0	0	-2.53	813.205
7	2	79	3	2	4	1	5	6	0	5	5	5	0	0	0	0	-2.53	701.226
7	2	80	1	5	2	6	4	3	0	2	3	3	0	0	0	0	-2.53	1357.16
7	2	81	2	5	1	3	4	6	0	4	5	5	0	0	0	0	-2.53	1101.17
7	2	82	2	5	1	3	4	6	0	6	6	2	1	0	1	0.5	-3.03	1133.2
7	2	83	6	3	4	1	5	2	0	3	2	2	0	1	0	0	-3.03	749.228
7	2	84	1	5	2	6	4	3	0	1	1	1	0	0	0	0	-3.03	701.188
7	2	85	5	1	3	6	2	4	0	5	1	1	0	0	0	0	-3.03	861.221
7	2	86	1	4	6	5	2	3	0	2	5	5	0	0	0	0	-3.03	1709.18
7	2	87	1	4	6	5	2	3	0	4	2	2	0	0	1	0.5	-2.53	1613.25
7	2	88	5	2	3	6	1	4	0	6	4	4	0	0	0	0	-2.53	1037.23
7	2	89	3	5	6	4	1	2	0	3	1	4	1	0	0	0	-2.53	1229.21
7	2	90	5	4	3	2	1	6	0	1	5	5	0	1	0	0	-2.53	1981.15
7	2	91	6	1	2	3	4	5	0	5	6	6	0	0	0	0	-2.53	621.168
7	2	92	2	1	6	4	5	3	0	2	1	2	1	0	0	0	-2.53	941.225
7	2	93	2	1	6	4	5	3	0	4	4	2	1	1	1	0.5	-3.03	1453.2
7	2	94	4	1	3	2	6	5	0	6	5	5	0	1	0	0	-3.03	877.229
7	2	95	3	4	2	6	1	5	0	3	1	1	0	0	0	0	-3.03	717.153
7	2	96	5	4	6	2	3	1	0	1	6	6	0	0	0	0	-3.03	1181.21
7	2	97	6	3	2	5	4	1	0	5	4	4	0	0	0	0	-3.03	1021.16
7	2	98	6	3	2	5	4	1	0	2	3	4	1	0	1	0.5	-3.53	1453.2
7	2	99	1	3	2	6	4	5	0	4	5	5	0	1	0	0	-3.53	781.198
7	2	100	1	2	4	6	3	5	0	6	4	4	0	0	0	0	-3.53	701.222
8	2	1	4	1	5	2	6	3	0	2	4	4	0	0	0	0	0	1001.32
8	2	2	5	2	3	1	6	4	0	5	1	1	0	0	0	0	0	813.051
8	2	3	5	3	1	6	4	2	0	3	2	2	0	0	0	0	0	701.068
8	2	4	2	5	4	1	6	3	0	4	3	3	0	0	0	0	0	653.152
8	2	5	2	5	4	1	6	3	0	1	4	4	0	0	1	0.5	0.5	1868.99
8	2	6	5	3	6	2	4	1	0	5	1	1	0	0	0	0	0.5	925.084
8	2	7	1	4	6	5	2	3	0	6	3	3	0	0	0	0	0.5	877.103
8	2	8	4	2	3	5	6	1	0	2	2	2	0	0	0	0	0.5	1037.15
8	2	9	3	4	1	6	2	5	0	5	6	6	0	0	0	0	0.5	797.104
8	2	10	3	4	1	6	2	5	0	3	1	4	1	0	1	0.01	0.49	2989.05
8	2	11	5	2	1	4	6	3	0	4	4	4	0	1	0	0	0.49	733.068
8	2	12	2	3	1	6	5	4	0	1	3	3	0	0	0	0	0.49	909.148
8	2	13	6	2	5	1	3	4	0	5	3	3	0	0	0	0	0.49	957.111
8	2	14	6	2	5	1	3	4	0	6	1	4	1	0	1	0.01	0.48	5629
8	2	15	4	2	6	5	1	3	0	2	2	2	0	1	0	0	0.48	1117.09
8	2	16	2	4	5	3	6	1	0	5	3	3	0	0	0	0	0.48	765.088
8	2	17	1	6	2	5	3	4	0	3	5	5	0	0	0	0	0.48	909.103
8	2	18	6	1	2	4	5	3	0	4	4	4	0	0	0	0	0.48	845.078
8	2	19	6	1	2	4	5	3	0	1	2	1	1	0	1	0.01	0.47	4109.04
8	2	20	6	4	5	2	1	3	0	5	3	3	0	1	0	0	0.47	733.068
8	2	21	6	2	1	5	3	4	0	6	1	1	0	0	0	0	0.47	829.178
8	2	22	1	5	4	2	3	6	0	2	4	4	0	0	0	0	0.47	1069.05
8	2	23	1	5	4	2	3	6	0	5	2	6	1	0	1	0.5	-0.03	2701.05
8	2	24	1	2	3	6	5	4	0	3	3	3	0	1	0	0	-0.03	813.098
8	2	25	1	6	2	5	4	3	0	4	5	5	0	0	0	0	-0.03	796.992
8	2	26	1	6	2	5	4	3	0	1	1	4	1	0	1	0.01	-0.04	5869
8	2	27	1	3	2	4	6	5	0	5	6	6	0	1	0	0	-0.04	973.101
8	2	28	3	4	5	6	1	2	0	6	4	4	0	0	0	0	-0.04	845.056
8	2	29	5	2	4	1	6	3	0	2	2	2	0	0	0	0	-0.04	989.132
8	2	30	5	2	4	1	6	3	0	5	1	5	1	0	1	0.01	-0.05	10716.8
8	2	31	2	6	3	4	1	5	0	3	3	3	0	1	0	0	-0.05	717.11
8	2	32	5	3	6	2	1	4	0	4	6	6	0	0	0	0	-0.05	797.106
8	2	33	3	2	5	1	6	4	0	1	4	4	0	0	0	0	-0.05	765.133
8	2	34	4	6	1	3	5	2	0	5	5	5	0	0	0	0	-0.05	1005.09
8	2	35	3	4	6	1	5	2	0	6	3	3	0	0	0	0	-0.05	1677.09
8	2	36	2	6	3	5	1	4	0	2	1	1	0	0	0	0	-0.05	1021.07
8	2	37	1	6	3	4	2	5	0	5	6	6	0	0	0	0	-0.05	1405.08
8	2	38	2	6	4	5	3	1	0	3	5	5	0	0	0	0	-0.05	1405.09
8	2	39	2	6	4	5	3	1	0	4	3	4	1	0	1	0.01	-0.06	2461.08
8	2	40	6	2	4	3	1	5	0	1	5	5	0	1	0	0	-0.06	2237.09
8	2	41	4	1	3	6	2	5	0	5	6	6	0	0	0	0	-0.06	941.104
8	2	42	6	3	2	5	1	4	0	6	1	1	0	0	0	0	-0.06	1069.09
8	2	43	6	3	2	5	1	4	0	2	3	2	1	0	1	0.5	-0.56	2605.07
8	2	44	5	4	6	1	3	2	0	5	1	1	0	1	0	0	-0.56	1021.08
8	2	45	5	4	6	2	1	3	0	3	6	6	0	0	0	0	-0.56	893.091
8	2	46	2	4	3	5	6	1	0	4	2	2	0	0	0	0	-0.56	1069.13
8	2	47	6	4	5	2	1	3	0	1	5	5	0	0	0	0	-0.56	765.097
8	2	48	6	4	5	2	1	3	0	5	3	3	0	0	1	0.5	-0.06	1357.07
8	2	49	6	3	1	4	2	5	0	6	1	1	0	0	0	0	-0.06	749.155
8	2	50	6	2	5	3	4	1	0	2	2	2	0	0	0	0	-0.06	1133.1
8	2	51	6	3	2	5	4	1	0	5	4	4	0	0	0	0	-0.06	989.091
8	2	52	1	6	3	5	2	4	0	3	3	3	0	0	0	0	-0.06	1357.11
8	2	53	1	6	3	5	2	4	0	4	6	5	1	0	1	0.01	-0.07	3261.01
8	2	54	3	1	2	5	6	4	0	1	2	2	0	1	0	0	-0.07	1069.04
8	2	55	4	2	3	5	6	1	0	5	4	4	0	0	0	0	-0.07	749.113
8	2	56	5	2	6	3	1	4	0	6	3	3	0	0	0	0	-0.07	1725.13
8	2	57	2	4	6	1	3	5	0	2	1	4	1	0	0	0	-0.07	1565.02
8	2	58	1	3	6	2	5	4	0	5	5	5	0	1	0	0	-0.07	781.145
8	2	59	6	4	1	3	5	2	0	3	4	4	0	0	0	0	-0.07	797.144
8	2	60	1	4	2	6	3	5	0	4	2	4	1	0	1	0.01	-0.08	6012.96
8	2	61	1	5	3	4	6	2	0	1	1	1	0	1	0	0	-0.08	973.089
8	2	62	6	1	3	4	2	5	0	5	6	6	0	0	0	0	-0.08	941.061
8	2	63	5	2	4	1	3	6	0	6	6	6	0	0	0	0	-0.08	893.191
8	2	64	5	2	4	1	3	6	0	2	2	1	1	0	1	0.5	-0.58	1437.06
8	2	65	5	1	6	2	4	3	0	5	1	1	0	1	0	0	-0.58	1389.08
8	2	66	1	4	2	5	6	3	0	3	6	6	0	0	0	0	-0.58	877.095
8	2	67	3	6	2	5	4	1	0	4	5	5	0	0	0	0	-0.58	909.142
8	2	68	6	5	4	3	2	1	0	1	6	6	0	0	0	0	-0.58	1005.07
8	2	69	6	5	4	3	2	1	0	5	2	4	1	0	1	0.01	-0.59	5148.94
8	2	70	6	1	5	3	2	4	0	6	1	1	0	1	0	0	-0.59	781.105
8	2	71	5	3	4	2	6	1	0	2	4	4	0	0	0	0	-0.59	669.101
8	2	72	2	4	6	1	5	3	0	5	5	5	0	0	0	0	-0.59	781.123
8	2	73	5	3	4	2	1	6	0	3	2	2	0	0	0	0	-0.59	1117.06
8	2	74	5	3	4	2	1	6	0	4	3	6	1	0	1	0.01	-0.6	4877.05
8	2	75	5	2	3	1	4	6	0	1	4	4	0	1	0	0	-0.6	909.057
8	2	76	6	5	3	4	2	1	0	5	2	2	0	0	0	0	-0.6	1117.11
8	2	77	6	5	3	4	2	1	0	6	1	6	1	0	1	0.5	-1.1	3997.04
8	2	78	4	1	2	3	5	6	0	2	3	3	0	1	0	0	-1.1	909.078
8	2	79	1	4	6	2	3	5	0	5	6	6	0	0	0	0	-1.1	717.125
8	2	80	4	1	5	2	3	6	0	3	5	5	0	0	0	0	-1.1	1181.14
8	2	81	4	1	2	5	3	6	0	4	1	1	0	0	0	0	-1.1	1197.04
8	2	82	4	1	2	5	3	6	0	1	2	4	1	0	1	0.01	-1.11	6012.97
8	2	83	5	4	6	3	2	1	0	5	1	1	0	1	0	0	-1.11	877.13
8	2	84	4	1	5	2	6	3	0	6	5	5	0	0	0	0	-1.11	925.12
8	2	85	4	1	2	6	3	5	0	2	3	3	0	0	0	0	-1.11	893.13
8	2	86	6	2	4	3	1	5	0	5	6	6	0	0	0	0	-1.11	1629.07
8	2	87	6	2	4	3	1	5	0	3	4	4	0	0	1	0.01	-1.1	5052.98
8	2	88	2	3	6	5	4	1	0	4	5	5	0	0	0	0	-1.1	733.089
8	2	89	4	1	3	2	6	5	0	1	2	2	0	0	0	0	-1.1	1149.13
8	2	90	5	1	2	4	3	6	0	5	1	1	0	0	0	0	-1.1	781.084
8	2	91	2	4	3	5	1	6	0	6	6	6	0	0	0	0	-1.1	797.1
8	2	92	2	4	1	6	5	3	0	2	1	1	0	0	0	0	-1.1	1117.11
8	2	93	2	4	1	6	5	3	0	5	5	6	1	0	1	0.5	-1.6	1533.1
8	2	94	1	3	4	5	6	2	0	3	2	2	0	1	0	0	-1.6	957.101
8	2	95	5	2	1	4	3	6	0	4	4	4	0	0	0	0	-1.6	781.051
8	2	96	6	2	1	4	3	5	0	1	3	3	0	0	0	0	-1.6	941.086
8	2	97	4	5	1	2	3	6	0	5	2	2	0	0	0	0	-1.6	1133.16
8	2	98	4	5	1	2	3	6	0	6	6	4	1	0	1	0.5	-2.1	3165.02
8	2	99	1	2	6	4	5	3	0	2	2	2	0	1	0	0	-2.1	813.08
8	2	100	6	1	2	3	5	4	0	5	5	5	0	0	0	0	-2.1	1021.12
9	1	1	4	1	5	2	6	3	2	0	4	4	0	0	0	0	0	983.638
9	1	2	5	2	3	1	6	4	5	0	1	1	0	0	0	0	0	719.515
9	1	3	5	3	1	6	4	2	3	0	2	2	0	0	0	0	0	671.527
9	1	4	2	5	4	1	6	3	4	0	3	3	0	0	0	0	0	815.579
9	1	5	2	5	4	1	6	3	1	0	4	4	0	0	1	0.5	0.5	5295.34
9	1	6	5	3	6	2	4	1	5	0	1	1	0	0	0	0	0.5	847.593
9	1	7	1	4	6	5	2	3	6	0	3	3	0	0	0	0	0.5	1039.63
9	1	8	4	2	3	5	6	1	2	0	2	2	0	0	0	0	0.5	703.582
9	1	9	3	4	1	6	2	5	5	0	6	6	0	0	0	0	0.5	751.618
9	1	10	3	4	1	6	2	5	3	0	1	4	1	0	1	0.5	0	4079.47
9	1	11	5	2	1	4	6	3	4	0	4	5	1	1	0	0	0	687.57
9	1	12	2	3	1	6	5	4	1	0	3	3	0	1	0	0	0	1023.62
9	1	13	6	2	5	1	3	4	5	0	3	4	1	0	0	0	0	1263.62
9	1	14	6	2	5	1	3	4	6	0	1	3	1	1	1	0.5	-0.5	2143.53
9	1	15	4	2	6	5	1	3	2	0	2	2	0	1	0	0	-0.5	1055.62
9	1	16	2	4	5	3	6	1	5	0	3	3	0	0	0	0	-0.5	1055.58
9	1	17	1	6	2	5	3	4	3	0	5	5	0	0	0	0	-0.5	1535.58
9	1	18	6	1	2	4	5	3	4	0	4	4	0	0	0	0	-0.5	815.533
9	1	19	6	1	2	4	5	3	1	0	2	1	1	0	1	0.01	-0.51	7055.45
9	1	20	6	4	5	2	1	3	5	0	3	3	0	1	0	0	-0.51	847.634
9	1	21	6	2	1	5	3	4	6	0	1	1	0	0	0	0	-0.51	831.588
9	1	22	1	5	4	2	3	6	2	0	4	4	0	0	0	0	-0.51	847.555
9	1	23	1	5	4	2	3	6	5	0	2	6	1	0	1	0.5	-1.01	1455.57
9	1	24	1	2	3	6	5	4	3	0	3	3	0	1	0	0	-1.01	735.591
9	1	25	1	6	2	5	4	3	4	0	5	5	0	0	0	0	-1.01	1695.53
9	1	26	1	6	2	5	4	3	1	0	1	2	1	0	1	0.01	-1.02	10383.3
9	1	27	1	3	2	4	6	5	5	0	6	6	0	1	0	0	-1.02	719.626
9	1	28	3	4	5	6	1	2	6	0	4	4	0	0	0	0	-1.02	639.571
9	1	29	5	2	4	1	6	3	2	0	2	2	0	0	0	0	-1.02	1183.51
9	1	30	5	2	4	1	6	3	5	0	1	1	0	0	1	0.5	-0.52	2623.57
9	1	31	2	6	3	4	1	5	3	0	3	3	0	0	0	0	-0.52	767.601
9	1	32	5	3	6	2	1	4	4	0	6	6	0	0	0	0	-0.52	1167.57
9	1	33	3	2	5	1	6	4	1	0	4	4	0	0	0	0	-0.52	1647.6
9	1	34	4	6	1	3	5	2	5	0	5	5	0	0	0	0	-0.52	1439.54
9	1	35	3	4	6	1	5	2	6	0	3	3	0	0	0	0	-0.52	991.611
9	1	36	2	6	3	5	1	4	2	0	1	2	1	0	0	0	-0.52	1375.59
9	1	37	1	6	3	4	2	5	5	0	6	6	0	1	0	0	-0.52	1007.35
9	1	38	2	6	4	5	3	1	3	0	5	5	0	0	0	0	-0.52	815.572
9	1	39	2	6	4	5	3	1	4	0	3	4	1	0	1	0.01	-0.53	3199.51
9	1	40	6	2	4	3	1	5	1	0	5	5	0	1	0	0	-0.53	703.579
9	1	41	4	1	3	6	2	5	5	0	6	6	0	0	0	0	-0.53	1055.6
9	1	42	6	3	2	5	1	4	6	0	1	1	0	0	0	0	-0.53	2287.5
9	1	43	6	3	2	5	1	4	2	0	3	2	1	0	1	0.01	-0.54	10495.3
9	1	44	5	4	6	1	3	2	5	0	1	1	0	1	0	0	-0.54	687.586
9	1	45	5	4	6	2	1	3	3	0	6	6	0	0	0	0	-0.54	815.614
9	1	46	2	4	3	5	6	1	4	0	2	2	0	0	0	0	-0.54	1295.59
9	1	47	6	4	5	2	1	3	1	0	5	5	0	0	0	0	-0.54	1343.58
9	1	48	6	4	5	2	1	3	5	0	3	3	0	0	1	0.01	-0.53	2767.42
9	1	49	6	3	1	4	2	5	6	0	1	1	0	0	0	0	-0.53	959.654
9	1	50	6	2	5	3	4	1	2	0	2	2	0	0	0	0	-0.53	1087.61
9	1	51	6	3	2	5	4	1	5	0	4	4	0	0	0	0	-0.53	1487.61
9	1	52	1	6	3	5	2	4	3	0	3	3	0	0	0	0	-0.53	2255.52
9	1	53	1	6	3	5	2	4	4	0	6	5	1	0	1	0.01	-0.54	3103.54
9	1	54	3	1	2	5	6	4	1	0	2	2	0	1	0	0	-0.54	687.642
9	1	55	4	2	3	5	6	1	5	0	4	6	1	0	0	0	-0.54	1407.59
9	1	56	5	2	6	3	1	4	6	0	3	5	1	1	0	0	-0.54	1167.59
9	1	57	2	4	6	1	3	5	2	0	1	4	1	1	0	0	-0.54	2575.51
9	1	58	1	3	6	2	5	4	5	0	5	5	0	1	0	0	-0.54	1631.57
9	1	59	6	4	1	3	5	2	3	0	4	4	0	0	0	0	-0.54	1375.58
9	1	60	1	4	2	6	3	5	4	0	2	6	1	0	1	0.01	-0.55	4223.51
9	1	61	1	5	3	4	6	2	1	0	1	1	0	1	0	0	-0.55	943.579
9	1	62	6	1	3	4	2	5	5	0	6	6	0	0	0	0	-0.55	1167.57
9	1	63	5	2	4	1	3	6	6	0	6	6	0	0	0	0	-0.55	4015.49
9	1	64	5	2	4	1	3	6	2	0	2	1	1	0	1	0.5	-1.05	4031.51
9	1	65	5	1	6	2	4	3	5	0	1	1	0	1	0	0	-1.05	703.658
9	1	66	1	4	2	5	6	3	3	0	6	6	0	0	0	0	-1.05	991.585
9	1	67	3	6	2	5	4	1	4	0	5	5	0	0	0	0	-1.05	1199.58
9	1	68	6	5	4	3	2	1	1	0	6	6	0	0	0	0	-1.05	3407.52
9	1	69	6	5	4	3	2	1	5	0	2	2	0	0	1	0.01	-1.04	1215.56
9	1	70	6	1	5	3	2	4	6	0	1	1	0	0	0	0	-1.04	911.606
9	1	71	5	3	4	2	6	1	2	0	4	5	1	0	0	0	-1.04	3247.52
9	1	72	2	4	6	1	5	3	5	0	5	5	0	1	0	0	-1.04	1839.58
9	1	73	5	3	4	2	1	6	3	0	2	2	0	0	0	0	-1.04	2703.47
9	1	74	5	3	4	2	1	6	4	0	3	2	1	0	1	0.01	-1.05	3647.44
9	1	75	5	2	3	1	4	6	1	0	4	4	0	1	0	0	-1.05	1295.58
9	1	76	6	5	3	4	2	1	5	0	2	2	0	0	0	0	-1.05	2431.47
9	1	77	6	5	3	4	2	1	6	0	1	4	1	0	1	0.01	-1.06	4159.5
9	1	78	4	1	2	3	5	6	2	0	3	3	0	1	0	0	-1.06	1727.57
9	1	79	1	4	6	2	3	5	5	0	6	6	0	0	0	0	-1.06	3343.43
9	1	80	4	1	5	2	3	6	3	0	5	4	1	0	0	0	-1.06	2111.56
9	1	81	4	1	2	5	3	6	4	0	1	1	0	1	0	0	-1.06	1679.52
9	1	82	4	1	2	5	3	6	1	0	2	2	0	0	1	0.01	-1.05	2143.52
9	1	83	5	4	6	3	2	1	5	0	1	1	0	0	0	0	-1.05	767.56
9	1	84	4	1	5	2	6	3	6	0	5	5	0	0	0	0	-1.05	2271.56
9	1	85	4	1	2	6	3	5	2	0	3	3	0	0	0	0	-1.05	2543.56
9	1	86	6	2	4	3	1	5	5	0	6	2	1	0	0	0	-1.05	1359.62
9	1	87	6	2	4	3	1	5	3	0	4	1	1	1	1	0.01	-1.06	1695.49
9	1	88	2	3	6	5	4	1	4	0	5	5	0	1	0	0	-1.06	1615.58
9	1	89	4	1	3	2	6	5	1	0	2	2	0	0	0	0	-1.06	1359.61
9	1	90	5	1	2	4	3	6	5	0	1	1	0	0	0	0	-1.06	1503.57
9	1	91	2	4	3	5	1	6	6	0	6	6	0	0	0	0	-1.06	2911.52
9	1	92	2	4	1	6	5	3	2	0	1	1	0	0	0	0	-1.06	1487.56
9	1	93	2	4	1	6	5	3	5	0	5	6	1	0	1	0.01	-1.07	1679.59
9	1	94	1	3	4	5	6	2	3	0	2	2	0	1	0	0	-1.07	1631.64
9	1	95	5	2	1	4	3	6	4	0	4	4	0	0	0	0	-1.07	4271.41
9	1	96	6	2	1	4	3	5	1	0	3	3	0	0	0	0	-1.07	2655.53
9	1	97	4	5	1	2	3	6	5	0	2	1	1	0	0	0	-1.07	2111.57
9	1	98	4	5	1	2	3	6	6	0	6	6	0	1	1	0.01	-1.06	1023.65
9	1	99	1	2	6	4	5	3	2	0	2	2	0	0	0	0	-1.06	847.633
9	1	100	6	1	2	3	5	4	5	0	5	6	1	0	0	0	-1.06	3375.44
10	1	1	2	5	3	1	4	6	5	0	2	2	0	1	0	0	0	1610.42
10	1	2	4	1	5	3	6	2	2	0	6	6	0	0	0	0	0	1311.5
10	1	3	4	3	2	5	1	6	4	0	1	5	1	0	0	0	0	2383.51
10	1	4	5	1	4	3	6	2	6	0	5	5	0	1	0	0	0	2239.57
10	1	5	5	1	4	3	6	2	3	0	4	2	1	0	1	0.5	-0.5	6399.36
10	1	6	6	4	3	2	5	1	1	0	6	6	0	1	0	0	-0.5	1855.57
10	1	7	3	6	5	2	4	1	5	0	3	3	0	0	0	0	-0.5	1279.57
10	1	8	6	1	5	2	3	4	2	0	4	4	0	0	0	0	-0.5	2559.51
10	1	9	3	1	2	6	4	5	4	0	5	5	0	0	0	0	-0.5	3103.51
10	1	10	3	1	2	6	4	5	6	0	4	6	1	0	1	0.5	-1	11471.2
10	1	11	6	1	3	4	2	5	3	0	3	3	0	1	0	0	-1	2511.54
10	1	12	1	2	3	6	4	5	1	0	1	1	0	0	0	0	-1	1279.52
10	1	13	6	1	5	3	4	2	5	0	3	3	0	0	0	0	-1	3023.54
10	1	14	6	1	5	3	4	2	2	0	6	4	1	0	1	0.5	-1.5	5791.37
10	1	15	6	3	4	1	5	2	4	0	3	3	0	1	0	0	-1.5	2351.44
10	1	16	4	6	1	2	3	5	6	0	2	2	0	0	0	0	-1.5	2303.57
10	1	17	1	5	4	2	3	6	3	0	5	5	0	0	0	0	-1.5	2799.53
10	1	18	5	4	2	1	6	3	1	0	4	4	0	0	0	0	-1.5	1695.54
10	1	19	5	4	2	1	6	3	5	0	1	2	1	0	1	0.5	-2	2415.58
10	1	20	4	2	5	6	3	1	2	0	2	2	0	1	0	0	-2	2015.56
10	1	21	5	3	1	4	2	6	4	0	4	4	0	0	0	0	-2	2127.52
10	1	22	2	6	1	5	4	3	6	0	2	2	0	0	0	0	-2	3407.51
10	1	23	2	6	1	5	4	3	3	0	6	5	1	0	1	0.5	-2.5	12927.1
10	1	24	6	4	1	3	2	5	1	0	3	3	0	1	0	0	-2.5	2015.57
10	1	25	3	1	4	2	6	5	5	0	6	6	0	0	0	0	-2.5	2111.5
10	1	26	3	1	4	2	6	5	2	0	4	2	1	0	1	0.5	-3	6111.46
10	1	27	1	2	3	6	4	5	4	0	5	5	0	1	0	0	-3	3567.54
10	1	28	6	2	1	4	3	5	6	0	1	1	0	0	0	0	-3	1615.5
10	1	29	6	5	1	3	2	4	3	0	4	4	0	0	0	0	-3	1775.57
10	1	30	6	5	1	3	2	4	1	0	3	6	1	0	1	0.5	-3.5	6511.46
10	1	31	4	3	2	1	6	5	5	0	6	6	0	1	0	0	-3.5	1855.49
10	1	32	3	6	5	2	4	1	2	0	4	4	0	0	0	0	-3.5	1807.49
10	1	33	1	3	5	6	4	2	4	0	5	5	0	0	0	0	-3.5	911.59
10	1	34	1	6	2	3	4	5	6	0	2	1	1	0	0	0	-3.5	2527.38
10	1	35	5	4	3	2	1	6	3	0	3	3	0	1	0	0	-3.5	1647.51
10	1	36	2	5	6	1	3	4	1	0	4	3	1	0	0	0	-3.5	3295.52
10	1	37	5	4	2	6	3	1	5	0	1	1	0	1	0	0	-3.5	2735.44
10	1	38	1	3	2	5	6	4	2	0	3	4	1	0	0	0	-3.5	1887.57
10	1	39	1	3	2	5	6	4	4	0	6	5	1	1	1	0.01	-3.51	10015.2
10	1	40	5	4	2	1	6	3	6	0	5	5	0	1	0	0	-3.51	4335.49
10	1	41	5	6	4	3	1	2	3	0	4	4	0	0	0	0	-3.51	2991.47
10	1	42	4	5	1	2	3	6	1	0	3	3	0	0	0	0	-3.51	1039.53
10	1	43	4	5	1	2	3	6	5	0	2	6	1	0	1	0.5	-4.01	6559.44
10	1	44	6	5	3	4	2	1	2	0	5	5	0	1	0	0	-4.01	1535.52
10	1	45	6	3	4	2	1	5	4	0	3	3	0	0	0	0	-4.01	1839.54
10	1	46	4	5	1	3	2	6	6	0	6	6	0	0	0	0	-4.01	1647.6
10	1	47	6	2	3	1	4	5	3	0	3	3	0	0	0	0	-4.01	1423.46
10	1	48	6	2	3	1	4	5	1	0	4	2	1	0	1	0.5	-4.51	2463.45
10	1	49	2	5	1	4	3	6	5	0	2	2	0	1	0	0	-4.51	1999.56
10	1	50	6	1	2	4	5	3	2	0	3	3	0	0	0	0	-4.51	3759.5
10	1	51	5	3	1	6	2	4	4	0	6	6	0	0	0	0	-4.51	1711.55
10	1	52	1	6	2	5	3	4	6	0	2	2	0	0	0	0	-4.51	1359.54
10	1	53	1	6	2	5	3	4	3	0	5	4	1	0	1	0.5	-5.01	2303.51
10	1	54	6	4	1	5	3	2	1	0	3	3	0	1	0	0	-5.01	1407.59
10	1	55	4	2	1	3	6	5	5	0	6	6	0	0	0	0	-5.01	1839.53
10	1	56	6	4	5	2	1	3	2	0	4	4	0	0	0	0	-5.01	1647.57
10	1	57	4	1	3	6	2	5	4	0	1	1	0	0	0	0	-5.01	1215.61
10	1	58	2	5	6	4	3	1	6	0	3	3	0	0	0	0	-5.01	3999.51
10	1	59	6	2	4	5	1	3	3	0	6	6	0	0	0	0	-5.01	1647.58
10	1	60	6	2	4	5	1	3	1	0	5	5	0	0	1	0.5	-4.51	4623.4
10	1	61	5	4	3	6	1	2	5	0	1	1	0	0	0	0	-4.51	1711.56
10	1	62	4	5	2	1	3	6	2	0	3	3	0	0	0	0	-4.51	1375.47
10	1	63	4	3	5	2	6	1	4	0	1	1	0	0	0	0	-4.51	1231.58
10	1	64	4	3	5	2	6	1	6	0	5	3	1	0	1	0.5	-5.01	5935.44
10	1	65	5	2	6	1	4	3	3	0	6	2	1	1	0	0	-5.01	40942.3
10	1	66	1	2	5	4	3	6	1	0	1	1	0	1	0	0	-5.01	1263.45
10	1	67	6	5	4	1	3	2	5	0	2	2	0	0	0	0	-5.01	1551.61
10	1	68	2	1	5	4	6	3	2	0	1	1	0	0	0	0	-5.01	671.499
10	1	69	2	1	5	4	6	3	4	0	4	2	1	0	1	0.5	-5.51	2431.52
10	1	70	2	4	3	5	6	1	6	0	5	5	0	1	0	0	-5.51	1375.53
10	1	71	1	3	5	2	6	4	3	0	2	2	0	0	0	0	-5.51	1183.55
10	1	72	3	6	4	5	2	1	1	0	6	6	0	0	0	0	-5.51	2735.6
10	1	73	4	6	1	5	2	3	5	0	4	4	0	0	0	0	-5.51	1503.55
10	1	74	4	6	1	5	2	3	2	0	5	2	1	0	1	0.01	-5.52	4863.49
10	1	75	1	4	2	6	5	3	4	0	2	2	0	1	0	0	-5.52	1823.52
10	1	76	4	5	1	3	2	6	6	0	6	6	0	0	0	0	-5.52	3439.42
10	1	77	4	5	1	3	2	6	3	0	4	1	1	0	1	0.5	-6.02	4335.44
10	1	78	3	4	5	2	6	1	1	0	6	6	0	1	0	0	-6.02	2495.53
10	1	79	3	2	4	1	5	6	5	0	5	5	0	0	0	0	-6.02	4191.4
10	1	80	1	5	2	6	4	3	2	0	3	3	0	0	0	0	-6.02	2463.45
10	1	81	2	5	1	3	4	6	4	0	5	5	0	0	0	0	-6.02	1391.48
10	1	82	2	5	1	3	4	6	6	0	6	3	1	0	1	0.5	-6.52	2879.46
10	1	83	6	3	4	1	5	2	3	0	2	2	0	1	0	0	-6.52	3567.41
10	1	84	1	5	2	6	4	3	1	0	1	1	0	0	0	0	-6.52	1807.48
10	1	85	5	1	3	6	2	4	5	0	1	1	0	0	0	0	-6.52	2607.49
10	1	86	1	4	6	5	2	3	2	0	5	5	0	0	0	0	-6.52	2079.51
10	1	87	1	4	6	5	2	3	4	0	2	6	1	0	1	0.5	-7.02	2735.45
10	1	88	5	2	3	6	1	4	6	0	4	4	0	1	0	0	-7.02	2399.5
10	1	89	3	5	6	4	1	2	3	0	1	1	0	0	0	0	-7.02	2255.5
10	1	90	5	4	3	2	1	6	1	0	5	5	0	0	0	0	-7.02	1487.56
10	1	91	6	1	2	3	4	5	5	0	6	6	0	0	0	0	-7.02	1647.54
10	1	92	2	1	6	4	5	3	2	0	1	1	0	0	0	0	-7.02	3423.44
10	1	93	2	1	6	4	5	3	4	0	4	3	1	0	1	0.5	-7.52	3407.49
10	1	94	4	1	3	2	6	5	6	0	5	5	0	1	0	0	-7.52	1935.55
10	1	95	3	4	2	6	1	5	3	0	1	1	0	0	0	0	-7.52	1471.45
10	1	96	5	4	6	2	3	1	1	0	6	6	0	0	0	0	-7.52	2447.47
10	1	97	6	3	2	5	4	1	5	0	4	4	0	0	0	0	-7.52	2111.44
10	1	98	6	3	2	5	4	1	2	0	3	1	1	0	1	0.5	-8.02	5215.48
10	1	99	1	3	2	6	4	5	4	0	5	5	0	1	0	0	-8.02	3439.41
10	1	100	1	2	4	6	3	5	6	0	4	4	0	0	0	0	-8.02	6399.37
11	2	1	2	5	3	1	4	6	0	5	2	2	0	0	0	0	0	945.135
11	2	2	4	1	5	3	6	2	0	2	6	6	0	0	0	0	0	845.027
11	2	3	4	3	2	5	1	6	0	4	1	1	0	0	0	0	0	637.074
11	2	4	5	1	4	3	6	2	0	6	5	5	0	0	0	0	0	765.136
11	2	5	5	1	4	3	6	2	0	3	4	3	1	0	1	0.01	-0.01	1116.99
11	2	6	6	4	3	2	5	1	0	1	6	6	0	1	0	0	-0.01	1229.13
11	2	7	3	6	5	2	4	1	0	5	3	2	1	0	0	0	-0.01	845.076
11	2	8	6	1	5	2	3	4	0	2	4	4	0	1	0	0	-0.01	1597.14
11	2	9	3	1	2	6	4	5	0	4	5	5	0	0	0	0	-0.01	653.128
11	2	10	3	1	2	6	4	5	0	6	4	6	1	0	1	0.01	-0.02	1085.12
11	2	11	6	1	3	4	2	5	0	3	3	3	0	1	0	0	-0.02	845.143
11	2	12	1	2	3	6	4	5	0	1	1	1	0	0	0	0	-0.02	845.083
11	2	13	6	1	5	3	4	2	0	5	3	3	0	0	0	0	-0.02	781.101
11	2	14	6	1	5	3	4	2	0	2	6	5	1	0	1	0.01	-0.03	3165.03
11	2	15	6	3	4	1	5	2	0	4	3	3	0	1	0	0	-0.03	797.087
11	2	16	4	6	1	2	3	5	0	6	2	2	0	0	0	0	-0.03	1357.13
11	2	17	1	5	4	2	3	6	0	3	5	5	0	0	0	0	-0.03	893.061
11	2	18	5	4	2	1	6	3	0	1	4	4	0	0	0	0	-0.03	797.129
11	2	19	5	4	2	1	6	3	0	5	1	6	1	0	1	0.01	-0.04	1517.15
11	2	20	4	2	5	6	3	1	0	2	2	3	1	1	0	0	-0.04	1853.11
11	2	21	5	3	1	4	2	6	0	4	4	4	0	1	0	0	-0.04	653.073
11	2	22	2	6	1	5	4	3	0	6	2	2	0	0	0	0	-0.04	941.139
11	2	23	2	6	1	5	4	3	0	3	6	5	1	0	1	0.01	-0.05	925.062
11	2	24	6	4	1	3	2	5	0	1	3	3	0	1	0	0	-0.05	845.101
11	2	25	3	1	4	2	6	5	0	5	6	6	0	0	0	0	-0.05	637.127
11	2	26	3	1	4	2	6	5	0	2	4	1	1	0	1	0.01	-0.06	685.124
11	2	27	1	2	3	6	4	5	0	4	5	5	0	1	0	0	-0.06	909.133
11	2	28	6	2	1	4	3	5	0	6	1	1	0	0	0	0	-0.06	1021.07
11	2	29	6	5	1	3	2	4	0	3	4	4	0	0	0	0	-0.06	557.148
11	2	30	6	5	1	3	2	4	0	1	3	2	1	0	1	0.01	-0.07	781.121
11	2	31	4	3	2	1	6	5	0	5	6	6	0	1	0	0	-0.07	1213.15
11	2	32	3	6	5	2	4	1	0	2	4	4	0	0	0	0	-0.07	957.072
11	2	33	1	3	5	6	4	2	0	4	5	5	0	0	0	0	-0.07	829.172
11	2	34	1	6	2	3	4	5	0	6	2	2	0	0	0	0	-0.07	717.12
11	2	35	5	4	3	2	1	6	0	3	3	3	0	0	0	0	-0.07	733.085
11	2	36	2	5	6	1	3	4	0	1	4	4	0	0	0	0	-0.07	1261.09
11	2	37	5	4	2	6	3	1	0	5	1	1	0	0	0	0	-0.07	1149.07
11	2	38	1	3	2	5	6	4	0	2	3	3	0	0	0	0	-0.07	909.141
11	2	39	1	3	2	5	6	4	0	4	6	5	1	0	1	0.01	-0.08	765.109
11	2	40	5	4	2	1	6	3	0	6	5	5	0	1	0	0	-0.08	829.124
11	2	41	5	6	4	3	1	2	0	3	4	4	0	0	0	0	-0.08	525.07
11	2	42	4	5	1	2	3	6	0	1	3	3	0	0	0	0	-0.08	941.126
11	2	43	4	5	1	2	3	6	0	5	2	1	1	0	1	0.01	-0.09	925.096
11	2	44	6	5	3	4	2	1	0	2	5	5	0	1	0	0	-0.09	893.107
11	2	45	6	3	4	2	1	5	0	4	3	3	0	0	0	0	-0.09	765.188
11	2	46	4	5	1	3	2	6	0	6	6	6	0	0	0	0	-0.09	829.076
11	2	47	6	2	3	1	4	5	0	3	3	2	1	0	0	0	-0.09	685.165
11	2	48	6	2	3	1	4	5	0	1	4	3	1	1	1	0.01	-0.1	973.067
11	2	49	2	5	1	4	3	6	0	5	2	2	0	1	0	0	-0.1	1053.12
11	2	50	6	1	2	4	5	3	0	2	3	3	0	0	0	0	-0.1	1389.05
11	2	51	5	3	1	6	2	4	0	4	6	6	0	0	0	0	-0.1	669.12
11	2	52	1	6	2	5	3	4	0	6	2	2	0	0	0	0	-0.1	701.145
11	2	53	1	6	2	5	3	4	0	3	5	3	1	0	1	0.01	-0.11	1293.11
11	2	54	6	4	1	5	3	2	0	1	3	3	0	1	0	0	-0.11	1005.08
11	2	55	4	2	1	3	6	5	0	5	6	6	0	0	0	0	-0.11	797.125
11	2	56	6	4	5	2	1	3	0	2	4	4	0	0	0	0	-0.11	1053.14
11	2	57	4	1	3	6	2	5	0	4	1	1	0	0	0	0	-0.11	701.09
11	2	58	2	5	6	4	3	1	0	6	3	3	0	0	0	0	-0.11	1053.16
11	2	59	6	2	4	5	1	3	0	3	6	5	1	0	0	0	-0.11	781.062
11	2	60	6	2	4	5	1	3	0	1	5	5	0	1	1	0.01	-0.1	909.165
11	2	61	5	4	3	6	1	2	0	5	1	1	0	0	0	0	-0.1	1069.06
11	2	62	4	5	2	1	3	6	0	2	3	3	0	0	0	0	-0.1	1053.13
11	2	63	4	3	5	2	6	1	0	4	1	1	0	0	0	0	-0.1	781.113
11	2	64	4	3	5	2	6	1	0	6	5	3	1	0	1	0.01	-0.11	1469.13
11	2	65	5	2	6	1	4	3	0	3	6	6	0	1	0	0	-0.11	893.114
11	2	66	1	2	5	4	3	6	0	1	1	1	0	0	0	0	-0.11	861.178
11	2	67	6	5	4	1	3	2	0	5	2	3	1	0	0	0	-0.11	765.083
11	2	68	2	1	5	4	6	3	0	2	1	1	0	1	0	0	-0.11	1229.09
11	2	69	2	1	5	4	6	3	0	4	4	2	1	0	1	0.01	-0.12	1021.15
11	2	70	2	4	3	5	6	1	0	6	5	5	0	1	0	0	-0.12	717.154
11	2	71	1	3	5	2	6	4	0	3	2	2	0	0	0	0	-0.12	653.124
11	2	72	3	6	4	5	2	1	0	1	6	6	0	0	0	0	-0.12	749.165
11	2	73	4	6	1	5	2	3	0	5	4	4	0	0	0	0	-0.12	733.123
11	2	74	4	6	1	5	2	3	0	2	5	1	1	0	1	0.01	-0.13	861.158
11	2	75	1	4	2	6	5	3	0	4	2	2	0	1	0	0	-0.13	749.162
11	2	76	4	5	1	3	2	6	0	6	6	6	0	0	0	0	-0.13	717.112
11	2	77	4	5	1	3	2	6	0	3	4	3	1	0	1	0.01	-0.14	989.074
11	2	78	3	4	5	2	6	1	0	1	6	6	0	1	0	0	-0.14	989.163
11	2	79	3	2	4	1	5	6	0	5	5	5	0	0	0	0	-0.14	685.104
11	2	80	1	5	2	6	4	3	0	2	3	3	0	0	0	0	-0.14	845.16
11	2	81	2	5	1	3	4	6	0	4	5	5	0	0	0	0	-0.14	701.047
11	2	82	2	5	1	3	4	6	0	6	6	1	1	0	1	0.01	-0.15	813.156
11	2	83	6	3	4	1	5	2	0	3	2	2	0	1	0	0	-0.15	733.211
11	2	84	1	5	2	6	4	3	0	1	1	1	0	0	0	0	-0.15	813.097
11	2	85	5	1	3	6	2	4	0	5	1	1	0	0	0	0	-0.15	1565.07
11	2	86	1	4	6	5	2	3	0	2	5	5	0	0	0	0	-0.15	1260.99
11	2	87	1	4	6	5	2	3	0	4	2	4	1	0	1	0.01	-0.16	1165.12
11	2	88	5	2	3	6	1	4	0	6	4	4	0	1	0	0	-0.16	845.154
11	2	89	3	5	6	4	1	2	0	3	1	1	0	0	0	0	-0.16	637.088
11	2	90	5	4	3	2	1	6	0	1	5	6	1	0	0	0	-0.16	1149.18
11	2	91	6	1	2	3	4	5	0	5	6	6	0	1	0	0	-0.16	1517.07
11	2	92	2	1	6	4	5	3	0	2	1	1	0	0	0	0	-0.16	925.11
11	2	93	2	1	6	4	5	3	0	4	4	2	1	0	1	0.01	-0.17	717.102
11	2	94	4	1	3	2	6	5	0	6	5	3	1	1	0	0	-0.17	1565.1
11	2	95	3	4	2	6	1	5	0	3	1	1	0	1	0	0	-0.17	685.056
11	2	96	5	4	6	2	3	1	0	1	6	6	0	0	0	0	-0.17	653.176
11	2	97	6	3	2	5	4	1	0	5	4	4	0	0	0	0	-0.17	1421.11
11	2	98	6	3	2	5	4	1	0	2	3	5	1	0	1	0.01	-0.18	829.146
11	2	99	1	3	2	6	4	5	0	4	5	5	0	1	0	0	-0.18	717.113
11	2	100	1	2	4	6	3	5	0	6	4	4	0	0	0	0	-0.18	829.062
12	2	1	4	1	5	2	6	3	0	2	4	4	0	0	0	0	0	14111.4
12	2	2	5	2	3	1	6	4	0	5	1	1	0	0	0	0	0	1037.06
12	2	3	5	3	1	6	4	2	0	3	2	2	0	0	0	0	0	1165.21
12	2	4	2	5	4	1	6	3	0	4	3	3	0	0	0	0	0	1853.18
12	2	5	2	5	4	1	6	3	0	1	4	5	1	0	1	0.01	-0.01	2365.08
12	2	6	5	3	6	2	4	1	0	5	1	1	0	1	0	0	-0.01	1885.16
12	2	7	1	4	6	5	2	3	0	6	3	2	1	0	0	0	-0.01	4045.14
12	2	8	4	2	3	5	6	1	0	2	2	2	0	1	0	0	-0.01	1613.12
12	2	9	3	4	1	6	2	5	0	5	6	2	1	0	0	0	-0.01	3229.16
12	2	10	3	4	1	6	2	5	0	3	1	2	1	1	1	0.01	-0.02	5149.07
12	2	11	5	2	1	4	6	3	0	4	4	4	0	1	0	0	-0.02	1197.17
12	2	12	2	3	1	6	5	4	0	1	3	3	0	0	0	0	-0.02	1117.16
12	2	13	6	2	5	1	3	4	0	5	3	3	0	0	0	0	-0.02	1341.11
12	2	14	6	2	5	1	3	4	0	6	1	4	1	0	1	0.01	-0.03	5021.1
12	2	15	4	2	6	5	1	3	0	2	2	2	0	1	0	0	-0.03	1485.21
12	2	16	2	4	5	3	6	1	0	5	3	3	0	0	0	0	-0.03	1773.16
12	2	17	1	6	2	5	3	4	0	3	5	5	0	0	0	0	-0.03	1389.18
12	2	18	6	1	2	4	5	3	0	4	4	4	0	0	0	0	-0.03	1133.12
12	2	19	6	1	2	4	5	3	0	1	2	2	0	0	1	0.01	-0.02	4925.09
12	2	20	6	4	5	2	1	3	0	5	3	3	0	0	0	0	-0.02	1501.21
12	2	21	6	2	1	5	3	4	0	6	1	1	0	0	0	0	-0.02	1677.17
12	2	22	1	5	4	2	3	6	0	2	4	4	0	0	0	0	-0.02	1213.21
12	2	23	1	5	4	2	3	6	0	5	2	6	1	0	1	0.5	-0.52	3021.14
12	2	24	1	2	3	6	5	4	0	3	3	3	0	1	0	0	-0.52	1421.13
12	2	25	1	6	2	5	4	3	0	4	5	5	0	0	0	0	-0.52	1133.18
12	2	26	1	6	2	5	4	3	0	1	1	4	1	0	1	0.01	-0.53	10252.9
12	2	27	1	3	2	4	6	5	0	5	6	6	0	1	0	0	-0.53	1277.23
12	2	28	3	4	5	6	1	2	0	6	4	4	0	0	0	0	-0.53	1133.18
12	2	29	5	2	4	1	6	3	0	2	2	2	0	0	0	0	-0.53	1485.19
12	2	30	5	2	4	1	6	3	0	5	1	1	0	0	1	0.01	-0.52	2765.19
12	2	31	2	6	3	4	1	5	0	3	3	3	0	0	0	0	-0.52	1277.24
12	2	32	5	3	6	2	1	4	0	4	6	6	0	0	0	0	-0.52	1245.14
12	2	33	3	2	5	1	6	4	0	1	4	4	0	0	0	0	-0.52	1213.25
12	2	34	4	6	1	3	5	2	0	5	5	5	0	0	0	0	-0.52	1501.16
12	2	35	3	4	6	1	5	2	0	6	3	3	0	0	0	0	-0.52	1181.19
12	2	36	2	6	3	5	1	4	0	2	1	5	1	0	0	0	-0.52	1453.21
12	2	37	1	6	3	4	2	5	0	5	6	6	0	1	0	0	-0.52	2013.16
12	2	38	2	6	4	5	3	1	0	3	5	5	0	0	0	0	-0.52	1197.21
12	2	39	2	6	4	5	3	1	0	4	3	2	1	0	1	0.01	-0.53	4349.11
12	2	40	6	2	4	3	1	5	0	1	5	5	0	1	0	0	-0.53	1261.18
12	2	41	4	1	3	6	2	5	0	5	6	6	0	0	0	0	-0.53	1197.23
12	2	42	6	3	2	5	1	4	0	6	1	1	0	0	0	0	-0.53	1661.13
12	2	43	6	3	2	5	1	4	0	2	3	2	1	0	1	0.5	-1.03	1485.19
12	2	44	5	4	6	1	3	2	0	5	1	1	0	1	0	0	-1.03	1549.19
12	2	45	5	4	6	2	1	3	0	3	6	6	0	0	0	0	-1.03	957.247
12	2	46	2	4	3	5	6	1	0	4	2	2	0	0	0	0	-1.03	1709.2
12	2	47	6	4	5	2	1	3	0	1	5	5	0	0	0	0	-1.03	1373.19
12	2	48	6	4	5	2	1	3	0	5	3	3	0	0	1	0.01	-1.02	3117.1
12	2	49	6	3	1	4	2	5	0	6	1	1	0	0	0	0	-1.02	989.23
12	2	50	6	2	5	3	4	1	0	2	2	2	0	0	0	0	-1.02	1309.21
12	2	51	6	3	2	5	4	1	0	5	4	4	0	0	0	0	-1.02	1261.21
12	2	52	1	6	3	5	2	4	0	3	3	3	0	0	0	0	-1.02	1245.17
12	2	53	1	6	3	5	2	4	0	4	6	6	0	0	1	0.01	-1.01	1853.2
12	2	54	3	1	2	5	6	4	0	1	2	2	0	0	0	0	-1.01	1005.19
12	2	55	4	2	3	5	6	1	0	5	4	4	0	0	0	0	-1.01	1133.21
12	2	56	5	2	6	3	1	4	0	6	3	3	0	0	0	0	-1.01	1053.19
12	2	57	2	4	6	1	3	5	0	2	1	1	0	0	0	0	-1.01	1725.23
12	2	58	1	3	6	2	5	4	0	5	5	5	0	0	0	0	-1.01	1613.13
12	2	59	6	4	1	3	5	2	0	3	4	6	1	0	0	0	-1.01	2077.22
12	2	60	1	4	2	6	3	5	0	4	2	3	1	1	1	0.01	-1.02	5773.03
12	2	61	1	5	3	4	6	2	0	1	1	1	0	1	0	0	-1.02	1005.27
12	2	62	6	1	3	4	2	5	0	5	6	6	0	0	0	0	-1.02	1261.2
12	2	63	5	2	4	1	3	6	0	6	6	6	0	0	0	0	-1.02	1773.19
12	2	64	5	2	4	1	3	6	0	2	2	3	1	0	1	0.01	-1.03	2589.16
12	2	65	5	1	6	2	4	3	0	5	1	1	0	1	0	0	-1.03	1149.25
12	2	66	1	4	2	5	6	3	0	3	6	6	0	0	0	0	-1.03	1229.16
12	2	67	3	6	2	5	4	1	0	4	5	5	0	0	0	0	-1.03	1501.23
12	2	68	6	5	4	3	2	1	0	1	6	6	0	0	0	0	-1.03	1517.16
12	2	69	6	5	4	3	2	1	0	5	2	5	1	0	1	0.01	-1.04	3181.2
12	2	70	6	1	5	3	2	4	0	6	1	1	0	1	0	0	-1.04	1309.2
12	2	71	5	3	4	2	6	1	0	2	4	4	0	0	0	0	-1.04	2205.1
12	2	72	2	4	6	1	5	3	0	5	5	5	0	0	0	0	-1.04	1325.17
12	2	73	5	3	4	2	1	6	0	3	2	2	0	0	0	0	-1.04	1533.23
12	2	74	5	3	4	2	1	6	0	4	3	6	1	0	1	0.01	-1.05	5501.05
12	2	75	5	2	3	1	4	6	0	1	4	4	0	1	0	0	-1.05	1917.19
12	2	76	6	5	3	4	2	1	0	5	2	2	0	0	0	0	-1.05	1181.19
12	2	77	6	5	3	4	2	1	0	6	1	4	1	0	1	0.01	-1.06	5901.04
12	2	78	4	1	2	3	5	6	0	2	3	3	0	1	0	0	-1.06	1149.17
12	2	79	1	4	6	2	3	5	0	5	6	6	0	0	0	0	-1.06	1085.18
12	2	80	4	1	5	2	3	6	0	3	5	5	0	0	0	0	-1.06	1229.17
12	2	81	4	1	2	5	3	6	0	4	1	1	0	0	0	0	-1.06	1613.23
12	2	82	4	1	2	5	3	6	0	1	2	3	1	0	1	0.01	-1.07	1549.17
12	2	83	5	4	6	3	2	1	0	5	1	1	0	1	0	0	-1.07	1309.16
12	2	84	4	1	5	2	6	3	0	6	5	5	0	0	0	0	-1.07	1117.25
12	2	85	4	1	2	6	3	5	0	2	3	3	0	0	0	0	-1.07	1101.19
12	2	86	6	2	4	3	1	5	0	5	6	6	0	0	0	0	-1.07	1469.21
12	2	87	6	2	4	3	1	5	0	3	4	1	1	0	1	0.01	-1.08	2525.17
12	2	88	2	3	6	5	4	1	0	4	5	5	0	1	0	0	-1.08	893.246
12	2	89	4	1	3	2	6	5	0	1	2	2	0	0	0	0	-1.08	1053.18
12	2	90	5	1	2	4	3	6	0	5	1	1	0	0	0	0	-1.08	1245.26
12	2	91	2	4	3	5	1	6	0	6	6	6	0	0	0	0	-1.08	749.173
12	2	92	2	4	1	6	5	3	0	2	1	1	0	0	0	0	-1.08	1949.16
12	2	93	2	4	1	6	5	3	0	5	5	6	1	0	1	0.01	-1.09	3261.18
12	2	94	1	3	4	5	6	2	0	3	2	2	0	1	0	0	-1.09	877.242
12	2	95	5	2	1	4	3	6	0	4	4	4	0	0	0	0	-1.09	1085.08
12	2	96	6	2	1	4	3	5	0	1	3	3	0	0	0	0	-1.09	1005.26
12	2	97	4	5	1	2	3	6	0	5	2	2	0	0	0	0	-1.09	1037.24
12	2	98	4	5	1	2	3	6	0	6	6	5	1	0	1	0.01	-1.1	1773.14
12	2	99	1	2	6	4	5	3	0	2	2	2	0	1	0	0	-1.1	1053.25
12	2	100	6	1	2	3	5	4	0	5	5	5	0	0	0	0	-1.1	1085.15
13	1	1	4	1	5	2	6	3	2	0	4	4	0	0	0	0	0	1695.53
13	1	2	5	2	3	1	6	4	5	0	1	3	1	0	0	0	0	5791.38
13	1	3	5	3	1	6	4	2	3	0	2	2	0	1	0	0	0	1199.56
13	1	4	2	5	4	1	6	3	4	0	3	3	0	0	0	0	0	831.64
13	1	5	2	5	4	1	6	3	1	0	4	1	1	0	1	0.01	-0.01	6143.41
13	1	6	5	3	6	2	4	1	5	0	1	1	0	1	0	0	-0.01	1103.62
13	1	7	1	4	6	5	2	3	6	0	3	3	0	0	0	0	-0.01	1247.63
13	1	8	4	2	3	5	6	1	2	0	2	2	0	0	0	0	-0.01	783.6
13	1	9	3	4	1	6	2	5	5	0	6	6	0	0	0	0	-0.01	879.623
13	1	10	3	4	1	6	2	5	3	0	1	4	1	0	1	0.01	-0.02	4479.52
13	1	11	5	2	1	4	6	3	4	0	4	4	0	1	0	0	-0.02	1023.63
13	1	12	2	3	1	6	5	4	1	0	3	3	0	0	0	0	-0.02	927.626
13	1	13	6	2	5	1	3	4	5	0	3	3	0	0	0	0	-0.02	2991.56
13	1	14	6	2	5	1	3	4	6	0	1	2	1	0	1	0.01	-0.03	2031.53
13	1	15	4	2	6	5	1	3	2	0	2	2	0	1	0	0	-0.03	1631.61
13	1	16	2	4	5	3	6	1	5	0	3	3	0	0	0	0	-0.03	1071.64
13	1	17	1	6	2	5	3	4	3	0	5	5	0	0	0	0	-0.03	2319.58
13	1	18	6	1	2	4	5	3	4	0	4	4	0	0	0	0	-0.03	831.569
13	1	19	6	1	2	4	5	3	1	0	2	6	1	0	1	0.5	-0.53	1759.6
13	1	20	6	4	5	2	1	3	5	0	3	3	0	1	0	0	-0.53	1567.62
13	1	21	6	2	1	5	3	4	6	0	1	1	0	0	0	0	-0.53	1055.63
13	1	22	1	5	4	2	3	6	2	0	4	4	0	0	0	0	-0.53	1167.48
13	1	23	1	5	4	2	3	6	5	0	2	6	1	0	1	0.5	-1.03	3455.53
13	1	24	1	2	3	6	5	4	3	0	3	3	0	1	0	0	-1.03	1375.65
13	1	25	1	6	2	5	4	3	4	0	5	5	0	0	0	0	-1.03	1279.5
13	1	26	1	6	2	5	4	3	1	0	1	4	1	0	1	0.01	-1.04	3391.52
13	1	27	1	3	2	4	6	5	5	0	6	6	0	1	0	0	-1.04	815.639
13	1	28	3	4	5	6	1	2	6	0	4	4	0	0	0	0	-1.04	879.626
13	1	29	5	2	4	1	6	3	2	0	2	2	0	0	0	0	-1.04	911.577
13	1	30	5	2	4	1	6	3	5	0	1	3	1	0	1	0.01	-1.05	3327.57
13	1	31	2	6	3	4	1	5	3	0	3	3	0	1	0	0	-1.05	1087.61
13	1	32	5	3	6	2	1	4	4	0	6	6	0	0	0	0	-1.05	607.654
13	1	33	3	2	5	1	6	4	1	0	4	4	0	0	0	0	-1.05	1871.61
13	1	34	4	6	1	3	5	2	5	0	5	5	0	0	0	0	-1.05	879.598
13	1	35	3	4	6	1	5	2	6	0	3	3	0	0	0	0	-1.05	895.569
13	1	36	2	6	3	5	1	4	2	0	1	1	0	0	0	0	-1.05	1199.56
13	1	37	1	6	3	4	2	5	5	0	6	6	0	0	0	0	-1.05	783.668
13	1	38	2	6	4	5	3	1	3	0	5	5	0	0	0	0	-1.05	975.56
13	1	39	2	6	4	5	3	1	4	0	3	4	1	0	1	0.5	-1.55	4159.42
13	1	40	6	2	4	3	1	5	1	0	5	5	0	1	0	0	-1.55	1295.56
13	1	41	4	1	3	6	2	5	5	0	6	6	0	0	0	0	-1.55	863.604
13	1	42	6	3	2	5	1	4	6	0	1	1	0	0	0	0	-1.55	1007.64
13	1	43	6	3	2	5	1	4	2	0	3	2	1	0	1	0.5	-2.05	1855.58
13	1	44	5	4	6	1	3	2	5	0	1	1	0	1	0	0	-2.05	719.649
13	1	45	5	4	6	2	1	3	3	0	6	6	0	0	0	0	-2.05	591.587
13	1	46	2	4	3	5	6	1	4	0	2	2	0	0	0	0	-2.05	847.603
13	1	47	6	4	5	2	1	3	1	0	5	5	0	0	0	0	-2.05	623.536
13	1	48	6	4	5	2	1	3	5	0	3	3	0	0	1	0.5	-1.55	2271.57
13	1	49	6	3	1	4	2	5	6	0	1	1	0	0	0	0	-1.55	959.591
13	1	50	6	2	5	3	4	1	2	0	2	2	0	0	0	0	-1.55	703.619
13	1	51	6	3	2	5	4	1	5	0	4	4	0	0	0	0	-1.55	815.649
13	1	52	1	6	3	5	2	4	3	0	3	3	0	0	0	0	-1.55	1055.6
13	1	53	1	6	3	5	2	4	4	0	6	5	1	0	1	0.5	-2.05	3295.51
13	1	54	3	1	2	5	6	4	1	0	2	2	0	1	0	0	-2.05	671.631
13	1	55	4	2	3	5	6	1	5	0	4	4	0	0	0	0	-2.05	719.59
13	1	56	5	2	6	3	1	4	6	0	3	3	0	0	0	0	-2.05	847.678
13	1	57	2	4	6	1	3	5	2	0	1	1	0	0	0	0	-2.05	751.522
13	1	58	1	3	6	2	5	4	5	0	5	5	0	0	0	0	-2.05	671.627
13	1	59	6	4	1	3	5	2	3	0	4	4	0	0	0	0	-2.05	1087.6
13	1	60	1	4	2	6	3	5	4	0	2	1	1	0	1	0.5	-2.55	2527.53
13	1	61	1	5	3	4	6	2	1	0	1	1	0	1	0	0	-2.55	1071.61
13	1	62	6	1	3	4	2	5	5	0	6	6	0	0	0	0	-2.55	799.624
13	1	63	5	2	4	1	3	6	6	0	6	6	0	0	0	0	-2.55	1039.59
13	1	64	5	2	4	1	3	6	2	0	2	1	1	0	1	0.5	-3.05	4287.48
13	1	65	5	1	6	2	4	3	5	0	1	1	0	1	0	0	-3.05	815.647
13	1	66	1	4	2	5	6	3	3	0	6	6	0	0	0	0	-3.05	767.603
13	1	67	3	6	2	5	4	1	4	0	5	5	0	0	0	0	-3.05	895.615
13	1	68	6	5	4	3	2	1	1	0	6	6	0	0	0	0	-3.05	1551.58
13	1	69	6	5	4	3	2	1	5	0	2	2	0	0	1	0.01	-3.04	1807.6
13	1	70	6	1	5	3	2	4	6	0	1	1	0	0	0	0	-3.04	1583.64
13	1	71	5	3	4	2	6	1	2	0	4	4	0	0	0	0	-3.04	959.524
13	1	72	2	4	6	1	5	3	5	0	5	5	0	0	0	0	-3.04	991.657
13	1	73	5	3	4	2	1	6	3	0	2	2	0	0	0	0	-3.04	2543.49
13	1	74	5	3	4	2	1	6	4	0	3	3	0	0	1	0.5	-2.54	4255.48
13	1	75	5	2	3	1	4	6	1	0	4	4	0	0	0	0	-2.54	687.643
13	1	76	6	5	3	4	2	1	5	0	2	2	0	0	0	0	-2.54	927.634
13	1	77	6	5	3	4	2	1	6	0	1	5	1	0	1	0.01	-2.55	2335.6
13	1	78	4	1	2	3	5	6	2	0	3	3	0	1	0	0	-2.55	959.662
13	1	79	1	4	6	2	3	5	5	0	6	6	0	0	0	0	-2.55	959.644
13	1	80	4	1	5	2	3	6	3	0	5	5	0	0	0	0	-2.55	1375.59
13	1	81	4	1	2	5	3	6	4	0	1	1	0	0	0	0	-2.55	2063.6
13	1	82	4	1	2	5	3	6	1	0	2	4	1	0	1	0.5	-3.05	2175.61
13	1	83	5	4	6	3	2	1	5	0	1	1	0	1	0	0	-3.05	751.577
13	1	84	4	1	5	2	6	3	6	0	5	5	0	0	0	0	-3.05	863.61
13	1	85	4	1	2	6	3	5	2	0	3	3	0	0	0	0	-3.05	959.659
13	1	86	6	2	4	3	1	5	5	0	6	6	0	0	0	0	-3.05	959.613
13	1	87	6	2	4	3	1	5	3	0	4	2	1	0	1	0.01	-3.06	1935.54
13	1	88	2	3	6	5	4	1	4	0	5	5	0	1	0	0	-3.06	751.643
13	1	89	4	1	3	2	6	5	1	0	2	2	0	0	0	0	-3.06	1279.59
13	1	90	5	1	2	4	3	6	5	0	1	1	0	0	0	0	-3.06	1119.59
13	1	91	2	4	3	5	1	6	6	0	6	6	0	0	0	0	-3.06	959.634
13	1	92	2	4	1	6	5	3	2	0	1	1	0	0	0	0	-3.06	1263.54
13	1	93	2	4	1	6	5	3	5	0	5	5	0	0	1	0.01	-3.05	1311.58
13	1	94	1	3	4	5	6	2	3	0	2	2	0	0	0	0	-3.05	1055.61
13	1	95	5	2	1	4	3	6	4	0	4	4	0	0	0	0	-3.05	1887.52
13	1	96	6	2	1	4	3	5	1	0	3	3	0	0	0	0	-3.05	1183.61
13	1	97	4	5	1	2	3	6	5	0	2	2	0	0	0	0	-3.05	1087.61
13	1	98	4	5	1	2	3	6	6	0	6	4	1	0	1	0.01	-3.06	1887.61
13	1	99	1	2	6	4	5	3	2	0	2	2	0	1	0	0	-3.06	1279.66
13	1	100	6	1	2	3	5	4	5	0	5	5	0	0	0	0	-3.06	1055.63
14	1	1	2	5	3	1	4	6	5	0	2	2	0	0	0	0	0	1007.79
14	1	2	4	1	5	3	6	2	2	0	6	6	0	0	0	0	0	687.549
14	1	3	4	3	2	5	1	6	4	0	1	1	0	0	0	0	0	6671.45
14	1	4	5	1	4	3	6	2	6	0	5	5	0	0	0	0	0	991.585
14	1	5	5	1	4	3	6	2	3	0	4	4	0	0	1	0.5	0.5	2847.43
14	1	6	6	4	3	2	5	1	1	0	6	6	0	0	0	0	0.5	783.602
14	1	7	3	6	5	2	4	1	5	0	3	3	0	0	0	0	0.5	895.523
14	1	8	6	1	5	2	3	4	2	0	4	5	1	0	0	0	0.5	751.617
14	1	9	3	1	2	6	4	5	4	0	5	5	0	1	0	0	0.5	2831.52
14	1	10	3	1	2	6	4	5	6	0	4	1	1	0	1	0.5	0	2159.47
14	1	11	6	1	3	4	2	5	3	0	3	3	0	1	0	0	0	1119.62
14	1	12	1	2	3	6	4	5	1	0	1	1	0	0	0	0	0	2207.5
14	1	13	6	1	5	3	4	2	5	0	3	3	0	0	0	0	0	799.686
14	1	14	6	1	5	3	4	2	2	0	6	4	1	0	1	0.5	-0.5	1631.63
14	1	15	6	3	4	1	5	2	4	0	3	3	0	1	0	0	-0.5	847.523
14	1	16	4	6	1	2	3	5	6	0	2	2	0	0	0	0	-0.5	783.577
14	1	17	1	5	4	2	3	6	3	0	5	6	1	0	0	0	-0.5	1487.61
14	1	18	5	4	2	1	6	3	1	0	4	4	0	1	0	0	-0.5	751.663
14	1	19	5	4	2	1	6	3	5	0	1	6	1	0	1	0.5	-1	1551.54
14	1	20	4	2	5	6	3	1	2	0	2	2	0	1	0	0	-1	783.549
14	1	21	5	3	1	4	2	6	4	0	4	4	0	0	0	0	-1	783.654
14	1	22	2	6	1	5	4	3	6	0	2	2	0	0	0	0	-1	783.558
14	1	23	2	6	1	5	4	3	3	0	6	6	0	0	1	0.5	-0.5	1807.54
14	1	24	6	4	1	3	2	5	1	0	3	3	0	0	0	0	-0.5	751.605
14	1	25	3	1	4	2	6	5	5	0	6	6	0	0	0	0	-0.5	847.455
14	1	26	3	1	4	2	6	5	2	0	4	1	1	0	1	0.5	-1	1247.66
14	1	27	1	2	3	6	4	5	4	0	5	5	0	1	0	0	-1	911.616
14	1	28	6	2	1	4	3	5	6	0	1	1	0	0	0	0	-1	639.643
14	1	29	6	5	1	3	2	4	3	0	4	4	0	0	0	0	-1	719.62
14	1	30	6	5	1	3	2	4	1	0	3	4	1	0	1	0.5	-1.5	1471.55
14	1	31	4	3	2	1	6	5	5	0	6	6	0	1	0	0	-1.5	975.64
14	1	32	3	6	5	2	4	1	2	0	4	4	0	0	0	0	-1.5	639.641
14	1	33	1	3	5	6	4	2	4	0	5	5	0	0	0	0	-1.5	943.614
14	1	34	1	6	2	3	4	5	6	0	2	2	0	0	0	0	-1.5	1167.6
14	1	35	5	4	3	2	1	6	3	0	3	3	0	0	0	0	-1.5	847.626
14	1	36	2	5	6	1	3	4	1	0	4	4	0	0	0	0	-1.5	687.618
14	1	37	5	4	2	6	3	1	5	0	1	1	0	0	0	0	-1.5	799.549
14	1	38	1	3	2	5	6	4	2	0	3	3	0	0	0	0	-1.5	1711.61
14	1	39	1	3	2	5	6	4	4	0	6	2	1	0	1	0.5	-2	1327.58
14	1	40	5	4	2	1	6	3	6	0	5	5	0	1	0	0	-2	799.579
14	1	41	5	6	4	3	1	2	3	0	4	4	0	0	0	0	-2	591.584
14	1	42	4	5	1	2	3	6	1	0	3	2	1	0	0	0	-2	783.619
14	1	43	4	5	1	2	3	6	5	0	2	5	1	1	1	0.5	-2.5	2079.46
14	1	44	6	5	3	4	2	1	2	0	5	5	0	1	0	0	-2.5	847.575
14	1	45	6	3	4	2	1	5	4	0	3	3	0	0	0	0	-2.5	767.65
14	1	46	4	5	1	3	2	6	6	0	6	6	0	0	0	0	-2.5	783.61
14	1	47	6	2	3	1	4	5	3	0	3	3	0	0	0	0	-2.5	655.635
14	1	48	6	2	3	1	4	5	1	0	4	3	1	0	1	0.5	-3	1471.46
14	1	49	2	5	1	4	3	6	5	0	2	2	0	1	0	0	-3	863.599
14	1	50	6	1	2	4	5	3	2	0	3	3	0	0	0	0	-3	719.557
14	1	51	5	3	1	6	2	4	4	0	6	6	0	0	0	0	-3	847.653
14	1	52	1	6	2	5	3	4	6	0	2	2	0	0	0	0	-3	751.639
14	1	53	1	6	2	5	3	4	3	0	5	5	0	0	1	0.5	-2.5	1519.51
14	1	54	6	4	1	5	3	2	1	0	3	3	0	0	0	0	-2.5	703.648
14	1	55	4	2	1	3	6	5	5	0	6	6	0	0	0	0	-2.5	767.575
14	1	56	6	4	5	2	1	3	2	0	4	4	0	0	0	0	-2.5	719.55
14	1	57	4	1	3	6	2	5	4	0	1	1	0	0	0	0	-2.5	863.607
14	1	58	2	5	6	4	3	1	6	0	3	3	0	0	0	0	-2.5	719.511
14	1	59	6	2	4	5	1	3	3	0	6	6	0	0	0	0	-2.5	815.599
14	1	60	6	2	4	5	1	3	1	0	5	6	1	0	1	0.5	-3	1535.51
14	1	61	5	4	3	6	1	2	5	0	1	3	1	1	0	0	-3	687.599
14	1	62	4	5	2	1	3	6	2	0	3	3	0	1	0	0	-3	895.616
14	1	63	4	3	5	2	6	1	4	0	1	1	0	0	0	0	-3	991.563
14	1	64	4	3	5	2	6	1	6	0	5	2	1	0	1	0.5	-3.5	1743.52
14	1	65	5	2	6	1	4	3	3	0	6	6	0	1	0	0	-3.5	1119.52
14	1	66	1	2	5	4	3	6	1	0	1	1	0	0	0	0	-3.5	735.587
14	1	67	6	5	4	1	3	2	5	0	2	2	0	0	0	0	-3.5	911.641
14	1	68	2	1	5	4	6	3	2	0	1	1	0	0	0	0	-3.5	767.603
14	1	69	2	1	5	4	6	3	4	0	4	6	1	0	1	0.5	-4	1391.64
14	1	70	2	4	3	5	6	1	6	0	5	5	0	1	0	0	-4	1039.62
14	1	71	1	3	5	2	6	4	3	0	2	2	0	0	0	0	-4	927.624
14	1	72	3	6	4	5	2	1	1	0	6	6	0	0	0	0	-4	783.673
14	1	73	4	6	1	5	2	3	5	0	4	4	0	0	0	0	-4	975.529
14	1	74	4	6	1	5	2	3	2	0	5	6	1	0	1	0.5	-4.5	943.583
14	1	75	1	4	2	6	5	3	4	0	2	2	0	1	0	0	-4.5	847.564
14	1	76	4	5	1	3	2	6	6	0	6	6	0	0	0	0	-4.5	1343.54
14	1	77	4	5	1	3	2	6	3	0	4	4	0	0	1	0.5	-4	1391.51
14	1	78	3	4	5	2	6	1	1	0	6	6	0	0	0	0	-4	863.604
14	1	79	3	2	4	1	5	6	5	0	5	5	0	0	0	0	-4	879.609
14	1	80	1	5	2	6	4	3	2	0	3	3	0	0	0	0	-4	783.529
14	1	81	2	5	1	3	4	6	4	0	5	5	0	0	0	0	-4	895.555
14	1	82	2	5	1	3	4	6	6	0	6	4	1	0	1	0.5	-4.5	1263.54
14	1	83	6	3	4	1	5	2	3	0	2	2	0	1	0	0	-4.5	879.57
14	1	84	1	5	2	6	4	3	1	0	1	1	0	0	0	0	-4.5	719.677
14	1	85	5	1	3	6	2	4	5	0	1	1	0	0	0	0	-4.5	863.652
14	1	86	1	4	6	5	2	3	2	0	5	5	0	0	0	0	-4.5	1071.57
14	1	87	1	4	6	5	2	3	4	0	2	6	1	0	1	0.5	-5	1071.53
14	1	88	5	2	3	6	1	4	6	0	4	4	0	1	0	0	-5	975.653
14	1	89	3	5	6	4	1	2	3	0	1	1	0	0	0	0	-5	671.543
14	1	90	5	4	3	2	1	6	1	0	5	5	0	0	0	0	-5	783.62
14	1	91	6	1	2	3	4	5	5	0	6	6	0	0	0	0	-5	767.654
14	1	92	2	1	6	4	5	3	2	0	1	1	0	0	0	0	-5	655.658
14	1	93	2	1	6	4	5	3	4	0	4	6	1	0	1	0.5	-5.5	1375.61
14	1	94	4	1	3	2	6	5	6	0	5	5	0	1	0	0	-5.5	1007.66
14	1	95	3	4	2	6	1	5	3	0	1	1	0	0	0	0	-5.5	751.518
14	1	96	5	4	6	2	3	1	1	0	6	6	0	0	0	0	-5.5	863.555
14	1	97	6	3	2	5	4	1	5	0	4	4	0	0	0	0	-5.5	671.673
14	1	98	6	3	2	5	4	1	2	0	3	2	1	0	1	0.5	-6	1503.6
14	1	99	1	3	2	6	4	5	4	0	5	5	0	1	0	0	-6	895.596
14	1	100	1	2	4	6	3	5	6	0	4	4	0	0	0	0	-6	767.549
15	2	1	2	5	3	1	4	6	0	5	2	5	1	0	0	0	0	16392.7
15	2	2	4	1	5	3	6	2	0	2	6	6	0	1	0	0	0	4540.98
15	2	3	4	3	2	5	1	6	0	4	1	1	0	0	0	0	0	2397.16
15	2	4	5	1	4	3	6	2	0	6	5	5	0	0	0	0	0	1901.21
15	2	5	5	1	4	3	6	2	0	3	4	6	1	0	1	0.01	-0.01	21884.6
15	2	6	6	4	3	2	5	1	0	1	6	6	0	1	0	0	-0.01	3261.08
15	2	7	3	6	5	2	4	1	0	5	3	3	0	0	0	0	-0.01	5117.11
15	2	8	6	1	5	2	3	4	0	2	4	4	0	0	0	0	-0.01	5725.05
15	2	9	3	1	2	6	4	5	0	4	5	5	0	0	0	0	-0.01	1277.15
15	2	10	3	1	2	6	4	5	0	6	4	6	1	0	1	0.5	-0.51	5373.14
15	2	11	6	1	3	4	2	5	0	3	3	3	0	1	0	0	-0.51	4765.06
15	2	12	1	2	3	6	4	5	0	1	1	1	0	0	0	0	-0.51	3133.14
15	2	13	6	1	5	3	4	2	0	5	3	3	0	0	0	0	-0.51	1901.17
15	2	14	6	1	5	3	4	2	0	2	6	4	1	0	1	0.01	-0.52	5725.09
15	2	15	6	3	4	1	5	2	0	4	3	3	0	1	0	0	-0.52	2829.17
15	2	16	4	6	1	2	3	5	0	6	2	2	0	0	0	0	-0.52	1757.13
15	2	17	1	5	4	2	3	6	0	3	5	5	0	0	0	0	-0.52	2461.2
15	2	18	5	4	2	1	6	3	0	1	4	4	0	0	0	0	-0.52	1517.15
15	2	19	5	4	2	1	6	3	0	5	1	3	1	0	1	0.01	-0.53	3549.17
15	2	20	4	2	5	6	3	1	0	2	2	2	0	1	0	0	-0.53	2765.2
15	2	21	5	3	1	4	2	6	0	4	4	4	0	0	0	0	-0.53	1677.18
15	2	22	2	6	1	5	4	3	0	6	2	2	0	0	0	0	-0.53	2349.21
15	2	23	2	6	1	5	4	3	0	3	6	1	1	0	1	0.01	-0.54	2317.17
15	2	24	6	4	1	3	2	5	0	1	3	3	0	1	0	0	-0.54	2333.19
15	2	25	3	1	4	2	6	5	0	5	6	6	0	0	0	0	-0.54	3133.12
15	2	26	3	1	4	2	6	5	0	2	4	5	1	0	1	0.01	-0.55	3437.15
15	2	27	1	2	3	6	4	5	0	4	5	5	0	1	0	0	-0.55	1325.14
15	2	28	6	2	1	4	3	5	0	6	1	1	0	0	0	0	-0.55	2733.21
15	2	29	6	5	1	3	2	4	0	3	4	4	0	0	0	0	-0.55	2525.11
15	2	30	6	5	1	3	2	4	0	1	3	5	1	0	1	0.01	-0.56	3133.16
15	2	31	4	3	2	1	6	5	0	5	6	4	1	1	0	0	-0.56	2285.2
15	2	32	3	6	5	2	4	1	0	2	4	4	0	1	0	0	-0.56	2877.17
15	2	33	1	3	5	6	4	2	0	4	5	5	0	0	0	0	-0.56	1053.17
15	2	34	1	6	2	3	4	5	0	6	2	2	0	0	0	0	-0.56	2173.19
15	2	35	5	4	3	2	1	6	0	3	3	3	0	0	0	0	-0.56	1821.2
15	2	36	2	5	6	1	3	4	0	1	4	4	0	0	0	0	-0.56	1885.18
15	2	37	5	4	2	6	3	1	0	5	1	1	0	0	0	0	-0.56	3325.12
15	2	38	1	3	2	5	6	4	0	2	3	3	0	0	0	0	-0.56	3901.11
15	2	39	1	3	2	5	6	4	0	4	6	4	1	0	1	0.01	-0.57	3085.16
15	2	40	5	4	2	1	6	3	0	6	5	5	0	1	0	0	-0.57	6717.04
15	2	41	5	6	4	3	1	2	0	3	4	4	0	0	0	0	-0.57	957.2
15	2	42	4	5	1	2	3	6	0	1	3	4	1	0	0	0	-0.57	1869.2
15	2	43	4	5	1	2	3	6	0	5	2	3	1	1	1	0.01	-0.58	2109.19
15	2	44	6	5	3	4	2	1	0	2	5	5	0	1	0	0	-0.58	4237.15
15	2	45	6	3	4	2	1	5	0	4	3	3	0	0	0	0	-0.58	2157.14
15	2	46	4	5	1	3	2	6	0	6	6	6	0	0	0	0	-0.58	2365.14
15	2	47	6	2	3	1	4	5	0	3	3	3	0	0	0	0	-0.58	1405.22
15	2	48	6	2	3	1	4	5	0	1	4	2	1	0	1	0.01	-0.59	1693.14
15	2	49	2	5	1	4	3	6	0	5	2	2	0	1	0	0	-0.59	1933.18
15	2	50	6	1	2	4	5	3	0	2	3	3	0	0	0	0	-0.59	1165.19
15	2	51	5	3	1	6	2	4	0	4	6	6	0	0	0	0	-0.59	1581.21
15	2	52	1	6	2	5	3	4	0	6	2	2	0	0	0	0	-0.59	1549.22
15	2	53	1	6	2	5	3	4	0	3	5	1	1	0	1	0.01	-0.6	1693.2
15	2	54	6	4	1	5	3	2	0	1	3	3	0	1	0	0	-0.6	1965.23
15	2	55	4	2	1	3	6	5	0	5	6	6	0	0	0	0	-0.6	2205.17
15	2	56	6	4	5	2	1	3	0	2	4	4	0	0	0	0	-0.6	2301.17
15	2	57	4	1	3	6	2	5	0	4	1	1	0	0	0	0	-0.6	3293.16
15	2	58	2	5	6	4	3	1	0	6	3	3	0	0	0	0	-0.6	2173.17
15	2	59	6	2	4	5	1	3	0	3	6	6	0	0	0	0	-0.6	2877.15
15	2	60	6	2	4	5	1	3	0	1	5	4	1	0	1	0.5	-1.1	1341.17
15	2	61	5	4	3	6	1	2	0	5	1	1	0	1	0	0	-1.1	3437.14
15	2	62	4	5	2	1	3	6	0	2	3	3	0	0	0	0	-1.1	1869.18
15	2	63	4	3	5	2	6	1	0	4	1	1	0	0	0	0	-1.1	1437.23
15	2	64	4	3	5	2	6	1	0	6	5	3	1	0	1	0.5	-1.6	1725.15
15	2	65	5	2	6	1	4	3	0	3	6	6	0	1	0	0	-1.6	3085.18
15	2	66	1	2	5	4	3	6	0	1	1	1	0	0	0	0	-1.6	3485.15
15	2	67	6	5	4	1	3	2	0	5	2	2	0	0	0	0	-1.6	1357.2
15	2	68	2	1	5	4	6	3	0	2	1	1	0	0	0	0	-1.6	4493.1
15	2	69	2	1	5	4	6	3	0	4	4	3	1	0	1	0.01	-1.61	1805.22
15	2	70	2	4	3	5	6	1	0	6	5	5	0	1	0	0	-1.61	2813.19
15	2	71	1	3	5	2	6	4	0	3	2	2	0	0	0	0	-1.61	1965.17
15	2	72	3	6	4	5	2	1	0	1	6	6	0	0	0	0	-1.61	2957.18
15	2	73	4	6	1	5	2	3	0	5	4	4	0	0	0	0	-1.61	2557.17
15	2	74	4	6	1	5	2	3	0	2	5	6	1	0	1	0.01	-1.62	5261.05
15	2	75	1	4	2	6	5	3	0	4	2	2	0	1	0	0	-1.62	2125.19
15	2	76	4	5	1	3	2	6	0	6	6	6	0	0	0	0	-1.62	5005.1
15	2	77	4	5	1	3	2	6	0	3	4	4	0	0	1	0.01	-1.61	8557
15	2	78	3	4	5	2	6	1	0	1	6	6	0	0	0	0	-1.61	3965.15
15	2	79	3	2	4	1	5	6	0	5	5	5	0	0	0	0	-1.61	1469.16
15	2	80	1	5	2	6	4	3	0	2	3	3	0	0	0	0	-1.61	5181.09
15	2	81	2	5	1	3	4	6	0	4	5	5	0	0	0	0	-1.61	2013.16
15	2	82	2	5	1	3	4	6	0	6	6	6	0	0	1	0.01	-1.6	2061.19
15	2	83	6	3	4	1	5	2	0	3	2	2	0	0	0	0	-1.6	1597.25
15	2	84	1	5	2	6	4	3	0	1	1	1	0	0	0	0	-1.6	1357.17
15	2	85	5	1	3	6	2	4	0	5	1	1	0	0	0	0	-1.6	2733.19
15	2	86	1	4	6	5	2	3	0	2	5	5	0	0	0	0	-1.6	3597.11
15	2	87	1	4	6	5	2	3	0	4	2	6	1	0	1	0.01	-1.61	1917.2
15	2	88	5	2	3	6	1	4	0	6	4	4	0	1	0	0	-1.61	1341.26
15	2	89	3	5	6	4	1	2	0	3	1	1	0	0	0	0	-1.61	1661.17
15	2	90	5	4	3	2	1	6	0	1	5	5	0	0	0	0	-1.61	2381.17
15	2	91	6	1	2	3	4	5	0	5	6	6	0	0	0	0	-1.61	2541.15
15	2	92	2	1	6	4	5	3	0	2	1	1	0	0	0	0	-1.61	3805.13
15	2	93	2	1	6	4	5	3	0	4	4	1	1	0	1	0.01	-1.62	1133.19
15	2	94	4	1	3	2	6	5	0	6	5	5	0	1	0	0	-1.62	1709.21
15	2	95	3	4	2	6	1	5	0	3	1	1	0	0	0	0	-1.62	1421.11
15	2	96	5	4	6	2	3	1	0	1	6	6	0	0	0	0	-1.62	2893.14
15	2	97	6	3	2	5	4	1	0	5	4	4	0	0	0	0	-1.62	1309.23
15	2	98	6	3	2	5	4	1	0	2	3	4	1	0	1	0.01	-1.63	4413.09
15	2	99	1	3	2	6	4	5	0	4	5	5	0	1	0	0	-1.63	1565.23
15	2	100	1	2	4	6	3	5	0	6	4	4	0	0	0	0	-1.63	1613.18
16	2	1	4	1	5	2	6	3	0	2	4	2	1	0	0	0	0	1785.24
16	2	2	5	2	3	1	6	4	0	5	1	1	0	1	0	0	0	3421.02
16	2	3	5	3	1	6	4	2	0	3	2	3	1	0	0	0	0	1677.25
16	2	4	2	5	4	1	6	3	0	4	3	3	0	1	0	0	0	1885.18
16	2	5	2	5	4	1	6	3	0	1	4	4	0	0	1	0.01	0.01	4525.08
16	2	6	5	3	6	2	4	1	0	5	1	1	0	0	0	0	0.01	1053.18
16	2	7	1	4	6	5	2	3	0	6	3	3	0	0	0	0	0.01	1469.22
16	2	8	4	2	3	5	6	1	0	2	2	2	0	0	0	0	0.01	1757.23
16	2	9	3	4	1	6	2	5	0	5	6	6	0	0	0	0	0.01	957.209
16	2	10	3	4	1	6	2	5	0	3	1	4	1	0	1	0.01	0	3757.17
16	2	11	5	2	1	4	6	3	0	4	4	4	0	1	0	0	0	1069.23
16	2	12	2	3	1	6	5	4	0	1	3	3	0	0	0	0	0	1533.22
16	2	13	6	2	5	1	3	4	0	5	3	3	0	0	0	0	0	1309.2
16	2	14	6	2	5	1	3	4	0	6	1	1	0	0	1	0.01	0.01	3245.18
16	2	15	4	2	6	5	1	3	0	2	2	1	1	0	0	0	0.01	1069.22
16	2	16	2	4	5	3	6	1	0	5	3	3	0	1	0	0	0.01	1133.24
16	2	17	1	6	2	5	3	4	0	3	5	5	0	0	0	0	0.01	941.181
16	2	18	6	1	2	4	5	3	0	4	4	4	0	0	0	0	0.01	1117.24
16	2	19	6	1	2	4	5	3	0	1	2	6	1	0	1	0.01	0	2493.2
16	2	20	6	4	5	2	1	3	0	5	3	3	0	1	0	0	0	1085.2
16	2	21	6	2	1	5	3	4	0	6	1	1	0	0	0	0	0	1453.23
16	2	22	1	5	4	2	3	6	0	2	4	4	0	0	0	0	0	957.259
16	2	23	1	5	4	2	3	6	0	5	2	6	1	0	1	0.01	-0.01	2173.2
16	2	24	1	2	3	6	5	4	0	3	3	3	0	1	0	0	-0.01	957.256
16	2	25	1	6	2	5	4	3	0	4	5	5	0	0	0	0	-0.01	973.177
16	2	26	1	6	2	5	4	3	0	1	1	1	0	0	1	0.01	0	2829.22
16	2	27	1	3	2	4	6	5	0	5	6	6	0	0	0	0	0	1517.18
16	2	28	3	4	5	6	1	2	0	6	4	1	1	0	0	0	0	1405.26
16	2	29	5	2	4	1	6	3	0	2	2	2	0	1	0	0	0	1421.23
16	2	30	5	2	4	1	6	3	0	5	1	6	1	0	1	0.01	-0.01	2045.2
16	2	31	2	6	3	4	1	5	0	3	3	3	0	1	0	0	-0.01	1661.27
16	2	32	5	3	6	2	1	4	0	4	6	6	0	0	0	0	-0.01	749.247
16	2	33	3	2	5	1	6	4	0	1	4	4	0	0	0	0	-0.01	1789.24
16	2	34	4	6	1	3	5	2	0	5	5	5	0	0	0	0	-0.01	1325.21
16	2	35	3	4	6	1	5	2	0	6	3	3	0	0	0	0	-0.01	1421.23
16	2	36	2	6	3	5	1	4	0	2	1	1	0	0	0	0	-0.01	909.245
16	2	37	1	6	3	4	2	5	0	5	6	6	0	0	0	0	-0.01	1213.18
16	2	38	2	6	4	5	3	1	0	3	5	5	0	0	0	0	-0.01	749.238
16	2	39	2	6	4	5	3	1	0	4	3	2	1	0	1	0.01	-0.02	2253.16
16	2	40	6	2	4	3	1	5	0	1	5	5	0	1	0	0	-0.02	925.248
16	2	41	4	1	3	6	2	5	0	5	6	6	0	0	0	0	-0.02	1357.18
16	2	42	6	3	2	5	1	4	0	6	1	1	0	0	0	0	-0.02	1725.19
16	2	43	6	3	2	5	1	4	0	2	3	3	0	0	1	0.01	-0.01	1773.18
16	2	44	5	4	6	1	3	2	0	5	1	1	0	0	0	0	-0.01	1069.26
16	2	45	5	4	6	2	1	3	0	3	6	6	0	0	0	0	-0.01	701.213
16	2	46	2	4	3	5	6	1	0	4	2	2	0	0	0	0	-0.01	1021.23
16	2	47	6	4	5	2	1	3	0	1	5	5	0	0	0	0	-0.01	909.241
16	2	48	6	4	5	2	1	3	0	5	3	4	1	0	1	0.01	-0.02	4925.07
16	2	49	6	3	1	4	2	5	0	6	1	1	0	1	0	0	-0.02	925.23
16	2	50	6	2	5	3	4	1	0	2	2	2	0	0	0	0	-0.02	957.231
16	2	51	6	3	2	5	4	1	0	5	4	4	0	0	0	0	-0.02	925.216
16	2	52	1	6	3	5	2	4	0	3	3	3	0	0	0	0	-0.02	1421.21
16	2	53	1	6	3	5	2	4	0	4	6	5	1	0	1	0.01	-0.03	2365.19
16	2	54	3	1	2	5	6	4	0	1	2	2	0	1	0	0	-0.03	1005.25
16	2	55	4	2	3	5	6	1	0	5	4	4	0	0	0	0	-0.03	1261.21
16	2	56	5	2	6	3	1	4	0	6	3	3	0	0	0	0	-0.03	1277.19
16	2	57	2	4	6	1	3	5	0	2	1	1	0	0	0	0	-0.03	2125.24
16	2	58	1	3	6	2	5	4	0	5	5	5	0	0	0	0	-0.03	749.212
16	2	59	6	4	1	3	5	2	0	3	4	4	0	0	0	0	-0.03	1549.24
16	2	60	1	4	2	6	3	5	0	4	2	3	1	0	1	0.01	-0.04	2157.18
16	2	61	1	5	3	4	6	2	0	1	1	1	0	1	0	0	-0.04	1149.21
16	2	62	6	1	3	4	2	5	0	5	6	6	0	0	0	0	-0.04	1133.27
16	2	63	5	2	4	1	3	6	0	6	6	6	0	0	0	0	-0.04	1501.14
16	2	64	5	2	4	1	3	6	0	2	2	1	1	0	1	0.01	-0.05	1133.19
16	2	65	5	1	6	2	4	3	0	5	1	1	0	1	0	0	-0.05	813.259
16	2	66	1	4	2	5	6	3	0	3	6	6	0	0	0	0	-0.05	893.244
16	2	67	3	6	2	5	4	1	0	4	5	5	0	0	0	0	-0.05	861.245
16	2	68	6	5	4	3	2	1	0	1	6	6	0	0	0	0	-0.05	1901.21
16	2	69	6	5	4	3	2	1	0	5	2	6	1	0	1	0.01	-0.06	2269.15
16	2	70	6	1	5	3	2	4	0	6	1	1	0	1	0	0	-0.06	1645.2
16	2	71	5	3	4	2	6	1	0	2	4	4	0	0	0	0	-0.06	2077.2
16	2	72	2	4	6	1	5	3	0	5	5	5	0	0	0	0	-0.06	1773.14
16	2	73	5	3	4	2	1	6	0	3	2	2	0	0	0	0	-0.06	973.271
16	2	74	5	3	4	2	1	6	0	4	3	1	1	0	1	0.01	-0.07	3885.14
16	2	75	5	2	3	1	4	6	0	1	4	4	0	1	0	0	-0.07	1165.25
16	2	76	6	5	3	4	2	1	0	5	2	2	0	0	0	0	-0.07	909.184
16	2	77	6	5	3	4	2	1	0	6	1	1	0	0	1	0.01	-0.06	2077.14
16	2	78	4	1	2	3	5	6	0	2	3	3	0	0	0	0	-0.06	1213.23
16	2	79	1	4	6	2	3	5	0	5	6	6	0	0	0	0	-0.06	941.256
16	2	80	4	1	5	2	3	6	0	3	5	5	0	0	0	0	-0.06	1197.18
16	2	81	4	1	2	5	3	6	0	4	1	2	1	0	0	0	-0.06	2205.23
16	2	82	4	1	2	5	3	6	0	1	2	1	1	1	1	0.01	-0.07	1789.16
16	2	83	5	4	6	3	2	1	0	5	1	1	0	1	0	0	-0.07	1037.29
16	2	84	4	1	5	2	6	3	0	6	5	5	0	0	0	0	-0.07	1101.19
16	2	85	4	1	2	6	3	5	0	2	3	3	0	0	0	0	-0.07	2621.16
16	2	86	6	2	4	3	1	5	0	5	6	6	0	0	0	0	-0.07	1309.22
16	2	87	6	2	4	3	1	5	0	3	4	6	1	0	1	0.01	-0.08	2141.21
16	2	88	2	3	6	5	4	1	0	4	5	5	0	1	0	0	-0.08	893.254
16	2	89	4	1	3	2	6	5	0	1	2	2	0	0	0	0	-0.08	1405.17
16	2	90	5	1	2	4	3	6	0	5	1	1	0	0	0	0	-0.08	2029.16
16	2	91	2	4	3	5	1	6	0	6	6	6	0	0	0	0	-0.08	1405.27
16	2	92	2	4	1	6	5	3	0	2	1	5	1	0	0	0	-0.08	1917.2
16	2	93	2	4	1	6	5	3	0	5	5	5	0	1	1	0.01	-0.07	2541.11
16	2	94	1	3	4	5	6	2	0	3	2	2	0	0	0	0	-0.07	941.307
16	2	95	5	2	1	4	3	6	0	4	4	4	0	0	0	0	-0.07	1293.11
16	2	96	6	2	1	4	3	5	0	1	3	3	0	0	0	0	-0.07	1389.21
16	2	97	4	5	1	2	3	6	0	5	2	2	0	0	0	0	-0.07	1357.23
16	2	98	4	5	1	2	3	6	0	6	6	4	1	0	1	0.01	-0.08	2349.19
16	2	99	1	2	6	4	5	3	0	2	2	2	0	1	0	0	-0.08	1149.24
16	2	100	6	1	2	3	5	4	0	5	5	5	0	0	0	0	-0.08	877.18
17	1	1	4	1	5	2	6	3	2	0	4	4	0	0	0	0	0	807.617
17	1	2	5	2	3	1	6	4	5	0	1	1	0	0	0	0	0	1263.47
17	1	3	5	3	1	6	4	2	3	0	2	2	0	0	0	0	0	671.588
17	1	4	2	5	4	1	6	3	4	0	3	3	0	0	0	0	0	655.557
17	1	5	2	5	4	1	6	3	1	0	4	4	0	0	1	0.5	0.5	1583.55
17	1	6	5	3	6	2	4	1	5	0	1	1	0	0	0	0	0.5	863.546
17	1	7	1	4	6	5	2	3	6	0	3	3	0	0	0	0	0.5	911.516
17	1	8	4	2	3	5	6	1	2	0	2	2	0	0	0	0	0.5	687.594
17	1	9	3	4	1	6	2	5	5	0	6	6	0	0	0	0	0.5	831.654
17	1	10	3	4	1	6	2	5	3	0	1	4	1	0	1	0.5	0	2159.59
17	1	11	5	2	1	4	6	3	4	0	4	4	0	1	0	0	0	735.57
17	1	12	2	3	1	6	5	4	1	0	3	3	0	0	0	0	0	671.606
17	1	13	6	2	5	1	3	4	5	0	3	3	0	0	0	0	0	879.549
17	1	14	6	2	5	1	3	4	6	0	1	4	1	0	1	0.5	-0.5	2063.6
17	1	15	4	2	6	5	1	3	2	0	2	2	0	1	0	0	-0.5	783.634
17	1	16	2	4	5	3	6	1	5	0	3	3	0	0	0	0	-0.5	703.666
17	1	17	1	6	2	5	3	4	3	0	5	5	0	0	0	0	-0.5	975.621
17	1	18	6	1	2	4	5	3	4	0	4	4	0	0	0	0	-0.5	671.628
17	1	19	6	1	2	4	5	3	1	0	2	1	1	0	1	0.5	-1	3599.52
17	1	20	6	4	5	2	1	3	5	0	3	3	0	1	0	0	-1	703.643
17	1	21	6	2	1	5	3	4	6	0	1	1	0	0	0	0	-1	1007.61
17	1	22	1	5	4	2	3	6	2	0	4	4	0	0	0	0	-1	783.518
17	1	23	1	5	4	2	3	6	5	0	2	6	1	0	1	0.5	-1.5	1407.67
17	1	24	1	2	3	6	5	4	3	0	3	3	0	1	0	0	-1.5	767.524
17	1	25	1	6	2	5	4	3	4	0	5	5	0	0	0	0	-1.5	895.538
17	1	26	1	6	2	5	4	3	1	0	1	4	1	0	1	0.5	-2	3679.46
17	1	27	1	3	2	4	6	5	5	0	6	6	0	1	0	0	-2	943.626
17	1	28	3	4	5	6	1	2	6	0	4	4	0	0	0	0	-2	783.692
17	1	29	5	2	4	1	6	3	2	0	2	2	0	0	0	0	-2	703.525
17	1	30	5	2	4	1	6	3	5	0	1	3	1	0	1	0.5	-2.5	2127.56
17	1	31	2	6	3	4	1	5	3	0	3	3	0	1	0	0	-2.5	623.626
17	1	32	5	3	6	2	1	4	4	0	6	6	0	0	0	0	-2.5	735.584
17	1	33	3	2	5	1	6	4	1	0	4	4	0	0	0	0	-2.5	527.581
17	1	34	4	6	1	3	5	2	5	0	5	5	0	0	0	0	-2.5	767.683
17	1	35	3	4	6	1	5	2	6	0	3	3	0	0	0	0	-2.5	639.634
17	1	36	2	6	3	5	1	4	2	0	1	1	0	0	0	0	-2.5	479.548
17	1	37	1	6	3	4	2	5	5	0	6	6	0	0	0	0	-2.5	735.574
17	1	38	2	6	4	5	3	1	3	0	5	5	0	0	0	0	-2.5	687.672
17	1	39	2	6	4	5	3	1	4	0	3	2	1	0	1	0.5	-3	4415.47
17	1	40	6	2	4	3	1	5	1	0	5	5	0	1	0	0	-3	863.633
17	1	41	4	1	3	6	2	5	5	0	6	6	0	0	0	0	-3	927.645
17	1	42	6	3	2	5	1	4	6	0	1	1	0	0	0	0	-3	687.515
17	1	43	6	3	2	5	1	4	2	0	3	2	1	0	1	0.5	-3.5	1519.52
17	1	44	5	4	6	1	3	2	5	0	1	1	0	1	0	0	-3.5	607.608
17	1	45	5	4	6	2	1	3	3	0	6	6	0	0	0	0	-3.5	495.616
17	1	46	2	4	3	5	6	1	4	0	2	2	0	0	0	0	-3.5	735.597
17	1	47	6	4	5	2	1	3	1	0	5	5	0	0	0	0	-3.5	559.588
17	1	48	6	4	5	2	1	3	5	0	3	3	0	0	1	0.5	-3	1503.57
17	1	49	6	3	1	4	2	5	6	0	1	1	0	0	0	0	-3	639.592
17	1	50	6	2	5	3	4	1	2	0	2	2	0	0	0	0	-3	783.653
17	1	51	6	3	2	5	4	1	5	0	4	4	0	0	0	0	-3	1263.54
17	1	52	1	6	3	5	2	4	3	0	3	3	0	0	0	0	-3	943.55
17	1	53	1	6	3	5	2	4	4	0	6	1	1	0	1	0.5	-3.5	1103.57
17	1	54	3	1	2	5	6	4	1	0	2	2	0	1	0	0	-3.5	847.57
17	1	55	4	2	3	5	6	1	5	0	4	4	0	0	0	0	-3.5	1519.52
17	1	56	5	2	6	3	1	4	6	0	3	3	0	0	0	0	-3.5	975.663
17	1	57	2	4	6	1	3	5	2	0	1	1	0	0	0	0	-3.5	735.65
17	1	58	1	3	6	2	5	4	5	0	5	5	0	0	0	0	-3.5	799.594
17	1	59	6	4	1	3	5	2	3	0	4	4	0	0	0	0	-3.5	607.622
17	1	60	1	4	2	6	3	5	4	0	2	2	0	0	1	0.5	-3	2255.53
17	1	61	1	5	3	4	6	2	1	0	1	1	0	0	0	0	-3	911.536
17	1	62	6	1	3	4	2	5	5	0	6	6	0	0	0	0	-3	943.55
17	1	63	5	2	4	1	3	6	6	0	6	6	0	0	0	0	-3	2239.52
17	1	64	5	2	4	1	3	6	2	0	2	2	0	0	1	0.5	-2.5	5007.45
17	1	65	5	1	6	2	4	3	5	0	1	1	0	0	0	0	-2.5	1135.59
17	1	66	1	4	2	5	6	3	3	0	6	6	0	0	0	0	-2.5	719.586
17	1	67	3	6	2	5	4	1	4	0	5	5	0	0	0	0	-2.5	975.525
17	1	68	6	5	4	3	2	1	1	0	6	6	0	0	0	0	-2.5	863.587
17	1	69	6	5	4	3	2	1	5	0	2	1	1	0	1	0.5	-3	6399.4
17	1	70	6	1	5	3	2	4	6	0	1	1	0	1	0	0	-3	1247.58
17	1	71	5	3	4	2	6	1	2	0	4	4	0	0	0	0	-3	1439.46
17	1	72	2	4	6	1	5	3	5	0	5	5	0	0	0	0	-3	1935.52
17	1	73	5	3	4	2	1	6	3	0	2	6	1	0	0	0	-3	543.54
17	1	74	5	3	4	2	1	6	4	0	3	3	0	1	1	0.5	-2.5	1135.67
17	1	75	5	2	3	1	4	6	1	0	4	4	0	0	0	0	-2.5	1199.62
17	1	76	6	5	3	4	2	1	5	0	2	2	0	0	0	0	-2.5	1439.48
17	1	77	6	5	3	4	2	1	6	0	1	3	1	0	1	0.5	-3	1311.58
17	1	78	4	1	2	3	5	6	2	0	3	3	0	1	0	0	-3	943.602
17	1	79	1	4	6	2	3	5	5	0	6	6	0	0	0	0	-3	671.52
17	1	80	4	1	5	2	3	6	3	0	5	5	0	0	0	0	-3	975.581
17	1	81	4	1	2	5	3	6	4	0	1	1	0	0	0	0	-3	911.586
17	1	82	4	1	2	5	3	6	1	0	2	2	0	0	1	0.5	-2.5	1535.56
17	1	83	5	4	6	3	2	1	5	0	1	1	0	0	0	0	-2.5	847.577
17	1	84	4	1	5	2	6	3	6	0	5	5	0	0	0	0	-2.5	815.639
17	1	85	4	1	2	6	3	5	2	0	3	3	0	0	0	0	-2.5	2031.51
17	1	86	6	2	4	3	1	5	5	0	6	6	0	0	0	0	-2.5	1279.48
17	1	87	6	2	4	3	1	5	3	0	4	6	1	0	1	0.5	-3	3087.47
17	1	88	2	3	6	5	4	1	4	0	5	5	0	1	0	0	-3	799.579
17	1	89	4	1	3	2	6	5	1	0	2	2	0	0	0	0	-3	2751.49
17	1	90	5	1	2	4	3	6	5	0	1	1	0	0	0	0	-3	815.598
17	1	91	2	4	3	5	1	6	6	0	6	6	0	0	0	0	-3	911.532
17	1	92	2	4	1	6	5	3	2	0	1	1	0	0	0	0	-3	1103.55
17	1	93	2	4	1	6	5	3	5	0	5	5	0	0	1	0.5	-2.5	3135.5
17	1	94	1	3	4	5	6	2	3	0	2	2	0	0	0	0	-2.5	847.686
17	1	95	5	2	1	4	3	6	4	0	4	4	0	0	0	0	-2.5	1007.56
17	1	96	6	2	1	4	3	5	1	0	3	3	0	0	0	0	-2.5	847.584
17	1	97	4	5	1	2	3	6	5	0	2	2	0	0	0	0	-2.5	1087.56
17	1	98	4	5	1	2	3	6	6	0	6	5	1	0	1	0.5	-3	1455.53
17	1	99	1	2	6	4	5	3	2	0	2	2	0	1	0	0	-3	1471.54
17	1	100	6	1	2	3	5	4	5	0	5	1	1	0	0	0	-3	2687.47
18	1	1	2	5	3	1	4	6	5	0	2	2	0	1	0	0	0	887.246
18	1	2	4	1	5	3	6	2	2	0	6	6	0	0	0	0	0	1119.42
18	1	3	4	3	2	5	1	6	4	0	1	1	0	0	0	0	0	1359.39
18	1	4	5	1	4	3	6	2	6	0	5	5	0	0	0	0	0	1215.5
18	1	5	5	1	4	3	6	2	3	0	4	5	1	0	1	0.01	-0.01	57949.6
18	1	6	6	4	3	2	5	1	1	0	6	6	0	1	0	0	-0.01	3871.34
18	1	7	3	6	5	2	4	1	5	0	3	3	0	0	0	0	-0.01	1871.41
18	1	8	6	1	5	2	3	4	2	0	4	6	1	0	0	0	-0.01	3151.39
18	1	9	3	1	2	6	4	5	4	0	5	5	0	1	0	0	-0.01	2511.33
18	1	10	3	1	2	6	4	5	6	0	4	2	1	0	1	0.01	-0.02	32286.4
18	1	11	6	1	3	4	2	5	3	0	3	3	0	1	0	0	-0.02	2095.37
18	1	12	1	2	3	6	4	5	1	0	1	1	0	0	0	0	-0.02	975.438
18	1	13	6	1	5	3	4	2	5	0	3	3	0	0	0	0	-0.02	1055.54
18	1	14	6	1	5	3	4	2	2	0	6	1	1	0	1	0.5	-0.52	2335.39
18	1	15	6	3	4	1	5	2	4	0	3	3	0	1	0	0	-0.52	1471.39
18	1	16	4	6	1	2	3	5	6	0	2	2	0	0	0	0	-0.52	783.458
18	1	17	1	5	4	2	3	6	3	0	5	5	0	0	0	0	-0.52	1279.5
18	1	18	5	4	2	1	6	3	1	0	4	4	0	0	0	0	-0.52	2143.34
18	1	19	5	4	2	1	6	3	5	0	1	1	0	0	1	0.01	-0.51	14543
18	1	20	4	2	5	6	3	1	2	0	2	2	0	0	0	0	-0.51	2047.45
18	1	21	5	3	1	4	2	6	4	0	4	4	0	0	0	0	-0.51	1215.4
18	1	22	2	6	1	5	4	3	6	0	2	2	0	0	0	0	-0.51	2047.45
18	1	23	2	6	1	5	4	3	3	0	6	4	1	0	1	0.01	-0.52	19182.9
18	1	24	6	4	1	3	2	5	1	0	3	3	0	1	0	0	-0.52	1247.4
18	1	25	3	1	4	2	6	5	5	0	6	6	0	0	0	0	-0.52	1439.42
18	1	26	3	1	4	2	6	5	2	0	4	4	0	0	1	0.01	-0.51	10239.2
18	1	27	1	2	3	6	4	5	4	0	5	5	0	0	0	0	-0.51	2895.43
18	1	28	6	2	1	4	3	5	6	0	1	1	0	0	0	0	-0.51	1023.36
18	1	29	6	5	1	3	2	4	3	0	4	4	0	0	0	0	-0.51	1119.48
18	1	30	6	5	1	3	2	4	1	0	3	6	1	0	1	0.01	-0.52	11295.1
18	1	31	4	3	2	1	6	5	5	0	6	6	0	1	0	0	-0.52	1023.45
18	1	32	3	6	5	2	4	1	2	0	4	4	0	0	0	0	-0.52	1727.36
18	1	33	1	3	5	6	4	2	4	0	5	5	0	0	0	0	-0.52	1567.49
18	1	34	1	6	2	3	4	5	6	0	2	2	0	0	0	0	-0.52	1151.4
18	1	35	5	4	3	2	1	6	3	0	3	3	0	0	0	0	-0.52	1039.45
18	1	36	2	5	6	1	3	4	1	0	4	4	0	0	0	0	-0.52	1055.47
18	1	37	5	4	2	6	3	1	5	0	1	1	0	0	0	0	-0.52	1151.44
18	1	38	1	3	2	5	6	4	2	0	3	3	0	0	0	0	-0.52	1279.47
18	1	39	1	3	2	5	6	4	4	0	6	5	1	0	1	0.5	-1.02	16894.9
18	1	40	5	4	2	1	6	3	6	0	5	5	0	1	0	0	-1.02	1103.42
18	1	41	5	6	4	3	1	2	3	0	4	4	0	0	0	0	-1.02	1215.45
18	1	42	4	5	1	2	3	6	1	0	3	3	0	0	0	0	-1.02	1087.42
18	1	43	4	5	1	2	3	6	5	0	2	2	0	0	1	0.01	-1.01	56493.7
18	1	44	6	5	3	4	2	1	2	0	5	5	0	0	0	0	-1.01	1231.4
18	1	45	6	3	4	2	1	5	4	0	3	3	0	0	0	0	-1.01	1519.47
18	1	46	4	5	1	3	2	6	6	0	6	6	0	0	0	0	-1.01	1103.48
18	1	47	6	2	3	1	4	5	3	0	3	3	0	0	0	0	-1.01	1167.44
18	1	48	6	2	3	1	4	5	1	0	4	2	1	0	1	0.01	-1.02	41486.1
18	1	49	2	5	1	4	3	6	5	0	2	2	0	1	0	0	-1.02	799.428
18	1	50	6	1	2	4	5	3	2	0	3	3	0	0	0	0	-1.02	991.451
18	1	51	5	3	1	6	2	4	4	0	6	6	0	0	0	0	-1.02	959.436
18	1	52	1	6	2	5	3	4	6	0	2	2	0	0	0	0	-1.02	911.47
18	1	53	1	6	2	5	3	4	3	0	5	5	0	0	1	0.01	-1.01	9983.14
18	1	54	6	4	1	5	3	2	1	0	3	3	0	0	0	0	-1.01	1007.46
18	1	55	4	2	1	3	6	5	5	0	6	6	0	0	0	0	-1.01	895.521
18	1	56	6	4	5	2	1	3	2	0	4	4	0	0	0	0	-1.01	847.46
18	1	57	4	1	3	6	2	5	4	0	1	1	0	0	0	0	-1.01	751.424
18	1	58	2	5	6	4	3	1	6	0	3	3	0	0	0	0	-1.01	783.406
18	1	59	6	2	4	5	1	3	3	0	6	6	0	0	0	0	-1.01	687.49
18	1	60	6	2	4	5	1	3	1	0	5	4	1	0	1	0.5	-1.51	1967.43
18	1	61	5	4	3	6	1	2	5	0	1	1	0	1	0	0	-1.51	735.481
18	1	62	4	5	2	1	3	6	2	0	3	3	0	0	0	0	-1.51	831.501
18	1	63	4	3	5	2	6	1	4	0	1	1	0	0	0	0	-1.51	847.392
18	1	64	4	3	5	2	6	1	6	0	5	3	1	0	1	0.5	-2.01	3743.44
18	1	65	5	2	6	1	4	3	3	0	6	6	0	1	0	0	-2.01	703.41
18	1	66	1	2	5	4	3	6	1	0	1	1	0	0	0	0	-2.01	655.422
18	1	67	6	5	4	1	3	2	5	0	2	2	0	0	0	0	-2.01	639.473
18	1	68	2	1	5	4	6	3	2	0	1	1	0	0	0	0	-2.01	639.478
18	1	69	2	1	5	4	6	3	4	0	4	3	1	0	1	0.01	-2.02	11247.2
18	1	70	2	4	3	5	6	1	6	0	5	5	0	1	0	0	-2.02	895.488
18	1	71	1	3	5	2	6	4	3	0	2	2	0	0	0	0	-2.02	719.479
18	1	72	3	6	4	5	2	1	1	0	6	6	0	0	0	0	-2.02	751.49
18	1	73	4	6	1	5	2	3	5	0	4	4	0	0	0	0	-2.02	863.475
18	1	74	4	6	1	5	2	3	2	0	5	5	0	0	1	0.01	-2.01	19774.8
18	1	75	1	4	2	6	5	3	4	0	2	2	0	0	0	0	-2.01	815.485
18	1	76	4	5	1	3	2	6	6	0	6	6	0	0	0	0	-2.01	927.442
18	1	77	4	5	1	3	2	6	3	0	4	2	1	0	1	0.5	-2.51	3999.3
18	1	78	3	4	5	2	6	1	1	0	6	6	0	1	0	0	-2.51	751.491
18	1	79	3	2	4	1	5	6	5	0	5	5	0	0	0	0	-2.51	751.446
18	1	80	1	5	2	6	4	3	2	0	3	3	0	0	0	0	-2.51	1343.46
18	1	81	2	5	1	3	4	6	4	0	5	5	0	0	0	0	-2.51	927.43
18	1	82	2	5	1	3	4	6	6	0	6	4	1	0	1	0.5	-3.01	6911.25
18	1	83	6	3	4	1	5	2	3	0	2	2	0	1	0	0	-3.01	687.375
18	1	84	1	5	2	6	4	3	1	0	1	1	0	0	0	0	-3.01	1455.43
18	1	85	5	1	3	6	2	4	5	0	1	1	0	0	0	0	-3.01	1919.46
18	1	86	1	4	6	5	2	3	2	0	5	5	0	0	0	0	-3.01	1199.46
18	1	87	1	4	6	5	2	3	4	0	2	2	0	0	1	0.01	-3	19390.9
18	1	88	5	2	3	6	1	4	6	0	4	4	0	0	0	0	-3	1167.45
18	1	89	3	5	6	4	1	2	3	0	1	1	0	0	0	0	-3	751.465
18	1	90	5	4	3	2	1	6	1	0	5	5	0	0	0	0	-3	703.434
18	1	91	6	1	2	3	4	5	5	0	6	6	0	0	0	0	-3	719.441
18	1	92	2	1	6	4	5	3	2	0	1	1	0	0	0	0	-3	735.433
18	1	93	2	1	6	4	5	3	4	0	4	3	1	0	1	0.01	-3.01	7455.31
18	1	94	4	1	3	2	6	5	6	0	5	5	0	1	0	0	-3.01	1759.36
18	1	95	3	4	2	6	1	5	3	0	1	1	0	0	0	0	-3.01	799.386
18	1	96	5	4	6	2	3	1	1	0	6	6	0	0	0	0	-3.01	655.454
18	1	97	6	3	2	5	4	1	5	0	4	4	0	0	0	0	-3.01	991.505
18	1	98	6	3	2	5	4	1	2	0	3	3	0	0	1	0.01	-3	18494.9
18	1	99	1	3	2	6	4	5	4	0	5	5	0	0	0	0	-3	927.43
18	1	100	1	2	4	6	3	5	6	0	4	4	0	0	0	0	-3	1823.39
19	2	1	2	5	3	1	4	6	0	5	2	2	0	0	0	0	0	953.201
19	2	2	4	1	5	3	6	2	0	2	6	6	0	0	0	0	0	1165.12
19	2	3	4	3	2	5	1	6	0	4	1	1	0	0	0	0	0	1021.19
19	2	4	5	1	4	3	6	2	0	6	5	5	0	0	0	0	0	1053.16
19	2	5	5	1	4	3	6	2	0	3	4	4	0	0	1	0.01	0.01	3421.14
19	2	6	6	4	3	2	5	1	0	1	6	6	0	0	0	0	0.01	1789.17
19	2	7	3	6	5	2	4	1	0	5	3	3	0	0	0	0	0.01	1629.13
19	2	8	6	1	5	2	3	4	0	2	4	4	0	0	0	0	0.01	877.223
19	2	9	3	1	2	6	4	5	0	4	5	5	0	0	0	0	0.01	1053.27
19	2	10	3	1	2	6	4	5	0	6	4	4	0	0	1	0.5	0.51	3053.1
19	2	11	6	1	3	4	2	5	0	3	3	3	0	0	0	0	0.51	1309.23
19	2	12	1	2	3	6	4	5	0	1	1	1	0	0	0	0	0.51	909.2
19	2	13	6	1	5	3	4	2	0	5	3	3	0	0	0	0	0.51	1213.26
19	2	14	6	1	5	3	4	2	0	2	6	6	0	0	1	0.5	1.01	2029.16
19	2	15	6	3	4	1	5	2	0	4	3	3	0	0	0	0	1.01	1021.19
19	2	16	4	6	1	2	3	5	0	6	2	2	0	0	0	0	1.01	1453.19
19	2	17	1	5	4	2	3	6	0	3	5	5	0	0	0	0	1.01	973.247
19	2	18	5	4	2	1	6	3	0	1	4	4	0	0	0	0	1.01	1213.24
19	2	19	5	4	2	1	6	3	0	5	1	1	0	0	1	0.5	1.51	1437.24
19	2	20	4	2	5	6	3	1	0	2	2	2	0	0	0	0	1.51	1805.2
19	2	21	5	3	1	4	2	6	0	4	4	4	0	0	0	0	1.51	1005.21
19	2	22	2	6	1	5	4	3	0	6	2	2	0	0	0	0	1.51	1293.29
19	2	23	2	6	1	5	4	3	0	3	6	6	0	0	1	0.5	2.01	3005.14
19	2	24	6	4	1	3	2	5	0	1	3	3	0	0	0	0	2.01	1085.25
19	2	25	3	1	4	2	6	5	0	5	6	6	0	0	0	0	2.01	1341.19
19	2	26	3	1	4	2	6	5	0	2	4	4	0	0	1	0.5	2.51	2205.2
19	2	27	1	2	3	6	4	5	0	4	5	5	0	0	0	0	2.51	845.228
19	2	28	6	2	1	4	3	5	0	6	1	1	0	0	0	0	2.51	861.215
19	2	29	6	5	1	3	2	4	0	3	4	4	0	0	0	0	2.51	1117.25
19	2	30	6	5	1	3	2	4	0	1	3	3	0	0	1	0.5	3.01	1069.25
19	2	31	4	3	2	1	6	5	0	5	6	6	0	0	0	0	3.01	973.253
19	2	32	3	6	5	2	4	1	0	2	4	4	0	0	0	0	3.01	957.259
19	2	33	1	3	5	6	4	2	0	4	5	5	0	0	0	0	3.01	797.211
19	2	34	1	6	2	3	4	5	0	6	2	2	0	0	0	0	3.01	957.251
19	2	35	5	4	3	2	1	6	0	3	3	3	0	0	0	0	3.01	1133.21
19	2	36	2	5	6	1	3	4	0	1	4	4	0	0	0	0	3.01	1117.2
19	2	37	5	4	2	6	3	1	0	5	1	1	0	0	0	0	3.01	973.261
19	2	38	1	3	2	5	6	4	0	2	3	3	0	0	0	0	3.01	1149.18
19	2	39	1	3	2	5	6	4	0	4	6	6	0	0	1	0.5	3.51	1725.25
19	2	40	5	4	2	1	6	3	0	6	5	5	0	0	0	0	3.51	909.245
19	2	41	5	6	4	3	1	2	0	3	4	4	0	0	0	0	3.51	877.251
19	2	42	4	5	1	2	3	6	0	1	3	3	0	0	0	0	3.51	845.211
19	2	43	4	5	1	2	3	6	0	5	2	2	0	0	1	0.5	4.01	1485.25
19	2	44	6	5	3	4	2	1	0	2	5	5	0	0	0	0	4.01	1293.23
19	2	45	6	3	4	2	1	5	0	4	3	3	0	0	0	0	4.01	893.263
19	2	46	4	5	1	3	2	6	0	6	6	6	0	0	0	0	4.01	1005.22
19	2	47	6	2	3	1	4	5	0	3	3	3	0	0	0	0	4.01	989.241
19	2	48	6	2	3	1	4	5	0	1	4	4	0	0	1	0.5	4.51	1197.17
19	2	49	2	5	1	4	3	6	0	5	2	2	0	0	0	0	4.51	813.285
19	2	50	6	1	2	4	5	3	0	2	3	3	0	0	0	0	4.51	1725.2
19	2	51	5	3	1	6	2	4	0	4	6	6	0	0	0	0	4.51	781.204
19	2	52	1	6	2	5	3	4	0	6	2	2	0	0	0	0	4.51	941.265
19	2	53	1	6	2	5	3	4	0	3	5	5	0	0	1	0.5	5.01	3293.19
19	2	54	6	4	1	5	3	2	0	1	3	3	0	0	0	0	5.01	909.279
19	2	55	4	2	1	3	6	5	0	5	6	6	0	0	0	0	5.01	1053.15
19	2	56	6	4	5	2	1	3	0	2	4	4	0	0	0	0	5.01	957.206
19	2	57	4	1	3	6	2	5	0	4	1	1	0	0	0	0	5.01	893.236
19	2	58	2	5	6	4	3	1	0	6	3	3	0	0	0	0	5.01	925.234
19	2	59	6	2	4	5	1	3	0	3	6	6	0	0	0	0	5.01	765.212
19	2	60	6	2	4	5	1	3	0	1	5	5	0	0	1	0.5	5.51	1149.27
19	2	61	5	4	3	6	1	2	0	5	1	1	0	0	0	0	5.51	813.226
19	2	62	4	5	2	1	3	6	0	2	3	3	0	0	0	0	5.51	925.224
19	2	63	4	3	5	2	6	1	0	4	1	1	0	0	0	0	5.51	845.243
19	2	64	4	3	5	2	6	1	0	6	5	5	0	0	1	0.5	6.01	1085.22
20	2	1	4	1	5	2	6	3	0	2	4	4	0	0	0	0	0	14630.4
20	2	2	5	2	3	1	6	4	0	5	1	1	0	0	0	0	0	2284.96
20	2	3	5	3	1	6	4	2	0	3	2	2	0	0	0	0	0	3325
20	2	4	2	5	4	1	6	3	0	4	3	3	0	0	0	0	0	1437.13
20	2	5	2	5	4	1	6	3	0	1	4	4	0	0	1	0.5	0.5	8172.75
20	2	6	5	3	6	2	4	1	0	5	1	1	0	0	0	0	0.5	1869.06
20	2	7	1	4	6	5	2	3	0	6	3	3	0	0	0	0	0.5	2925.03
20	2	8	4	2	3	5	6	1	0	2	2	2	0	0	0	0	0.5	1981.04
20	2	9	3	4	1	6	2	5	0	5	6	6	0	0	0	0	0.5	2205.08
20	2	10	3	4	1	6	2	5	0	3	1	4	1	0	1	0.5	0	3213.01
20	2	11	5	2	1	4	6	3	0	4	4	4	0	1	0	0	0	2349.03
20	2	12	2	3	1	6	5	4	0	1	3	3	0	0	0	0	0	2221.04
20	2	13	6	2	5	1	3	4	0	5	3	3	0	0	0	0	0	1357.05
20	2	14	6	2	5	1	3	4	0	6	1	2	1	0	1	0.5	-0.5	5484.99
20	2	15	4	2	6	5	1	3	0	2	2	2	0	1	0	0	-0.5	1261.01
20	2	16	2	4	5	3	6	1	0	5	3	3	0	0	0	0	-0.5	2589.05
20	2	17	1	6	2	5	3	4	0	3	5	5	0	0	0	0	-0.5	3149.04
20	2	18	6	1	2	4	5	3	0	4	4	4	0	0	0	0	-0.5	1549.07
20	2	19	6	1	2	4	5	3	0	1	2	1	1	0	1	0.5	-1	2893.01
20	2	20	6	4	5	2	1	3	0	5	3	3	0	1	0	0	-1	2317.09
20	2	21	6	2	1	5	3	4	0	6	1	1	0	0	0	0	-1	2285.08
20	2	22	1	5	4	2	3	6	0	2	4	4	0	0	0	0	-1	1741.06
20	2	23	1	5	4	2	3	6	0	5	2	1	1	0	1	0.5	-1.5	2797.03
20	2	24	1	2	3	6	5	4	0	3	3	3	0	1	0	0	-1.5	1245.1
20	2	25	1	6	2	5	4	3	0	4	5	5	0	0	0	0	-1.5	1613.03
20	2	26	1	6	2	5	4	3	0	1	1	2	1	0	1	0.5	-2	3229.02
20	2	27	1	3	2	4	6	5	0	5	6	6	0	1	0	0	-2	1501.09
20	2	28	3	4	5	6	1	2	0	6	4	4	0	0	0	0	-2	1453.07
20	2	29	5	2	4	1	6	3	0	2	2	2	0	0	0	0	-2	1037.1
20	2	30	5	2	4	1	6	3	0	5	1	6	1	0	1	0.5	-2.5	1965.06
20	2	31	2	6	3	4	1	5	0	3	3	3	0	1	0	0	-2.5	1261.06
20	2	32	5	3	6	2	1	4	0	4	6	6	0	0	0	0	-2.5	1485.12
20	2	33	3	2	5	1	6	4	0	1	4	4	0	0	0	0	-2.5	1869.03
20	2	34	4	6	1	3	5	2	0	5	5	5	0	0	0	0	-2.5	1981.08
20	2	35	3	4	6	1	5	2	0	6	3	3	0	0	0	0	-2.5	1469.08
20	2	36	2	6	3	5	1	4	0	2	1	1	0	0	0	0	-2.5	1245.09
20	2	37	1	6	3	4	2	5	0	5	6	6	0	0	0	0	-2.5	1261.06
20	2	38	2	6	4	5	3	1	0	3	5	5	0	0	0	0	-2.5	2077.06
20	2	39	2	6	4	5	3	1	0	4	3	3	0	0	1	0.5	-2	2125.07
20	2	40	6	2	4	3	1	5	0	1	5	5	0	0	0	0	-2	1485.08
20	2	41	4	1	3	6	2	5	0	5	6	6	0	0	0	0	-2	813.102
20	2	42	6	3	2	5	1	4	0	6	1	1	0	0	0	0	-2	925.073
20	2	43	6	3	2	5	1	4	0	2	3	3	0	0	1	0.5	-1.5	1981.15
20	2	44	5	4	6	1	3	2	0	5	1	1	0	0	0	0	-1.5	909.049
20	2	45	5	4	6	2	1	3	0	3	6	6	0	0	0	0	-1.5	829.055
20	2	46	2	4	3	5	6	1	0	4	2	2	0	0	0	0	-1.5	909.154
20	2	47	6	4	5	2	1	3	0	1	5	5	0	0	0	0	-1.5	1053.07
20	2	48	6	4	5	2	1	3	0	5	3	2	1	0	1	0.5	-2	2765.04
20	2	49	6	3	1	4	2	5	0	6	1	1	0	1	0	0	-2	1709.12
20	2	50	6	2	5	3	4	1	0	2	2	2	0	0	0	0	-2	829.076
20	2	51	6	3	2	5	4	1	0	5	4	4	0	0	0	0	-2	1677.1
20	2	52	1	6	3	5	2	4	0	3	3	3	0	0	0	0	-2	957.096
20	2	53	1	6	3	5	2	4	0	4	6	2	1	0	1	0.5	-2.5	2541.05
20	2	54	3	1	2	5	6	4	0	1	2	2	0	1	0	0	-2.5	733.094
20	2	55	4	2	3	5	6	1	0	5	4	4	0	0	0	0	-2.5	1341.11
20	2	56	5	2	6	3	1	4	0	6	3	3	0	0	0	0	-2.5	1021.1
20	2	57	2	4	6	1	3	5	0	2	1	1	0	0	0	0	-2.5	941.087
20	2	58	1	3	6	2	5	4	0	5	5	5	0	0	0	0	-2.5	1165.12
20	2	59	6	4	1	3	5	2	0	3	4	4	0	0	0	0	-2.5	1277.13
20	2	60	1	4	2	6	3	5	0	4	2	2	0	0	1	0.5	-2	1597.09
20	2	61	1	5	3	4	6	2	0	1	1	1	0	0	0	0	-2	813.157
20	2	62	6	1	3	4	2	5	0	5	6	6	0	0	0	0	-2	1229.03
20	2	63	5	2	4	1	3	6	0	6	6	1	1	0	0	0	-2	2013.07
20	2	64	5	2	4	1	3	6	0	2	2	1	1	1	1	0.5	-2.5	1629.04
20	2	65	5	1	6	2	4	3	0	5	1	1	0	1	0	0	-2.5	653.154
20	2	66	1	4	2	5	6	3	0	3	6	6	0	0	0	0	-2.5	861.116
20	2	67	3	6	2	5	4	1	0	4	5	1	1	0	0	0	-2.5	6924.97
20	2	68	6	5	4	3	2	1	0	1	6	6	0	1	0	0	-2.5	2364.96
20	2	69	6	5	4	3	2	1	0	5	2	2	0	0	1	0.5	-2	3581.09
20	2	70	6	1	5	3	2	4	0	6	1	1	0	0	0	0	-2	1453.11
20	2	71	5	3	4	2	6	1	0	2	4	5	1	0	0	0	-2	6428.92
20	2	72	2	4	6	1	5	3	0	5	5	5	0	1	0	0	-2	1965.06
20	2	73	5	3	4	2	1	6	0	3	2	2	0	0	0	0	-2	1773.07
20	2	74	5	3	4	2	1	6	0	4	3	3	0	0	1	0.5	-1.5	1677.08
20	2	75	5	2	3	1	4	6	0	1	4	4	0	0	0	0	-1.5	1165.15
20	2	76	6	5	3	4	2	1	0	5	2	2	0	0	0	0	-1.5	1005.12
20	2	77	6	5	3	4	2	1	0	6	1	6	1	0	1	0.5	-2	2605.07
20	2	78	4	1	2	3	5	6	0	2	3	3	0	1	0	0	-2	1725.11
20	2	79	1	4	6	2	3	5	0	5	6	3	1	0	0	0	-2	973.135
20	2	80	4	1	5	2	3	6	0	3	5	5	0	1	0	0	-2	957.127
20	2	81	4	1	2	5	3	6	0	4	1	1	0	0	0	0	-2	925.1
20	2	82	4	1	2	5	3	6	0	1	2	2	0	0	1	0.5	-1.5	1053.11
20	2	83	5	4	6	3	2	1	0	5	1	1	0	0	0	0	-1.5	733.087
20	2	84	4	1	5	2	6	3	0	6	5	5	0	0	0	0	-1.5	2413.15
20	2	85	4	1	2	6	3	5	0	2	3	3	0	0	0	0	-1.5	1085.05
20	2	86	6	2	4	3	1	5	0	5	6	6	0	0	0	0	-1.5	1485.11
20	2	87	6	2	4	3	1	5	0	3	4	5	1	0	1	0.5	-2	1725.08
20	2	88	2	3	6	5	4	1	0	4	5	5	0	1	0	0	-2	877.116
20	2	89	4	1	3	2	6	5	0	1	2	2	0	0	0	0	-2	861.162
20	2	90	5	1	2	4	3	6	0	5	1	1	0	0	0	0	-2	1101.11
20	2	91	2	4	3	5	1	6	0	6	6	6	0	0	0	0	-2	1133.07
20	2	92	2	4	1	6	5	3	0	2	1	1	0	0	0	0	-2	1357.12
20	2	93	2	4	1	6	5	3	0	5	5	2	1	0	1	0.5	-2.5	1341.1
20	2	94	1	3	4	5	6	2	0	3	2	2	0	1	0	0	-2.5	765.16
20	2	95	5	2	1	4	3	6	0	4	4	4	0	0	0	0	-2.5	1389.07
20	2	96	6	2	1	4	3	5	0	1	3	3	0	0	0	0	-2.5	1501.02
20	2	97	4	5	1	2	3	6	0	5	2	2	0	0	0	0	-2.5	1853.12
20	2	98	4	5	1	2	3	6	0	6	6	3	1	0	1	0.5	-3	765.14
20	2	99	1	2	6	4	5	3	0	2	2	2	0	1	0	0	-3	877.105
20	2	100	6	1	2	3	5	4	0	5	5	5	0	0	0	0	-3	1181.09
21	1	1	4	1	5	2	6	3	2	0	4	4	0	0	0	0	0	1193.61
21	1	2	5	2	3	1	6	4	5	0	1	1	0	0	0	0	0	999.565
21	1	3	5	3	1	6	4	2	3	0	2	2	0	0	0	0	0	1046.51
21	1	4	2	5	4	1	6	3	4	0	3	3	0	0	0	0	0	1276.62
21	1	5	2	5	4	1	6	3	1	0	4	4	0	0	1	0.5	0.5	3693.21
21	1	6	5	3	6	2	4	1	5	0	1	1	0	0	0	0	0.5	1195.58
21	1	7	1	4	6	5	2	3	6	0	3	3	0	0	0	0	0.5	1423.71
21	1	8	4	2	3	5	6	1	2	0	2	2	0	0	0	0	0.5	980.346
21	1	9	3	4	1	6	2	5	5	0	6	6	0	0	0	0	0.5	1171.15
21	1	10	3	4	1	6	2	5	3	0	1	4	1	0	1	0.01	0.49	2872.23
21	1	11	5	2	1	4	6	3	4	0	4	4	0	1	0	0	0.49	1428.86
21	1	12	2	3	1	6	5	4	1	0	3	3	0	0	0	0	0.49	1145.32
21	1	13	6	2	5	1	3	4	5	0	3	3	0	0	0	0	0.49	1480.78
21	1	14	6	2	5	1	3	4	6	0	1	4	1	0	1	0.01	0.48	980.571
21	1	15	4	2	6	5	1	3	2	0	2	1	1	1	0	0	0.48	2393.63
21	1	16	2	4	5	3	6	1	5	0	3	3	0	1	0	0	0.48	1094.14
21	1	17	1	6	2	5	3	4	3	0	5	2	1	0	0	0	0.48	1438.26
21	1	18	6	1	2	4	5	3	4	0	4	4	0	1	0	0	0.48	926.546
21	1	19	6	1	2	4	5	3	1	0	2	5	1	0	1	0.5	-0.02	3133.48
21	1	20	6	4	5	2	1	3	5	0	3	3	0	1	0	0	-0.02	1262.1
21	1	21	6	2	1	5	3	4	6	0	1	1	0	0	0	0	-0.02	738.733
21	1	22	1	5	4	2	3	6	2	0	4	4	0	0	0	0	-0.02	926.511
21	1	23	1	5	4	2	3	6	5	0	2	6	1	0	1	0.5	-0.52	1449.57
21	1	24	1	2	3	6	5	4	3	0	3	3	0	1	0	0	-0.52	880.956
21	1	25	1	6	2	5	4	3	4	0	5	5	0	0	0	0	-0.52	1535.02
21	1	26	1	6	2	5	4	3	1	0	1	2	1	0	1	0.5	-1.02	3582.11
21	1	27	1	3	2	4	6	5	5	0	6	6	0	1	0	0	-1.02	980.665
21	1	28	3	4	5	6	1	2	6	0	4	4	0	0	0	0	-1.02	872.357
21	1	29	5	2	4	1	6	3	2	0	2	2	0	0	0	0	-1.02	977.6
21	1	30	5	2	4	1	6	3	5	0	1	1	0	0	1	0.01	-1.01	1782.41
21	1	31	2	6	3	4	1	5	3	0	3	4	1	0	0	0	-1.01	1879.05
21	1	32	5	3	6	2	1	4	4	0	6	6	0	1	0	0	-1.01	917.825
21	1	33	3	2	5	1	6	4	1	0	4	4	0	0	0	0	-1.01	858.387
21	1	34	4	6	1	3	5	2	5	0	5	5	0	0	0	0	-1.01	1236.56
21	1	35	3	4	6	1	5	2	6	0	3	3	0	0	0	0	-1.01	1170.74
[truncated: 4,129 more rows]
