# Supplementary material for: Concurrent visual sequence learning
Source: Psychol Res. 2023 Mar 22;87(7):2086–100. doi: 10.1007/s00426-023-01810-2 (PMC10457409; doi:10.1007/s00426-023-01810-2)
Supplement: Supplementary file 4 — Supplementary file4 (XLSX 2510 KB) [file 426_2023_1810_MOESM4_ESM.xlsx]

## Sheet: train
subject_number	condition	block	trial_total	trial	color target	shape target	color deviant	shape deviant	amot	answ	error	response time	miss	false alarm	color miss	shape miss
1	1	1	1	1	4	2	0	1	1	0	1	0	1	0	0	1
1	1	1	2	2	1	4	0	0	0	1	1	535.29	0	1	0	0
1	1	1	3	3	5	6	0	1	1	1	0	471.601	0	0	0	0
1	1	1	4	4	6	3	0	0	0	1	1	433.08	0	1	0	0
1	1	1	5	5	2	1	0	0	0	0	0	0	0	0	0	0
1	1	1	6	6	5	5	0	1	1	1	0	427.275	0	0	0	0
1	1	1	7	7	3	2	0	0	0	0	0	0	0	0	0	0
1	1	1	8	8	4	4	0	0	0	0	0	0	0	0	0	0
1	1	1	9	9	1	6	1	0	1	1	0	376.66	0	0	0	0
1	1	1	10	10	5	3	1	0	1	1	0	450.611	0	0	0	0
1	1	1	11	11	6	1	0	0	0	0	0	0	0	0	0	0
1	1	1	12	12	2	5	1	0	1	1	0	646.48	0	0	0	0
1	1	1	13	13	5	2	0	0	0	0	0	0	0	0	0	0
1	1	1	14	14	3	4	0	0	0	0	0	0	0	0	0	0
1	1	1	15	15	4	6	0	0	0	0	0	0	0	0	0	0
1	1	1	16	16	1	3	0	1	1	1	0	270.654	0	0	0	0
1	1	1	17	17	2	5	0	0	0	0	0	0	0	0	0	0
1	1	1	18	18	5	2	0	0	0	0	0	0	0	0	0	0
1	1	1	19	19	3	4	1	0	1	1	0	380.078	0	0	0	0
1	1	1	20	20	4	6	0	0	0	0	0	0	0	0	0	0
1	1	1	21	21	1	3	0	0	0	0	0	0	0	0	0	0
1	1	1	22	22	5	1	1	0	1	1	0	489.866	0	0	0	0
1	1	1	23	23	6	5	0	0	0	0	0	0	0	0	0	0
1	1	1	24	24	2	2	0	0	0	0	0	0	0	0	0	0
1	1	1	25	25	5	4	0	0	0	0	0	0	0	0	0	0
1	1	1	26	26	3	6	1	0	1	1	0	241.59	0	0	0	0
1	1	1	27	27	4	3	0	0	0	0	0	0	0	0	0	0
1	1	1	28	28	1	1	0	0	0	0	0	0	0	0	0	0
1	1	1	29	29	5	5	0	0	0	1	1	255.386	0	1	0	0
1	1	1	30	30	6	2	0	0	0	0	0	0	0	0	0	0
1	1	1	31	31	2	4	0	1	1	1	0	393.678	0	0	0	0
1	1	1	32	32	5	6	1	0	1	1	0	403.185	0	0	0	0
1	1	1	33	33	3	3	0	0	0	1	1	541.099	0	1	0	0
1	1	1	34	34	4	1	0	0	0	0	0	0	0	0	0	0
1	1	1	35	35	1	5	0	0	0	0	0	0	0	0	0	0
1	1	1	36	36	5	2	0	0	0	1	1	384.843	0	1	0	0
1	1	1	37	37	6	4	1	0	1	1	0	464.758	0	0	0	0
1	1	1	38	38	2	6	0	0	0	0	0	0	0	0	0	0
1	1	1	39	39	5	3	0	0	0	0	0	0	0	0	0	0
1	1	1	40	40	3	1	0	0	0	0	0	0	0	0	0	0
1	1	1	41	41	4	5	0	0	0	0	0	0	0	0	0	0
1	1	1	42	42	1	2	0	1	1	1	0	274.851	0	0	0	0
1	1	1	43	43	5	4	0	0	0	0	0	0	0	0	0	0
1	1	1	44	44	6	6	0	0	0	0	0	0	0	0	0	0
1	1	1	45	45	2	3	0	0	0	0	0	0	0	0	0	0
1	1	1	46	46	5	1	0	1	1	1	0	346.619	0	0	0	0
1	1	1	47	47	3	5	0	0	0	0	0	0	0	0	0	0
1	1	1	48	48	4	2	0	0	0	0	0	0	0	0	0	0
1	1	1	49	49	1	4	0	0	0	0	0	0	0	0	0	0
1	1	1	50	50	5	6	0	1	1	1	0	450.358	0	0	0	0
1	1	1	51	51	6	3	0	0	0	0	0	0	0	0	0	0
1	1	1	52	52	2	1	0	0	0	0	0	0	0	0	0	0
1	1	1	53	53	5	5	0	1	1	1	0	368.076	0	0	0	0
1	1	1	54	54	3	2	0	0	0	0	0	0	0	0	0	0
1	1	1	55	55	4	4	0	0	0	0	0	0	0	0	0	0
1	1	1	56	56	1	6	0	0	0	0	0	0	0	0	0	0
1	1	1	57	57	5	3	1	0	1	0	1	0	1	0	1	0
1	1	1	58	58	6	1	0	0	0	0	0	0	0	0	0	0
1	1	1	59	59	2	5	0	0	0	0	0	0	0	0	0	0
1	1	1	60	60	5	2	0	0	0	0	0	0	0	0	0	0
1	1	1	61	61	3	4	0	1	1	1	0	405.52	0	0	0	0
1	1	1	62	62	4	6	0	0	0	0	0	0	0	0	0	0
1	1	1	63	63	1	3	0	0	0	0	0	0	0	0	0	0
1	1	1	64	64	5	1	0	0	0	0	0	0	0	0	0	0
1	1	1	65	65	6	5	0	0	0	0	0	0	0	0	0	0
1	1	1	66	66	2	2	1	0	1	1	0	486.855	0	0	0	0
1	1	1	67	67	5	4	0	0	0	0	0	0	0	0	0	0
1	1	1	68	68	3	6	0	0	0	0	0	0	0	0	0	0
1	1	1	69	69	4	3	0	0	0	0	0	0	0	0	0	0
1	1	1	70	70	1	1	0	1	1	1	0	350.981	0	0	0	0
1	1	1	71	71	5	5	0	0	0	0	0	0	0	0	0	0
1	1	1	72	72	6	2	1	0	1	1	0	338.455	0	0	0	0
1	1	1	73	73	2	4	0	0	0	0	0	0	0	0	0	0
1	1	1	74	74	5	6	0	1	1	1	0	358.75	0	0	0	0
1	1	1	75	75	3	3	0	0	0	0	0	0	0	0	0	0
1	1	1	76	76	4	1	0	0	0	0	0	0	0	0	0	0
1	1	1	77	77	1	5	1	0	1	1	0	372.129	0	0	0	0
1	1	1	78	78	5	2	0	0	0	0	0	0	0	0	0	0
1	1	1	79	79	6	4	0	1	1	1	0	360.378	0	0	0	0
1	1	1	80	80	2	6	0	0	0	0	0	0	0	0	0	0
1	1	1	81	81	5	3	0	1	1	1	0	332.24	0	0	0	0
1	1	1	82	82	3	1	1	0	1	1	0	405.848	0	0	0	0
1	1	1	83	83	4	5	0	0	0	0	0	0	0	0	0	0
1	1	1	84	84	1	2	0	0	0	0	0	0	0	0	0	0
1	1	1	85	85	5	4	0	0	0	0	0	0	0	0	0	0
1	1	1	86	86	6	6	0	0	0	0	0	0	0	0	0	0
1	1	1	87	87	2	3	1	0	1	1	0	343.488	0	0	0	0
1	1	1	88	88	5	1	0	0	0	0	0	0	0	0	0	0
1	1	1	89	89	3	5	0	0	0	0	0	0	0	0	0	0
1	1	2	90	1	4	5	0	0	0	0	0	0	0	0	0	0
1	1	2	91	2	1	2	0	0	0	0	0	0	0	0	0	0
1	1	2	92	3	5	4	0	0	0	0	0	0	0	0	0	0
1	1	2	93	4	6	6	1	0	1	1	0	405.966	0	0	0	0
1	1	2	94	5	2	3	0	0	0	0	0	0	0	0	0	0
1	1	2	95	6	5	1	0	0	0	0	0	0	0	0	0	0
1	1	2	96	7	3	5	0	1	1	1	0	340.168	0	0	0	0
1	1	2	97	8	4	2	0	1	1	1	0	558.101	0	0	0	0
1	1	2	98	9	1	4	1	0	1	0	1	0	1	0	1	0
1	1	2	99	10	5	6	0	0	0	0	0	0	0	0	0	0
1	1	2	100	11	6	3	0	1	1	1	0	369.834	0	0	0	0
1	1	2	101	12	2	1	0	0	0	0	0	0	0	0	0	0
1	1	2	102	13	5	5	1	0	1	1	0	325.359	0	0	0	0
1	1	2	103	14	3	2	0	1	1	1	0	399.679	0	0	0	0
1	1	2	104	15	4	4	1	0	1	1	0	345.183	0	0	0	0
1	1	2	105	16	1	6	0	0	0	0	0	0	0	0	0	0
1	1	2	106	17	5	3	0	0	0	0	0	0	0	0	0	0
1	1	2	107	18	6	1	0	0	0	0	0	0	0	0	0	0
1	1	2	108	19	2	5	1	0	1	1	0	320.925	0	0	0	0
1	1	2	109	20	5	2	0	0	0	0	0	0	0	0	0	0
1	1	2	110	21	3	4	0	1	1	1	0	389.18	0	0	0	0
1	1	2	111	22	4	6	0	0	0	0	0	0	0	0	0	0
1	1	2	112	23	1	3	0	1	1	1	0	409.056	0	0	0	0
1	1	2	113	24	5	1	0	0	0	0	0	0	0	0	0	0
1	1	2	114	25	6	5	0	1	1	1	0	332.985	0	0	0	0
1	1	2	115	26	2	2	0	0	0	0	0	0	0	0	0	0
1	1	2	116	27	5	4	0	0	0	0	0	0	0	0	0	0
1	1	2	117	28	3	6	0	0	0	0	0	0	0	0	0	0
1	1	2	118	29	5	1	0	0	0	0	0	0	0	0	0	0
1	1	2	119	30	6	5	0	0	0	0	0	0	0	0	0	0
1	1	2	120	31	2	2	1	0	1	1	0	408.199	0	0	0	0
1	1	2	121	32	5	4	0	0	0	0	0	0	0	0	0	0
1	1	2	122	33	3	6	0	0	0	0	0	0	0	0	0	0
1	1	2	123	34	4	3	0	1	1	1	0	342.377	0	0	0	0
1	1	2	124	35	1	1	0	0	0	0	0	0	0	0	0	0
1	1	2	125	36	5	5	1	0	1	0	1	0	1	0	1	0
1	1	2	126	37	6	2	0	0	0	0	0	0	0	0	0	0
1	1	2	127	38	2	4	0	0	0	0	0	0	0	0	0	0
1	1	2	128	39	5	6	0	1	1	1	0	381.981	0	0	0	0
1	1	2	129	40	3	3	0	0	0	0	0	0	0	0	0	0
1	1	2	130	41	4	1	1	0	1	1	0	369.466	0	0	0	0
1	1	2	131	42	1	5	0	0	0	0	0	0	0	0	0	0
1	1	2	132	43	5	2	0	0	0	0	0	0	0	0	0	0
1	1	2	133	44	6	4	0	0	0	0	0	0	0	0	0	0
1	1	2	134	45	2	6	0	0	0	0	0	0	0	0	0	0
1	1	2	135	46	5	3	0	0	0	0	0	0	0	0	0	0
1	1	2	136	47	3	1	0	1	1	1	0	333.514	0	0	0	0
1	1	2	137	48	4	5	1	0	1	1	0	471.059	0	0	0	0
1	1	2	138	49	1	2	0	0	0	0	0	0	0	0	0	0
1	1	2	139	50	5	4	1	0	1	1	0	346.888	0	0	0	0
1	1	2	140	51	6	6	0	0	0	0	0	0	0	0	0	0
1	1	2	141	52	2	3	0	0	0	0	0	0	0	0	0	0
1	1	2	142	53	5	1	0	0	0	0	0	0	0	0	0	0
1	1	2	143	54	3	5	0	0	0	0	0	0	0	0	0	0
1	1	2	144	55	4	2	0	1	1	1	0	348.911	0	0	0	0
1	1	2	145	56	1	4	0	0	0	0	0	0	0	0	0	0
1	1	2	146	57	5	6	0	0	0	0	0	0	0	0	0	0
1	1	2	147	58	6	3	0	0	0	0	0	0	0	0	0	0
1	1	2	148	59	2	1	0	1	1	1	0	372.704	0	0	0	0
1	1	2	149	60	5	5	0	0	0	0	0	0	0	0	0	0
1	1	2	150	61	3	2	0	0	0	0	0	0	0	0	0	0
1	1	2	151	62	4	4	0	0	0	0	0	0	0	0	0	0
1	1	2	152	63	1	6	1	0	1	1	0	364.049	0	0	0	0
1	1	2	153	64	5	3	0	0	0	0	0	0	0	0	0	0
1	1	2	154	65	6	1	0	0	0	0	0	0	0	0	0	0
1	1	2	155	66	2	5	0	1	1	1	0	362.24	0	0	0	0
1	1	2	156	67	5	2	0	0	0	0	0	0	0	0	0	0
1	1	2	157	68	3	4	0	1	1	1	0	366.118	0	0	0	0
1	1	2	158	69	4	6	0	0	0	0	0	0	0	0	0	0
1	1	2	159	70	1	3	1	0	1	1	0	369.586	0	0	0	0
1	1	2	160	71	5	1	0	0	0	0	0	0	0	0	0	0
1	1	2	161	72	6	5	0	0	0	0	0	0	0	0	0	0
1	1	2	162	73	2	2	0	0	0	0	0	0	0	0	0	0
1	1	2	163	74	5	4	1	0	1	1	0	377.351	0	0	0	0
1	1	2	164	75	3	6	0	0	0	0	0	0	0	0	0	0
1	1	2	165	76	4	3	0	0	0	0	0	0	0	0	0	0
1	1	2	166	77	1	1	0	1	1	1	0	407.583	0	0	0	0
1	1	2	167	78	5	5	0	0	0	0	0	0	0	0	0	0
1	1	2	168	79	6	2	0	0	0	0	0	0	0	0	0	0
1	1	2	169	80	2	4	0	1	1	1	0	309.335	0	0	0	0
1	1	2	170	81	5	6	0	0	0	0	0	0	0	0	0	0
1	1	2	171	82	3	3	0	0	0	0	0	0	0	0	0	0
1	1	2	172	83	4	1	0	0	0	0	0	0	0	0	0	0
1	1	2	173	84	1	5	0	1	1	1	0	381.095	0	0	0	0
1	1	2	174	85	5	2	0	0	0	0	0	0	0	0	0	0
1	1	2	175	86	6	4	1	0	1	1	0	368.588	0	0	0	0
1	1	2	176	87	2	6	0	0	0	0	0	0	0	0	0	0
1	1	2	177	88	5	3	0	0	0	0	0	0	0	0	0	0
1	1	2	178	89	3	1	0	1	1	1	0	318.811	0	0	0	0
1	1	3	179	1	2	6	1	0	1	1	0	384.254	0	0	0	0
1	1	3	180	2	5	3	0	0	0	0	0	0	0	0	0	0
1	1	3	181	3	3	1	0	0	0	0	0	0	0	0	0	0
1	1	3	182	4	4	5	1	0	1	1	0	334.114	0	0	0	0
1	1	3	183	5	1	2	0	0	0	0	0	0	0	0	0	0
1	1	3	184	6	5	4	0	0	0	0	0	0	0	0	0	0
1	1	3	185	7	6	6	0	0	0	0	0	0	0	0	0	0
1	1	3	186	8	2	3	0	0	0	0	0	0	0	0	0	0
1	1	3	187	9	5	1	0	0	0	0	0	0	0	0	0	0
1	1	3	188	10	3	5	0	1	1	1	0	346.129	0	0	0	0
1	1	3	189	11	4	2	1	0	1	1	0	435.653	0	0	0	0
1	1	3	190	12	1	4	0	0	0	0	0	0	0	0	0	0
1	1	3	191	13	5	6	0	1	1	1	0	423.929	0	0	0	0
1	1	3	192	14	6	3	0	0	0	0	0	0	0	0	0	0
1	1	3	193	15	2	1	0	0	0	0	0	0	0	0	0	0
1	1	3	194	16	5	5	1	0	1	1	0	357.352	0	0	0	0
1	1	3	195	17	3	2	0	0	0	0	0	0	0	0	0	0
1	1	3	196	18	4	4	1	0	1	1	0	313.233	0	0	0	0
1	1	3	197	19	1	6	0	0	0	0	0	0	0	0	0	0
1	1	3	198	20	5	3	0	0	0	0	0	0	0	0	0	0
1	1	3	199	21	6	1	0	1	1	1	0	407.404	0	0	0	0
1	1	3	200	22	2	5	0	0	0	0	0	0	0	0	0	0
1	1	3	201	23	5	2	1	0	1	1	0	346.835	0	0	0	0
1	1	3	202	24	3	4	0	0	0	0	0	0	0	0	0	0
1	1	3	203	25	4	6	0	0	0	0	0	0	0	0	0	0
1	1	3	204	26	1	3	0	1	1	1	0	361.095	0	0	0	0
1	1	3	205	27	5	1	0	0	0	0	0	0	0	0	0	0
1	1	3	206	28	6	5	1	0	1	1	0	316.583	0	0	0	0
1	1	3	207	29	2	2	0	0	0	0	0	0	0	0	0	0
1	1	3	208	30	5	4	0	0	0	0	0	0	0	0	0	0
1	1	3	209	31	3	6	0	0	0	0	0	0	0	0	0	0
1	1	3	210	32	4	3	0	0	0	0	0	0	0	0	0	0
1	1	3	211	33	1	1	1	0	1	1	0	334.242	0	0	0	0
1	1	3	212	34	5	5	0	0	0	0	0	0	0	0	0	0
1	1	3	213	35	6	2	0	0	0	0	0	0	0	0	0	0
1	1	3	214	36	2	4	0	0	0	0	0	0	0	0	0	0
1	1	3	215	37	4	3	0	0	0	0	0	0	0	0	0	0
1	1	3	216	38	1	1	0	0	0	0	0	0	0	0	0	0
1	1	3	217	39	5	5	0	0	0	0	0	0	0	0	0	0
1	1	3	218	40	6	2	0	0	0	0	0	0	0	0	0	0
1	1	3	219	41	2	4	0	1	1	1	0	350.091	0	0	0	0
1	1	3	220	42	5	6	1	0	1	1	0	503.654	0	0	0	0
1	1	3	221	43	3	3	0	0	0	0	0	0	0	0	0	0
1	1	3	222	44	4	1	1	0	1	1	0	347.508	0	0	0	0
1	1	3	223	45	1	5	0	0	0	0	0	0	0	0	0	0
1	1	3	224	46	5	2	0	0	0	0	0	0	0	0	0	0
1	1	3	225	47	6	4	0	0	0	0	0	0	0	0	0	0
1	1	3	226	48	2	6	1	0	1	1	0	355.281	0	0	0	0
1	1	3	227	49	5	3	0	0	0	0	0	0	0	0	0	0
1	1	3	228	50	3	1	1	0	1	1	0	311.137	0	0	0	0
1	1	3	229	51	4	5	0	0	0	0	0	0	0	0	0	0
1	1	3	230	52	1	2	0	1	1	1	0	331.389	0	0	0	0
1	1	3	231	53	5	4	0	0	0	0	0	0	0	0	0	0
1	1	3	232	54	6	6	0	0	0	0	0	0	0	0	0	0
1	1	3	233	55	2	3	0	0	0	0	0	0	0	0	0	0
1	1	3	234	56	5	1	0	1	1	1	0	371.141	0	0	0	0
1	1	3	235	57	3	5	0	0	0	0	0	0	0	0	0	0
1	1	3	236	58	4	2	0	0	0	0	0	0	0	0	0	0
1	1	3	237	59	1	4	1	0	1	1	0	400.57	0	0	0	0
1	1	3	238	60	5	6	0	1	1	1	0	426.856	0	0	0	0
1	1	3	239	61	6	3	0	0	0	0	0	0	0	0	0	0
1	1	3	240	62	2	1	1	0	1	1	0	334.379	0	0	0	0
1	1	3	241	63	5	5	1	0	1	1	0	424.278	0	0	0	0
1	1	3	242	64	3	2	0	0	0	0	0	0	0	0	0	0
1	1	3	243	65	4	4	0	1	1	1	0	412.582	0	0	0	0
1	1	3	244	66	1	6	0	0	0	0	0	0	0	0	0	0
1	1	3	245	67	5	3	0	0	0	0	0	0	0	0	0	0
1	1	3	246	68	6	1	0	0	0	0	0	0	0	0	0	0
1	1	3	247	69	2	5	0	0	0	0	0	0	0	0	0	0
1	1	3	248	70	5	2	0	1	1	1	0	366.285	0	0	0	0
1	1	3	249	71	3	4	0	0	0	0	0	0	0	0	0	0
1	1	3	250	72	4	6	0	0	0	0	0	0	0	0	0	0
1	1	3	251	73	1	3	0	0	0	0	0	0	0	0	0	0
1	1	3	252	74	5	1	0	1	1	1	0	358.004	0	0	0	0
1	1	3	253	75	6	5	0	0	0	0	0	0	0	0	0	0
1	1	3	254	76	2	2	1	0	1	1	0	441.492	0	0	0	0
1	1	3	255	77	5	4	0	0	0	0	0	0	0	0	0	0
1	1	3	256	78	3	6	0	1	1	1	0	397.764	0	0	0	0
1	1	3	257	79	4	3	0	0	0	0	0	0	0	0	0	0
1	1	3	258	80	1	1	0	0	0	0	0	0	0	0	0	0
1	1	3	259	81	5	5	0	0	0	0	0	0	0	0	0	0
1	1	3	260	82	6	2	1	0	1	1	0	309.11	0	0	0	0
1	1	3	261	83	2	4	0	0	0	0	0	0	0	0	0	0
1	1	3	262	84	5	6	0	0	0	0	0	0	0	0	0	0
1	1	3	263	85	3	3	0	1	1	1	0	355.318	0	0	0	0
1	1	3	264	86	4	1	0	0	0	0	0	0	0	0	0	0
1	1	3	265	87	1	5	0	0	0	0	0	0	0	0	0	0
1	1	3	266	88	5	2	1	0	1	1	0	592.742	0	0	0	0
1	1	3	267	89	6	4	0	0	0	0	0	0	0	0	0	0
1	1	4	268	1	2	5	0	0	0	0	0	0	0	0	0	0
1	1	4	269	2	5	2	0	1	1	1	0	370.351	0	0	0	0
1	1	4	270	3	3	4	0	0	0	0	0	0	0	0	0	0
1	1	4	271	4	4	6	1	0	1	1	0	293.812	0	0	0	0
1	1	4	272	5	1	3	0	0	0	0	0	0	0	0	0	0
1	1	4	273	6	5	1	0	0	0	0	0	0	0	0	0	0
1	1	4	274	7	6	5	1	0	1	1	0	307.593	0	0	0	0
1	1	4	275	8	2	2	0	0	0	0	0	0	0	0	0	0
1	1	4	276	9	5	4	0	0	0	0	0	0	0	0	0	0
1	1	4	277	10	3	6	0	0	0	0	0	0	0	0	0	0
1	1	4	278	11	4	3	0	0	0	0	0	0	0	0	0	0
1	1	4	279	12	1	1	1	0	1	1	0	357.244	0	0	0	0
1	1	4	280	13	5	5	0	0	0	0	0	0	0	0	0	0
1	1	4	281	14	6	2	0	0	0	0	0	0	0	0	0	0
1	1	4	282	15	2	4	0	0	0	0	0	0	0	0	0	0
1	1	4	283	16	5	6	0	1	1	1	0	381.42	0	0	0	0
1	1	4	284	17	3	3	0	0	0	0	0	0	0	0	0	0
1	1	4	285	18	4	1	0	0	0	0	0	0	0	0	0	0
1	1	4	286	19	1	5	0	0	0	0	0	0	0	0	0	0
1	1	4	287	20	5	2	0	0	0	0	0	0	0	0	0	0
1	1	4	288	21	5	6	0	1	1	1	0	367.163	0	0	0	0
1	1	4	289	22	3	3	0	0	0	0	0	0	0	0	0	0
1	1	4	290	23	4	1	0	0	0	0	0	0	0	0	0	0
1	1	4	291	24	1	5	0	0	0	0	0	0	0	0	0	0
1	1	4	292	25	5	2	0	0	0	0	0	0	0	0	0	0
1	1	4	293	26	6	4	0	0	0	0	0	0	0	0	0	0
1	1	4	294	27	2	6	0	0	0	0	0	0	0	0	0	0
1	1	4	295	28	5	3	0	1	1	1	0	276.723	0	0	0	0
1	1	4	296	29	3	1	0	0	0	0	0	0	0	0	0	0
1	1	4	297	30	4	5	0	0	0	0	0	0	0	0	0	0
1	1	4	298	31	1	2	1	0	1	1	0	354.066	0	0	0	0
1	1	4	299	32	5	4	0	0	0	0	0	0	0	0	0	0
1	1	4	300	33	6	6	1	0	1	1	0	309.936	0	0	0	0
1	1	4	301	34	2	3	0	1	1	1	0	432.269	0	0	0	0
1	1	4	302	35	5	1	0	0	0	0	0	0	0	0	0	0
1	1	4	303	36	3	5	1	0	1	1	0	323.771	0	0	0	0
1	1	4	304	37	4	2	0	0	0	0	0	0	0	0	0	0
1	1	4	305	38	1	4	0	0	0	0	0	0	0	0	0	0
1	1	4	306	39	5	6	0	1	1	1	0	385.98	0	0	0	0
1	1	4	307	40	6	3	0	0	0	0	0	0	0	0	0	0
1	1	4	308	41	2	1	0	0	0	0	0	0	0	0	0	0
1	1	4	309	42	5	5	1	0	1	1	0	351.372	0	0	0	0
1	1	4	310	43	3	2	1	0	1	1	0	409.359	0	0	0	0
1	1	4	311	44	4	4	0	0	0	0	0	0	0	0	0	0
1	1	4	312	45	1	6	0	0	0	0	0	0	0	0	0	0
1	1	4	313	46	5	3	0	1	1	1	0	359.556	0	0	0	0
1	1	4	314	47	6	1	0	0	0	0	0	0	0	0	0	0
1	1	4	315	48	2	5	0	0	0	0	0	0	0	0	0	0
1	1	4	316	49	5	2	0	1	1	1	0	405.339	0	0	0	0
1	1	4	317	50	3	4	0	0	0	0	0	0	0	0	0	0
1	1	4	318	51	4	6	1	0	1	1	0	328.809	0	0	0	0
1	1	4	319	52	1	3	0	0	0	0	0	0	0	0	0	0
1	1	4	320	53	5	1	0	0	0	0	0	0	0	0	0	0
1	1	4	321	54	6	5	0	0	0	0	0	0	0	0	0	0
1	1	4	322	55	2	2	0	0	0	0	0	0	0	0	0	0
1	1	4	323	56	5	4	0	1	1	1	0	378.901	0	0	0	0
1	1	4	324	57	3	6	0	0	0	0	0	0	0	0	0	0
1	1	4	325	58	4	3	0	0	0	0	0	0	0	0	0	0
1	1	4	326	59	1	1	0	0	0	0	0	0	0	0	0	0
1	1	4	327	60	5	5	1	0	1	1	0	402.234	0	0	0	0
1	1	4	328	61	6	2	1	0	1	1	0	412.199	0	0	0	0
1	1	4	329	62	2	4	0	0	0	0	0	0	0	0	0	0
1	1	4	330	63	5	6	0	1	1	1	0	384.436	0	0	0	0
1	1	4	331	64	3	3	0	0	0	0	0	0	0	0	0	0
1	1	4	332	65	4	1	0	1	1	1	0	340.327	0	0	0	0
1	1	4	333	66	1	5	0	0	0	0	0	0	0	0	0	0
1	1	4	334	67	5	2	0	0	0	0	0	0	0	0	0	0
1	1	4	335	68	6	4	0	0	0	0	0	0	0	0	0	0
1	1	4	336	69	2	6	1	0	1	1	0	347.653	0	0	0	0
1	1	4	337	70	5	3	0	0	0	0	0	0	0	0	0	0
1	1	4	338	71	3	1	0	0	0	0	0	0	0	0	0	0
1	1	4	339	72	4	5	0	1	1	1	0	361.857	0	0	0	0
1	1	4	340	73	1	2	1	0	1	1	0	451.385	0	0	0	0
1	1	4	341	74	5	4	0	0	0	0	0	0	0	0	0	0
1	1	4	342	75	6	6	0	0	0	0	0	0	0	0	0	0
1	1	4	343	76	2	3	0	1	1	1	0	369.577	0	0	0	0
1	1	4	344	77	5	1	0	0	0	0	0	0	0	0	0	0
1	1	4	345	78	3	5	1	0	1	1	0	341.099	0	0	0	0
1	1	4	346	79	4	2	0	0	0	0	0	0	0	0	0	0
1	1	4	347	80	1	4	0	0	0	0	0	0	0	0	0	0
1	1	4	348	81	5	6	0	0	0	0	0	0	0	0	0	0
1	1	4	349	82	6	3	1	0	1	1	0	316.845	0	0	0	0
1	1	4	350	83	2	1	0	0	0	0	0	0	0	0	0	0
1	1	4	351	84	5	5	0	0	0	0	0	0	0	0	0	0
1	1	4	352	85	3	2	0	0	0	0	0	0	0	0	0	0
1	1	4	353	86	4	4	0	0	0	0	0	0	0	0	0	0
1	1	4	354	87	1	6	1	0	1	1	0	318.518	0	0	0	0
1	1	4	355	88	5	3	0	0	0	0	0	0	0	0	0	0
1	1	4	356	89	6	1	0	0	0	0	0	0	0	0	0	0
1	1	5	357	1	3	6	0	0	0	0	0	0	0	0	0	0
1	1	5	358	2	4	3	0	0	0	0	0	0	0	0	0	0
1	1	5	359	3	1	1	1	0	1	1	0	316.139	0	0	0	0
1	1	5	360	4	5	5	0	0	0	0	0	0	0	0	0	0
1	1	5	361	5	6	2	0	0	0	0	0	0	0	0	0	0
1	1	5	362	6	2	4	0	0	0	0	0	0	0	0	0	0
1	1	5	363	7	5	6	0	0	0	0	0	0	0	0	0	0
1	1	5	364	8	3	3	0	1	1	1	0	366.237	0	0	0	0
1	1	5	365	9	4	1	0	0	0	0	0	0	0	0	0	0
1	1	5	366	10	1	5	0	0	0	0	0	0	0	0	0	0
1	1	5	367	11	5	2	0	0	0	0	0	0	0	0	0	0
1	1	5	368	12	6	4	0	1	1	1	0	390.002	0	0	0	0
1	1	5	369	13	2	6	0	0	0	0	0	0	0	0	0	0
1	1	5	370	14	5	3	0	0	0	0	0	0	0	0	0	0
1	1	5	371	15	3	1	0	0	0	0	0	0	0	0	0	0
1	1	5	372	16	4	5	0	1	1	1	0	333.703	0	0	0	0
1	1	5	373	17	6	4	0	0	0	0	0	0	0	0	0	0
1	1	5	374	18	2	6	1	0	1	1	0	369.135	0	0	0	0
1	1	5	375	19	5	3	0	0	0	0	0	0	0	0	0	0
1	1	5	376	20	3	1	0	0	0	0	0	0	0	0	0	0
1	1	5	377	21	4	5	1	0	1	1	0	302.924	0	0	0	0
1	1	5	378	22	1	2	0	1	1	1	0	457.314	0	0	0	0
1	1	5	379	23	5	4	0	1	1	1	0	387.258	0	0	0	0
1	1	5	380	24	6	6	0	0	0	0	0	0	0	0	0	0
1	1	5	381	25	2	3	0	0	0	0	0	0	0	0	0	0
1	1	5	382	26	5	1	0	1	1	1	0	353.042	0	0	0	0
1	1	5	383	27	3	5	0	0	0	0	0	0	0	0	0	0
1	1	5	384	28	4	2	0	0	0	0	0	0	0	0	0	0
1	1	5	385	29	1	4	0	0	0	0	0	0	0	0	0	0
1	1	5	386	30	5	6	1	0	1	1	0	376.404	0	0	0	0
1	1	5	387	31	6	3	1	0	1	1	0	354.346	0	0	0	0
1	1	5	388	32	2	1	0	1	1	1	0	332.667	0	0	0	0
1	1	5	389	33	5	5	0	0	0	0	0	0	0	0	0	0
1	1	5	390	34	3	2	1	0	1	1	0	432.174	0	0	0	0
1	1	5	391	35	4	4	0	0	0	0	0	0	0	0	0	0
1	1	5	392	36	1	6	0	0	0	0	0	0	0	0	0	0
1	1	5	393	37	5	3	0	1	1	1	0	350.346	0	0	0	0
1	1	5	394	38	6	1	0	0	0	0	0	0	0	0	0	0
1	1	5	395	39	2	5	0	0	0	0	0	0	0	0	0	0
1	1	5	396	40	5	2	0	0	0	0	0	0	0	0	0	0
1	1	5	397	41	3	4	0	1	1	1	0	358.045	0	0	0	0
1	1	5	398	42	4	6	0	0	0	0	0	0	0	0	0	0
1	1	5	399	43	1	3	1	0	1	1	0	281.544	0	0	0	0
1	1	5	400	44	5	1	0	0	0	0	0	0	0	0	0	0
1	1	5	401	45	6	5	0	0	0	0	0	0	0	0	0	0
1	1	5	402	46	2	2	0	0	0	0	0	0	0	0	0	0
1	1	5	403	47	5	4	0	0	0	0	0	0	0	0	0	0
1	1	5	404	48	3	6	1	0	1	1	0	299.214	0	0	0	0
1	1	5	405	49	4	3	0	0	0	0	0	0	0	0	0	0
1	1	5	406	50	1	1	0	0	0	0	0	0	0	0	0	0
1	1	5	407	51	5	5	0	0	0	0	0	0	0	0	0	0
1	1	5	408	52	6	2	1	0	1	1	0	322.988	0	0	0	0
1	1	5	409	53	2	4	0	0	0	0	0	0	0	0	0	0
1	1	5	410	54	5	6	0	0	0	0	0	0	0	0	0	0
1	1	5	411	55	3	3	1	0	1	1	0	336.746	0	0	0	0
1	1	5	412	56	4	1	0	1	1	1	0	459.103	0	0	0	0
1	1	5	413	57	1	5	0	0	0	0	0	0	0	0	0	0
1	1	5	414	58	5	2	0	0	0	0	0	0	0	0	0	0
1	1	5	415	59	6	4	0	1	1	1	0	376.921	0	0	0	0
1	1	5	416	60	2	6	0	0	0	0	0	0	0	0	0	0
1	1	5	417	61	5	3	0	0	0	0	0	0	0	0	0	0
1	1	5	418	62	3	1	1	0	1	1	0	326.264	0	0	0	0
1	1	5	419	63	4	5	0	0	0	0	0	0	0	0	0	0
1	1	5	420	64	1	2	0	1	1	1	0	410.574	0	0	0	0
1	1	5	421	65	5	4	1	0	1	1	0	516.112	0	0	0	0
1	1	5	422	66	6	6	0	0	0	0	0	0	0	0	0	0
1	1	5	423	67	2	3	0	0	0	0	0	0	0	0	0	0
1	1	5	424	68	5	1	0	0	0	0	0	0	0	0	0	0
1	1	5	425	69	3	5	1	0	1	1	0	347.912	0	0	0	0
1	1	5	426	70	4	2	0	0	0	0	0	0	0	0	0	0
1	1	5	427	71	1	4	0	0	0	0	0	0	0	0	0	0
1	1	5	428	72	5	6	0	0	0	0	0	0	0	0	0	0
1	1	5	429	73	6	3	0	0	0	0	0	0	0	0	0	0
1	1	5	430	74	2	1	1	0	1	1	0	333.519	0	0	0	0
1	1	5	431	75	5	5	0	0	0	0	0	0	0	0	0	0
1	1	5	432	76	3	2	0	1	1	1	0	289.831	0	0	0	0
1	1	5	433	77	4	4	0	0	0	0	0	0	0	0	0	0
1	1	5	434	78	1	6	0	0	0	0	0	0	0	0	0	0
1	1	5	435	79	5	3	0	0	0	0	0	0	0	0	0	0
1	1	5	436	80	6	1	0	1	1	1	0	377.55	0	0	0	0
1	1	5	437	81	2	5	0	0	0	0	0	0	0	0	0	0
1	1	5	438	82	5	2	1	0	1	1	0	365.013	0	0	0	0
1	1	5	439	83	3	4	0	0	0	0	0	0	0	0	0	0
1	1	5	440	84	4	6	0	0	0	0	0	0	0	0	0	0
1	1	5	441	85	1	3	0	0	0	0	0	0	0	0	0	0
1	1	5	442	86	5	1	0	0	0	0	0	0	0	0	0	0
1	1	5	443	87	6	5	0	1	1	1	0	367.106	0	0	0	0
1	1	5	444	88	2	2	0	0	0	0	0	0	0	0	0	0
1	1	5	445	89	5	4	0	0	0	0	0	0	0	0	0	0
1	1	6	446	1	3	1	0	0	0	0	0	0	0	0	0	0
1	1	6	447	2	4	5	0	0	0	0	0	0	0	0	0	0
1	1	6	448	3	1	2	0	1	1	1	0	332.976	0	0	0	0
1	1	6	449	4	5	4	0	0	0	0	0	0	0	0	0	0
1	1	6	450	5	6	6	1	0	1	1	0	320.406	0	0	0	0
1	1	6	451	6	2	3	0	0	0	0	0	0	0	0	0	0
1	1	6	452	7	5	1	0	1	1	1	0	372.675	0	0	0	0
1	1	6	453	8	3	5	0	0	0	0	0	0	0	0	0	0
1	1	6	454	9	4	2	1	0	1	1	0	328.201	0	0	0	0
1	1	6	455	10	1	4	0	0	0	0	0	0	0	0	0	0
1	1	6	456	11	5	6	0	1	1	1	0	364.448	0	0	0	0
1	1	6	457	12	6	3	0	0	0	0	0	0	0	0	0	0
1	1	6	458	13	2	1	0	0	0	0	0	0	0	0	0	0
1	1	6	459	14	5	5	0	1	1	1	0	314.286	0	0	0	0
1	1	6	460	15	3	2	0	0	0	0	0	0	0	0	0	0
1	1	6	461	16	4	4	0	1	1	1	0	334.154	0	0	0	0
1	1	6	462	17	1	6	0	0	0	0	0	0	0	0	0	0
1	1	6	463	18	5	3	0	0	0	0	0	0	0	0	0	0
1	1	6	464	19	6	1	1	0	1	1	0	347.578	0	0	0	0
1	1	6	465	20	2	5	0	0	0	0	0	0	0	0	0	0
1	1	6	466	21	5	2	0	0	0	0	0	0	0	0	0	0
1	1	6	467	22	3	4	0	0	0	0	0	0	0	0	0	0
1	1	6	468	23	4	6	0	0	0	0	0	0	0	0	0	0
1	1	6	469	24	1	3	1	0	1	1	0	365.206	0	0	0	0
1	1	6	470	25	5	1	0	0	0	0	0	0	0	0	0	0
1	1	6	471	26	6	5	0	0	0	0	0	0	0	0	0	0
1	1	6	472	27	2	2	0	1	1	1	0	347.446	0	0	0	0
1	1	6	473	28	5	4	1	0	1	1	0	468.967	0	0	0	0
1	1	6	474	29	3	6	0	0	0	0	0	0	0	0	0	0
1	1	6	475	30	4	3	0	0	0	0	0	0	0	0	0	0
1	1	6	476	31	1	1	0	0	0	0	0	0	0	0	0	0
1	1	6	477	32	5	5	0	0	0	0	0	0	0	0	0	0
1	1	6	478	33	6	2	1	0	1	1	0	342.622	0	0	0	0
1	1	6	479	34	2	4	0	0	0	0	0	0	0	0	0	0
1	1	6	480	35	5	6	0	0	0	0	0	0	0	0	0	0
1	1	6	481	36	3	3	0	1	1	1	0	356.848	0	0	0	0
1	1	6	482	37	4	1	0	0	0	0	0	0	0	0	0	0
1	1	6	483	38	1	5	0	0	0	0	0	0	0	0	0	0
1	1	6	484	39	5	2	0	0	0	0	0	0	0	0	0	0
1	1	6	485	40	6	4	0	0	0	0	0	0	0	0	0	0
1	1	6	486	41	2	6	1	0	1	1	0	358.16	0	0	0	0
1	1	6	487	42	5	3	0	0	0	0	0	0	0	0	0	0
1	1	6	488	43	3	1	0	0	0	0	0	0	0	0	0	0
1	1	6	489	44	4	5	0	0	0	0	0	0	0	0	0	0
1	1	6	490	45	1	2	0	0	0	0	0	0	0	0	0	0
1	1	6	491	46	5	4	0	1	1	1	0	360.223	0	0	0	0
1	1	6	492	47	6	6	0	0	0	0	0	0	0	0	0	0
1	1	6	493	48	2	3	0	0	0	0	0	0	0	0	0	0
1	1	6	494	49	5	1	1	0	1	1	0	373.499	0	0	0	0
1	1	6	495	50	1	2	0	0	0	0	0	0	0	0	0	0
1	1	6	496	51	5	4	0	0	0	0	0	0	0	0	0	0
1	1	6	497	52	6	6	0	1	1	1	0	595.81	0	0	0	0
1	1	6	498	53	2	3	0	0	0	0	0	0	0	0	0	0
1	1	6	499	54	5	1	0	0	0	0	0	0	0	0	0	0
1	1	6	500	55	3	5	1	0	1	1	0	321.264	0	0	0	0
1	1	6	501	56	4	2	0	0	0	0	0	0	0	0	0	0
1	1	6	502	57	1	4	0	0	0	0	0	0	0	0	0	0
1	1	6	503	58	5	6	1	0	1	1	0	463.063	0	0	0	0
1	1	6	504	59	6	3	0	0	0	0	0	0	0	0	0	0
1	1	6	505	60	2	1	0	0	0	0	0	0	0	0	0	0
1	1	6	506	61	5	5	0	1	1	1	0	365.26	0	0	0	0
1	1	6	507	62	3	2	0	0	0	0	0	0	0	0	0	0
1	1	6	508	63	4	4	0	1	1	1	0	385.144	0	0	0	0
1	1	6	509	64	1	6	0	0	0	0	0	0	0	0	0	0
1	1	6	510	65	5	3	0	0	0	0	0	0	0	0	0	0
1	1	6	511	66	6	1	0	1	1	1	0	398.955	0	0	0	0
1	1	6	512	67	2	5	1	0	1	1	0	408.502	0	0	0	0
1	1	6	513	68	5	2	1	0	1	1	0	338.468	0	0	0	0
1	1	6	514	69	3	4	0	0	0	0	0	0	0	0	0	0
1	1	6	515	70	4	6	0	1	1	1	0	358.695	0	0	0	0
1	1	6	516	71	1	3	0	0	0	0	0	0	0	0	0	0
1	1	6	517	72	5	1	0	0	0	0	0	0	0	0	0	0
1	1	6	518	73	6	5	0	0	0	0	0	0	0	0	0	0
1	1	6	519	74	2	2	0	0	0	0	0	0	0	0	0	0
1	1	6	520	75	5	4	0	1	1	1	0	344.383	0	0	0	0
1	1	6	521	76	3	6	1	0	1	1	0	385.925	0	0	0	0
1	1	6	522	77	4	3	0	0	0	0	0	0	0	0	0	0
1	1	6	523	78	1	1	0	0	0	0	0	0	0	0	0	0
1	1	6	524	79	5	5	0	0	0	0	0	0	0	0	0	0
1	1	6	525	80	6	2	1	0	1	1	0	313.708	0	0	0	0
1	1	6	526	81	2	4	0	0	0	0	0	0	0	0	0	0
1	1	6	527	82	5	6	0	0	0	0	0	0	0	0	0	0
1	1	6	528	83	3	3	0	1	1	1	0	375.903	0	0	0	0
1	1	6	529	84	4	1	0	0	0	0	0	0	0	0	0	0
1	1	6	530	85	1	5	0	0	0	0	0	0	0	0	0	0
1	1	6	531	86	5	2	0	1	1	1	0	357.745	0	0	0	0
1	1	6	532	87	6	4	0	0	0	0	0	0	0	0	0	0
1	1	6	533	88	2	6	0	0	0	0	0	0	0	0	0	0
1	1	6	534	89	5	3	1	0	1	1	0	371.118	0	0	0	0
1	1	7	535	1	4	4	0	0	0	0	0	0	0	0	0	0
1	1	7	536	2	1	6	0	1	1	1	0	418.469	0	0	0	0
1	1	7	537	3	5	3	0	0	0	0	0	0	0	0	0	0
1	1	7	538	4	6	1	0	0	0	0	0	0	0	0	0	0
1	1	7	539	5	2	5	0	1	1	1	0	352.32	0	0	0	0
1	1	7	540	6	5	2	0	0	0	0	0	0	0	0	0	0
1	1	7	541	7	3	4	0	0	0	0	0	0	0	0	0	0
1	1	7	542	8	4	6	0	0	0	0	0	0	0	0	0	0
1	1	7	543	9	1	3	0	0	0	0	0	0	0	0	0	0
1	1	7	544	10	5	1	1	0	1	1	0	465.557	0	0	0	0
1	1	7	545	11	6	5	0	0	0	0	0	0	0	0	0	0
1	1	7	546	12	2	2	0	1	1	1	0	341.824	0	0	0	0
1	1	7	547	13	5	4	0	0	0	0	0	0	0	0	0	0
1	1	7	548	14	3	6	1	0	1	1	0	297.294	0	0	0	0
1	1	7	549	15	4	3	0	0	0	0	0	0	0	0	0	0
1	1	7	550	16	1	1	0	0	0	0	0	0	0	0	0	0
1	1	7	551	17	5	5	0	0	0	0	0	0	0	0	0	0
1	1	7	552	18	6	2	0	0	0	0	0	0	0	0	0	0
1	1	7	553	19	2	4	0	1	1	1	0	411.377	0	0	0	0
1	1	7	554	20	5	6	1	0	1	1	0	436.935	0	0	0	0
1	1	7	555	21	3	3	0	0	0	0	0	0	0	0	0	0
1	1	7	556	22	4	1	0	0	0	0	0	0	0	0	0	0
1	1	7	557	23	1	5	0	1	1	1	0	403.124	0	0	0	0
1	1	7	558	24	5	2	0	0	0	0	0	0	0	0	0	0
1	1	7	559	25	6	4	0	0	0	0	0	0	0	0	0	0
1	1	7	560	26	2	6	0	0	0	0	0	0	0	0	0	0
1	1	7	561	27	5	3	0	1	1	1	0	378.919	0	0	0	0
1	1	7	562	28	3	1	0	0	0	0	0	0	0	0	0	0
1	1	7	563	29	4	5	0	0	0	0	0	0	0	0	0	0
1	1	7	564	30	1	2	1	0	1	1	0	328.284	0	0	0	0
1	1	7	565	31	5	4	0	0	0	0	0	0	0	0	0	0
1	1	7	566	32	6	6	0	0	0	0	0	0	0	0	0	0
1	1	7	567	33	2	3	0	0	0	0	0	0	0	0	0	0
1	1	7	568	34	5	1	0	1	1	1	0	352.429	0	0	0	0
1	1	7	569	35	3	5	1	0	1	1	0	377.981	0	0	0	0
1	1	7	570	36	4	2	0	0	0	0	0	0	0	0	0	0
1	1	7	571	37	1	4	0	0	0	0	0	0	0	0	0	0
1	1	7	572	38	5	6	0	0	0	0	0	0	0	0	0	0
1	1	7	573	39	6	3	0	0	0	0	0	0	0	0	0	0
1	1	7	574	40	3	5	0	1	1	1	0	396.046	0	0	0	0
1	1	7	575	41	4	2	0	0	0	0	0	0	0	0	0	0
1	1	7	576	42	1	4	0	0	0	0	0	0	0	0	0	0
1	1	7	577	43	5	6	0	0	0	0	0	0	0	0	0	0
1	1	7	578	44	6	3	0	0	0	0	0	0	0	0	0	0
1	1	7	579	45	2	1	1	0	1	1	0	477.313	0	0	0	0
1	1	7	580	46	5	5	0	0	0	0	0	0	0	0	0	0
1	1	7	581	47	3	2	0	0	0	0	0	0	0	0	0	0
1	1	7	582	48	4	4	0	0	0	0	0	0	0	0	0	0
1	1	7	583	49	1	6	0	0	0	0	0	0	0	0	0	0
1	1	7	584	50	5	3	0	0	0	0	0	0	0	0	0	0
1	1	7	585	51	6	1	0	0	0	0	0	0	0	0	0	0
1	1	7	586	52	2	5	0	0	0	0	0	0	0	0	0	0
1	1	7	587	53	5	2	0	1	1	1	0	397.235	0	0	0	0
1	1	7	588	54	3	4	0	0	0	0	0	0	0	0	0	0
1	1	7	589	55	4	6	1	0	1	1	0	400.696	0	0	0	0
1	1	7	590	56	1	3	0	1	1	1	0	411.035	0	0	0	0
1	1	7	591	57	5	1	0	0	0	0	0	0	0	0	0	0
1	1	7	592	58	6	5	0	0	0	0	0	0	0	0	0	0
1	1	7	593	59	2	2	0	0	0	0	0	0	0	0	0	0
1	1	7	594	60	5	4	1	0	1	1	0	370.375	0	0	0	0
1	1	7	595	61	3	6	0	0	0	0	0	0	0	0	0	0
1	1	7	596	62	4	3	1	0	1	1	0	438.251	0	0	0	0
1	1	7	597	63	1	1	0	0	0	0	0	0	0	0	0	0
1	1	7	598	64	5	5	0	0	0	0	0	0	0	0	0	0
1	1	7	599	65	6	2	0	0	0	0	0	0	0	0	0	0
1	1	7	600	66	2	4	0	0	0	0	0	0	0	0	0	0
1	1	7	601	67	5	6	0	1	1	1	0	376.373	0	0	0	0
1	1	7	602	68	3	3	0	0	0	0	0	0	0	0	0	0
1	1	7	603	69	4	1	1	0	1	1	0	347.837	0	0	0	0
1	1	7	604	70	1	5	0	0	0	0	0	0	0	0	0	0
1	1	7	605	71	5	2	0	0	0	0	0	0	0	0	0	0
1	1	7	606	72	6	4	0	0	0	0	0	0	0	0	0	0
1	1	7	607	73	2	6	0	0	0	0	0	0	0	0	0	0
1	1	7	608	74	5	3	1	0	1	1	0	333.519	0	0	0	0
1	1	7	609	75	3	1	0	0	0	0	0	0	0	0	0	0
1	1	7	610	76	4	5	0	0	0	0	0	0	0	0	0	0
1	1	7	611	77	1	2	0	1	1	1	0	395.684	0	0	0	0
1	1	7	612	78	5	4	0	0	0	0	0	0	0	0	0	0
1	1	7	613	79	6	6	0	1	1	1	0	367.605	0	0	0	0
1	1	7	614	80	2	3	1	0	1	1	0	409.132	0	0	0	0
1	1	7	615	81	5	1	0	0	0	0	0	0	0	0	0	0
1	1	7	616	82	3	5	0	0	0	0	0	0	0	0	0	0
1	1	7	617	83	4	2	0	1	1	1	0	375.312	0	0	0	0
1	1	7	618	84	1	4	0	0	0	0	0	0	0	0	0	0
1	1	7	619	85	5	6	0	0	0	0	0	0	0	0	0	0
1	1	7	620	86	6	3	0	0	0	0	0	0	0	0	0	0
1	1	7	621	87	2	1	0	0	0	0	0	0	0	0	0	0
1	1	7	622	88	5	5	0	1	1	1	0	393.016	0	0	0	0
1	1	7	623	89	3	2	0	0	0	0	0	0	0	0	0	0
2	1	1	1	1	3	1	1	0	1	0	1	0	1	0	1	0
2	1	1	2	2	5	2	0	0	0	0	0	0	0	0	0	0
2	1	1	3	3	2	5	0	0	0	0	0	0	0	0	0	0
2	1	1	4	4	4	3	0	1	1	0	1	0	1	0	0	1
2	1	1	5	5	6	4	0	0	0	0	0	0	0	0	0	0
2	1	1	6	6	3	1	0	0	0	0	0	0	0	0	0	0
2	1	1	7	7	1	5	0	1	1	0	1	0	1	0	0	1
2	1	1	8	8	5	6	0	0	0	0	0	0	0	0	0	0
2	1	1	9	9	2	2	0	0	0	0	0	0	0	0	0	0
2	1	1	10	10	4	5	0	0	0	0	0	0	0	0	0	0
2	1	1	11	11	6	3	0	1	1	1	0	372.249	0	0	0	0
2	1	1	12	12	3	4	0	0	0	0	0	0	0	0	0	0
2	1	1	13	13	1	1	0	0	0	0	0	0	0	0	0	0
2	1	1	14	14	5	5	0	0	0	0	0	0	0	0	0	0
2	1	1	15	15	2	6	0	0	0	0	0	0	0	0	0	0
2	1	1	16	16	4	2	1	0	1	1	0	389.242	0	0	0	0
2	1	1	17	17	6	5	0	1	1	0	1	0	1	0	0	1
2	1	1	18	18	3	3	0	0	0	0	0	0	0	0	0	0
2	1	1	19	19	1	4	0	0	0	0	0	0	0	0	0	0
2	1	1	20	20	5	1	0	0	0	0	0	0	0	0	0	0
2	1	1	21	21	2	5	0	0	0	0	0	0	0	0	0	0
2	1	1	22	22	4	6	0	1	1	1	0	374.981	0	0	0	0
2	1	1	23	23	6	2	0	0	0	0	0	0	0	0	0	0
2	1	1	24	24	3	5	0	0	0	0	0	0	0	0	0	0
2	1	1	25	25	1	3	0	0	0	0	0	0	0	0	0	0
2	1	1	26	26	5	4	0	0	0	0	0	0	0	0	0	0
2	1	1	27	27	2	1	1	0	1	1	0	424.024	0	0	0	0
2	1	1	28	28	4	5	0	0	0	0	0	0	0	0	0	0
2	1	1	29	29	6	6	0	0	0	0	0	0	0	0	0	0
2	1	1	30	30	3	2	0	0	0	0	0	0	0	0	0	0
2	1	1	31	31	1	5	1	0	1	1	0	575.527	0	0	0	0
2	1	1	32	32	5	3	0	0	0	0	0	0	0	0	0	0
2	1	1	33	33	2	4	0	0	0	0	0	0	0	0	0	0
2	1	1	34	34	4	1	0	0	0	0	0	0	0	0	0	0
2	1	1	35	35	6	5	1	0	1	1	0	375.174	0	0	0	0
2	1	1	36	36	3	6	0	0	0	0	0	0	0	0	0	0
2	1	1	37	37	1	2	0	0	0	0	0	0	0	0	0	0
2	1	1	38	38	5	5	1	0	1	1	0	644.808	0	0	0	0
2	1	1	39	39	2	3	0	0	0	0	0	0	0	0	0	0
2	1	1	40	40	4	4	0	0	0	0	0	0	0	0	0	0
2	1	1	41	41	6	1	0	0	0	0	0	0	0	0	0	0
2	1	1	42	42	3	5	0	1	1	1	0	348.748	0	0	0	0
2	1	1	43	43	1	6	0	0	0	0	0	0	0	0	0	0
2	1	1	44	44	5	2	0	0	0	0	0	0	0	0	0	0
2	1	1	45	45	2	5	0	0	0	0	0	0	0	0	0	0
2	1	1	46	46	4	3	1	0	1	1	0	323.924	0	0	0	0
2	1	1	47	47	6	4	0	0	0	0	0	0	0	0	0	0
2	1	1	48	48	3	1	0	0	0	0	0	0	0	0	0	0
2	1	1	49	49	1	5	0	0	0	0	0	0	0	0	0	0
2	1	1	50	50	5	6	0	0	0	0	0	0	0	0	0	0
2	1	1	51	51	2	2	0	1	1	1	0	293.689	0	0	0	0
2	1	1	52	52	4	5	0	0	0	0	0	0	0	0	0	0
2	1	1	53	53	6	3	0	0	0	0	0	0	0	0	0	0
2	1	1	54	54	3	4	0	0	0	0	0	0	0	0	0	0
2	1	1	55	55	1	1	1	0	1	1	0	476.869	0	0	0	0
2	1	1	56	56	5	5	0	0	0	0	0	0	0	0	0	0
2	1	1	57	57	2	6	0	1	1	1	0	385.077	0	0	0	0
2	1	1	58	58	4	2	0	0	0	0	0	0	0	0	0	0
2	1	1	59	59	6	5	1	0	1	1	0	420.438	0	0	0	0
2	1	1	60	60	3	3	0	0	0	0	0	0	0	0	0	0
2	1	1	61	61	1	4	0	0	0	0	0	0	0	0	0	0
2	1	1	62	62	5	1	0	1	1	1	0	402.532	0	0	0	0
2	1	1	63	63	2	5	0	0	0	0	0	0	0	0	0	0
2	1	1	64	64	4	6	1	0	1	1	0	357.891	0	0	0	0
2	1	1	65	65	6	2	0	0	0	0	0	0	0	0	0	0
2	1	1	66	66	3	5	1	0	1	1	0	393.683	0	0	0	0
2	1	1	67	67	1	3	0	1	1	1	0	579.985	0	0	0	0
2	1	1	68	68	5	4	0	0	0	0	0	0	0	0	0	0
2	1	1	69	69	2	1	0	0	0	0	0	0	0	0	0	0
2	1	1	70	70	4	5	0	0	0	0	0	0	0	0	0	0
2	1	1	71	71	6	6	0	0	0	0	0	0	0	0	0	0
2	1	1	72	72	3	2	0	1	1	1	0	485.482	0	0	0	0
2	1	1	73	73	1	5	0	0	0	0	0	0	0	0	0	0
2	1	1	74	74	5	3	0	0	0	0	0	0	0	0	0	0
2	1	1	75	75	2	4	1	0	1	1	0	386.721	0	0	0	0
2	1	1	76	76	4	1	0	0	0	0	0	0	0	0	0	0
2	1	1	77	77	6	5	1	0	1	1	0	406.488	0	0	0	0
2	1	1	78	78	3	6	0	0	0	0	0	0	0	0	0	0
2	1	1	79	79	1	2	0	0	0	0	0	0	0	0	0	0
2	1	1	80	80	5	5	1	0	1	1	0	404.18	0	0	0	0
2	1	1	81	81	2	3	0	0	0	0	0	0	0	0	0	0
2	1	1	82	82	4	4	0	0	0	0	0	0	0	0	0	0
2	1	1	83	83	6	1	0	1	1	1	0	386.29	0	0	0	0
2	1	1	84	84	3	5	0	1	1	1	0	428.123	0	0	0	0
2	1	1	85	85	1	6	0	0	0	0	0	0	0	0	0	0
2	1	1	86	86	5	2	0	1	1	1	0	383.906	0	0	0	0
2	1	1	87	87	2	5	0	0	0	0	0	0	0	0	0	0
2	1	1	88	88	4	3	0	0	0	0	0	0	0	0	0	0
2	1	1	89	89	6	4	0	0	0	0	0	0	0	0	0	0
2	1	2	90	1	1	5	0	0	0	0	0	0	0	0	0	0
2	1	2	91	2	5	6	0	0	0	0	0	0	0	0	0	0
2	1	2	92	3	2	2	0	1	1	1	0	364.66	0	0	0	0
2	1	2	93	4	4	5	0	0	0	0	0	0	0	0	0	0
2	1	2	94	5	6	3	0	0	0	0	0	0	0	0	0	0
2	1	2	95	6	3	4	1	0	1	1	0	441.911	0	0	0	0
2	1	2	96	7	1	1	0	0	0	0	0	0	0	0	0	0
2	1	2	97	8	5	5	0	1	1	1	0	382.094	0	0	0	0
2	1	2	98	9	2	6	0	0	0	0	0	0	0	0	0	0
2	1	2	99	10	4	2	0	0	0	0	0	0	0	0	0	0
2	1	2	100	11	6	5	1	0	1	1	0	411.305	0	0	0	0
2	1	2	101	12	3	3	0	0	0	0	0	0	0	0	0	0
2	1	2	102	13	1	4	0	1	1	1	0	431.475	0	0	0	0
2	1	2	103	14	5	1	0	0	0	0	0	0	0	0	0	0
2	1	2	104	15	2	5	0	0	0	0	0	0	0	0	0	0
2	1	2	105	16	4	6	0	0	0	0	0	0	0	0	0	0
2	1	2	106	17	6	2	0	0	0	0	0	0	0	0	0	0
2	1	2	107	18	3	5	0	0	0	0	0	0	0	0	0	0
2	1	2	108	19	1	3	1	0	1	1	0	522.453	0	0	0	0
2	1	2	109	20	5	4	0	1	1	1	0	548.757	0	0	0	0
2	1	2	110	21	2	1	0	0	0	0	0	0	0	0	0	0
2	1	2	111	22	4	5	0	1	1	1	0	392.544	0	0	0	0
2	1	2	112	23	6	6	0	0	0	0	0	0	0	0	0	0
2	1	2	113	24	3	2	0	0	0	0	0	0	0	0	0	0
2	1	2	114	25	1	5	0	0	0	0	0	0	0	0	0	0
2	1	2	115	26	5	3	0	0	0	0	0	0	0	0	0	0
2	1	2	116	27	2	4	1	0	1	1	0	473.533	0	0	0	0
2	1	2	117	28	4	1	0	0	0	0	0	0	0	0	0	0
2	1	2	118	29	6	5	0	0	0	0	0	0	0	0	0	0
2	1	2	119	30	3	6	0	0	0	1	1	423.266	0	1	0	0
2	1	2	120	31	1	2	1	0	1	1	0	599.09	0	0	0	0
2	1	2	121	32	5	5	0	0	0	0	0	0	0	0	0	0
2	1	2	122	33	2	3	0	0	0	0	0	0	0	0	0	0
2	1	2	123	34	4	4	0	0	0	0	0	0	0	0	0	0
2	1	2	124	35	6	1	0	1	1	1	0	479.079	0	0	0	0
2	1	2	125	36	3	5	0	0	0	0	0	0	0	0	0	0
2	1	2	126	37	1	6	0	0	0	0	0	0	0	0	0	0
2	1	2	127	38	5	2	1	0	1	1	0	652.278	0	0	0	0
2	1	2	128	39	2	5	0	0	0	0	0	0	0	0	0	0
2	1	2	129	40	4	3	1	0	1	1	0	496.14	0	0	0	0
2	1	2	130	41	6	4	0	0	0	0	0	0	0	0	0	0
2	1	2	131	42	3	1	0	1	1	1	0	500.294	0	0	0	0
2	1	2	132	43	1	5	0	0	0	0	0	0	0	0	0	0
2	1	2	133	44	5	6	0	0	0	0	0	0	0	0	0	0
2	1	2	134	45	2	2	0	0	0	0	0	0	0	0	0	0
2	1	2	135	46	4	5	0	1	1	1	0	411.88	0	0	0	0
2	1	2	136	47	6	3	0	0	0	0	0	0	0	0	0	0
2	1	2	137	48	3	4	0	0	0	0	0	0	0	0	0	0
2	1	2	138	49	1	1	1	0	1	1	0	537.162	0	0	0	0
2	1	2	139	50	5	5	0	0	0	0	0	0	0	0	0	0
2	1	2	140	51	2	6	0	0	0	0	0	0	0	0	0	0
2	1	2	141	52	4	2	1	0	1	1	0	454.841	0	0	0	0
2	1	2	142	53	6	5	0	0	0	0	0	0	0	0	0	0
2	1	2	143	54	3	3	0	0	0	0	0	0	0	0	0	0
2	1	2	144	55	1	4	0	0	0	0	0	0	0	0	0	0
2	1	2	145	56	5	1	1	0	1	1	0	590.397	0	0	0	0
2	1	2	146	57	2	5	0	0	0	0	0	0	0	0	0	0
2	1	2	147	58	4	6	0	1	1	1	0	450.548	0	0	0	0
2	1	2	148	59	6	2	0	0	0	0	0	0	0	0	0	0
2	1	2	149	60	3	5	0	0	0	0	0	0	0	0	0	0
2	1	2	150	61	1	3	1	0	1	1	0	319.887	0	0	0	0
2	1	2	151	62	5	4	0	0	0	0	0	0	0	0	0	0
2	1	2	152	63	2	1	0	0	0	0	0	0	0	0	0	0
2	1	2	153	64	4	5	0	0	0	0	0	0	0	0	0	0
2	1	2	154	65	6	6	0	1	1	1	0	391.845	0	0	0	0
2	1	2	155	66	3	2	0	0	0	0	0	0	0	0	0	0
2	1	2	156	67	1	5	0	0	0	0	0	0	0	0	0	0
2	1	2	157	68	5	3	1	0	1	1	0	357.073	0	0	0	0
2	1	2	158	69	2	4	1	0	1	1	0	558.973	0	0	0	0
2	1	2	159	70	4	1	0	1	1	1	0	441.305	0	0	0	0
2	1	2	160	71	6	5	0	0	0	0	0	0	0	0	0	0
2	1	2	161	72	3	6	1	0	1	1	0	364.647	0	0	0	0
2	1	2	162	73	1	2	0	0	0	0	0	0	0	0	0	0
2	1	2	163	74	5	5	0	1	1	1	0	400.848	0	0	0	0
2	1	2	164	75	2	3	1	0	1	1	0	474.327	0	0	0	0
2	1	2	165	76	4	4	0	1	1	1	0	356.675	0	0	0	0
2	1	2	166	77	6	1	0	0	0	0	0	0	0	0	0	0
2	1	2	167	78	3	5	0	0	0	0	0	0	0	0	0	0
2	1	2	168	79	1	6	0	0	0	0	0	0	0	0	0	0
2	1	2	169	80	5	2	0	1	1	1	0	412.181	0	0	0	0
2	1	2	170	81	2	5	0	0	0	0	0	0	0	0	0	0
2	1	2	171	82	4	3	1	0	1	1	0	383.58	0	0	0	0
2	1	2	172	83	6	4	0	0	0	0	0	0	0	0	0	0
2	1	2	173	84	3	1	1	0	1	1	0	419.4	0	0	0	0
2	1	2	174	85	1	5	0	0	0	0	0	0	0	0	0	0
2	1	2	175	86	5	6	1	0	1	1	0	407.123	0	0	0	0
2	1	2	176	87	2	2	0	0	0	0	0	0	0	0	0	0
2	1	2	177	88	4	5	0	0	0	0	0	0	0	0	0	0
2	1	2	178	89	6	3	0	0	0	0	0	0	0	0	0	0
2	1	3	179	1	2	5	0	1	1	1	0	568.474	0	0	0	0
2	1	3	180	2	4	3	0	0	0	0	0	0	0	0	0	0
2	1	3	181	3	6	4	0	0	0	0	0	0	0	0	0	0
2	1	3	182	4	3	1	1	0	1	1	0	421.837	0	0	0	0
2	1	3	183	5	1	5	0	0	0	0	0	0	0	0	0	0
2	1	3	184	6	5	6	0	1	1	1	0	410.033	0	0	0	0
2	1	3	185	7	2	2	0	0	0	0	0	0	0	0	0	0
2	1	3	186	8	4	5	0	0	0	0	0	0	0	0	0	0
2	1	3	187	9	6	3	0	0	0	0	0	0	0	0	0	0
2	1	3	188	10	3	4	0	0	0	0	0	0	0	0	0	0
2	1	3	189	11	1	1	0	1	1	1	0	459.501	0	0	0	0
2	1	3	190	12	5	5	0	0	0	0	0	0	0	0	0	0
2	1	3	191	13	2	6	0	0	0	0	0	0	0	0	0	0
2	1	3	192	14	4	2	0	0	0	0	0	0	0	0	0	0
2	1	3	193	15	3	4	0	0	0	0	0	0	0	0	0	0
2	1	3	194	16	1	1	0	0	0	0	0	0	0	0	0	0
2	1	3	195	17	5	5	0	0	0	0	0	0	0	0	0	0
2	1	3	196	18	2	6	0	0	0	0	0	0	0	0	0	0
2	1	3	197	19	4	2	1	0	1	1	0	426.17	0	0	0	0
2	1	3	198	20	6	5	0	1	1	1	0	452.49	0	0	0	0
2	1	3	199	21	3	3	0	0	0	0	0	0	0	0	0	0
2	1	3	200	22	1	4	0	1	1	1	0	456.238	0	0	0	0
2	1	3	201	23	5	1	0	0	0	0	0	0	0	0	0	0
2	1	3	202	24	2	5	0	0	0	0	0	0	0	0	0	0
2	1	3	203	25	4	6	0	0	0	0	0	0	0	0	0	0
2	1	3	204	26	6	2	0	1	1	1	0	415.847	0	0	0	0
2	1	3	205	27	3	5	0	0	0	0	0	0	0	0	0	0
2	1	3	206	28	1	3	0	1	1	1	0	355.629	0	0	0	0
2	1	3	207	29	5	4	0	0	0	0	0	0	0	0	0	0
2	1	3	208	30	2	1	1	0	1	1	0	470.971	0	0	0	0
2	1	3	209	31	4	5	0	0	0	0	0	0	0	0	0	0
2	1	3	210	32	6	6	0	0	0	0	0	0	0	0	0	0
2	1	3	211	33	3	2	0	0	0	0	0	0	0	0	0	0
2	1	3	212	34	1	5	1	0	1	1	0	478.557	0	0	0	0
2	1	3	213	35	5	3	0	0	0	0	0	0	0	0	0	0
2	1	3	214	36	2	4	0	0	0	0	0	0	0	0	0	0
2	1	3	215	37	4	1	0	1	1	1	0	428.611	0	0	0	0
2	1	3	216	38	6	5	1	0	1	1	0	454.097	0	0	0	0
2	1	3	217	39	3	6	0	0	0	0	0	0	0	0	0	0
2	1	3	218	40	1	2	0	1	1	1	0	394.331	0	0	0	0
2	1	3	219	41	5	5	0	1	1	1	0	372.175	0	0	0	0
2	1	3	220	42	2	3	0	0	0	0	0	0	0	0	0	0
2	1	3	221	43	4	4	1	0	1	1	0	423.614	0	0	0	0
2	1	3	222	44	6	1	0	0	0	0	0	0	0	0	0	0
2	1	3	223	45	3	5	0	0	0	0	0	0	0	0	0	0
2	1	3	224	46	1	6	0	0	0	0	0	0	0	0	0	0
2	1	3	225	47	5	2	0	0	0	0	0	0	0	0	0	0
2	1	3	226	48	2	5	1	0	1	1	0	329.024	0	0	0	0
2	1	3	227	49	4	3	0	0	0	0	0	0	0	0	0	0
2	1	3	228	50	6	4	0	0	0	0	0	0	0	0	0	0
2	1	3	229	51	3	1	0	0	0	0	0	0	0	0	0	0
2	1	3	230	52	1	5	1	0	1	1	0	544.627	0	0	0	0
2	1	3	231	53	5	6	0	0	0	0	0	0	0	0	0	0
2	1	3	232	54	2	2	0	1	1	1	0	404.779	0	0	0	0
2	1	3	233	55	4	5	0	0	0	0	0	0	0	0	0	0
2	1	3	234	56	6	3	1	0	1	1	0	408.158	0	0	0	0
2	1	3	235	57	3	4	0	0	0	0	0	0	0	0	0	0
2	1	3	236	58	1	1	0	0	0	0	0	0	0	0	0	0
2	1	3	237	59	5	5	0	0	0	0	0	0	0	0	0	0
2	1	3	238	60	2	6	0	1	1	1	0	448.145	0	0	0	0
2	1	3	239	61	4	2	0	0	0	0	0	0	0	0	0	0
2	1	3	240	62	6	5	0	0	0	0	0	0	0	0	0	0
2	1	3	241	63	3	3	1	0	1	1	0	365.411	0	0	0	0
2	1	3	242	64	1	4	0	0	0	0	0	0	0	0	0	0
2	1	3	243	65	5	1	0	0	0	0	0	0	0	0	0	0
2	1	3	244	66	2	5	0	1	1	1	0	379.486	0	0	0	0
2	1	3	245	67	4	6	0	0	0	0	0	0	0	0	0	0
2	1	3	246	68	6	2	0	1	1	1	0	415.321	0	0	0	0
2	1	3	247	69	3	5	0	0	0	0	0	0	0	0	0	0
2	1	3	248	70	1	3	0	0	0	0	0	0	0	0	0	0
2	1	3	249	71	5	4	0	1	1	1	0	492.989	0	0	0	0
2	1	3	250	72	2	1	0	0	0	0	0	0	0	0	0	0
2	1	3	251	73	4	5	0	0	0	0	0	0	0	0	0	0
2	1	3	252	74	6	6	0	0	0	0	0	0	0	0	0	0
2	1	3	253	75	3	2	0	0	0	0	0	0	0	0	0	0
2	1	3	254	76	1	5	0	0	0	0	0	0	0	0	0	0
2	1	3	255	77	5	3	1	0	1	1	0	615.887	0	0	0	0
2	1	3	256	78	2	4	0	1	1	1	0	418.205	0	0	0	0
2	1	3	257	79	4	1	0	0	0	0	0	0	0	0	0	0
2	1	3	258	80	6	5	1	0	1	1	0	405.568	0	0	0	0
2	1	3	259	81	3	6	0	0	0	0	0	0	0	0	0	0
2	1	3	260	82	1	2	0	0	0	0	0	0	0	0	0	0
2	1	3	261	83	5	5	0	1	1	1	0	419.634	0	0	0	0
2	1	3	262	84	2	3	0	0	0	0	0	0	0	0	0	0
2	1	3	263	85	4	4	0	1	1	1	0	407.424	0	0	0	0
2	1	3	264	86	6	1	0	0	0	0	0	0	0	0	0	0
2	1	3	265	87	3	5	0	0	0	0	0	0	0	0	0	0
2	1	3	266	88	1	6	1	0	1	1	0	708.678	0	0	0	0
2	1	3	267	89	5	2	0	0	0	0	0	0	0	0	0	0
2	1	4	268	1	5	2	0	0	0	0	0	0	0	0	0	0
2	1	4	269	2	2	5	1	0	1	1	0	514.084	0	0	0	0
2	1	4	270	3	4	3	0	0	0	0	0	0	0	0	0	0
2	1	4	271	4	6	4	0	1	1	1	0	454.272	0	0	0	0
2	1	4	272	5	3	1	0	0	0	0	0	0	0	0	0	0
2	1	4	273	6	1	5	0	0	0	0	0	0	0	0	0	0
2	1	4	274	7	5	6	0	1	1	1	0	483.982	0	0	0	0
2	1	4	275	8	2	2	0	0	0	0	0	0	0	0	0	0
2	1	4	276	9	4	5	0	0	0	1	1	903.279	0	1	0	0
2	1	4	277	10	6	3	0	0	0	0	0	0	0	0	0	0
2	1	4	278	11	3	4	0	0	0	0	0	0	0	0	0	0
2	1	4	279	12	1	1	0	1	1	1	0	491.367	0	0	0	0
2	1	4	280	13	5	5	0	0	0	0	0	0	0	0	0	0
2	1	4	281	14	2	6	0	0	0	0	0	0	0	0	0	0
2	1	4	282	15	4	2	0	0	0	0	0	0	0	0	0	0
2	1	4	283	16	6	5	1	0	1	1	0	466.534	0	0	0	0
2	1	4	284	17	3	3	0	0	0	0	0	0	0	0	0	0
2	1	4	285	18	1	4	0	0	0	0	0	0	0	0	0	0
2	1	4	286	19	5	1	0	0	0	0	0	0	0	0	0	0
2	1	4	287	20	2	5	0	0	0	0	0	0	0	0	0	0
2	1	4	288	21	6	5	1	0	1	1	0	420.032	0	0	0	0
2	1	4	289	22	3	3	0	0	0	0	0	0	0	0	0	0
2	1	4	290	23	1	4	0	0	0	0	0	0	0	0	0	0
2	1	4	291	24	5	1	0	0	0	0	0	0	0	0	0	0
2	1	4	292	25	2	5	0	0	0	0	0	0	0	0	0	0
2	1	4	293	26	4	6	0	0	0	0	0	0	0	0	0	0
2	1	4	294	27	6	2	0	0	0	0	0	0	0	0	0	0
2	1	4	295	28	3	5	1	0	1	1	0	505.284	0	0	0	0
2	1	4	296	29	1	3	0	0	0	0	0	0	0	0	0	0
2	1	4	297	30	5	4	0	0	0	0	0	0	0	0	0	0
2	1	4	298	31	2	1	0	1	1	1	0	1159.33	0	0	0	0
2	1	4	299	32	4	5	0	0	0	0	0	0	0	0	0	0
2	1	4	300	33	6	6	0	1	1	1	0	475.121	0	0	0	0
2	1	4	301	34	3	2	1	0	1	1	0	644.563	0	0	0	0
2	1	4	302	35	1	5	0	0	0	0	0	0	0	0	0	0
2	1	4	303	36	5	3	0	1	1	1	0	424.8	0	0	0	0
2	1	4	304	37	2	4	0	0	0	0	0	0	0	0	0	0
2	1	4	305	38	4	1	0	0	0	0	0	0	0	0	0	0
2	1	4	306	39	6	5	1	0	1	1	0	534.027	0	0	0	0
2	1	4	307	40	3	6	0	0	0	0	0	0	0	0	0	0
2	1	4	308	41	1	2	0	0	0	0	0	0	0	0	0	0
2	1	4	309	42	5	5	0	1	1	1	0	484.128	0	0	0	0
2	1	4	310	43	2	3	0	1	1	1	0	542.039	0	0	0	0
2	1	4	311	44	4	4	0	0	0	0	0	0	0	0	0	0
2	1	4	312	45	6	1	0	0	0	0	0	0	0	0	0	0
2	1	4	313	46	3	5	1	0	1	1	0	395.272	0	0	0	0
2	1	4	314	47	1	6	0	0	0	0	0	0	0	0	0	0
2	1	4	315	48	5	2	0	0	0	0	0	0	0	0	0	0
2	1	4	316	49	2	5	1	0	1	1	0	473.005	0	0	0	0
2	1	4	317	50	4	3	0	0	0	0	0	0	0	0	0	0
2	1	4	318	51	6	4	0	1	1	0	1	0	1	0	0	1
2	1	4	319	52	3	1	0	0	0	0	0	0	0	0	0	0
2	1	4	320	53	1	5	0	0	0	0	0	0	0	0	0	0
2	1	4	321	54	5	6	0	0	0	0	0	0	0	0	0	0
2	1	4	322	55	2	2	0	0	0	0	0	0	0	0	0	0
2	1	4	323	56	4	5	1	0	1	1	0	516.186	0	0	0	0
2	1	4	324	57	6	3	0	0	0	0	0	0	0	0	0	0
2	1	4	325	58	3	4	0	0	0	0	0	0	0	0	0	0
2	1	4	326	59	1	1	0	0	0	0	0	0	0	0	0	0
2	1	4	327	60	5	5	0	1	1	1	0	460.171	0	0	0	0
2	1	4	328	61	2	6	0	1	1	1	0	454.066	0	0	0	0
2	1	4	329	62	4	2	0	0	0	0	0	0	0	0	0	0
2	1	4	330	63	6	5	1	0	1	1	0	377.416	0	0	0	0
2	1	4	331	64	3	3	0	0	0	0	0	0	0	0	0	0
2	1	4	332	65	1	4	1	0	1	1	0	429.186	0	0	0	0
2	1	4	333	66	5	1	0	0	0	0	0	0	0	0	0	0
2	1	4	334	67	2	5	0	0	0	0	0	0	0	0	0	0
2	1	4	335	68	4	6	0	0	0	0	0	0	0	0	0	0
2	1	4	336	69	6	2	0	1	1	1	0	405.167	0	0	0	0
2	1	4	337	70	3	5	0	0	0	0	0	0	0	0	0	0
2	1	4	338	71	1	3	0	0	0	0	0	0	0	0	0	0
2	1	4	339	72	5	4	1	0	1	1	0	802.425	0	0	0	0
2	1	4	340	73	2	1	0	1	1	1	0	556.743	0	0	0	0
2	1	4	341	74	4	5	0	0	0	0	0	0	0	0	0	0
2	1	4	342	75	6	6	0	0	0	0	0	0	0	0	0	0
2	1	4	343	76	3	2	1	0	1	1	0	393.97	0	0	0	0
2	1	4	344	77	1	5	0	0	0	0	0	0	0	0	0	0
2	1	4	345	78	5	3	0	1	1	1	0	430.197	0	0	0	0
2	1	4	346	79	2	4	0	0	0	0	0	0	0	0	0	0
2	1	4	347	80	4	1	0	0	0	0	0	0	0	0	0	0
2	1	4	348	81	6	5	0	0	0	0	0	0	0	0	0	0
2	1	4	349	82	3	6	0	1	1	1	0	405.79	0	0	0	0
2	1	4	350	83	1	2	0	0	0	0	0	0	0	0	0	0
2	1	4	351	84	5	5	0	0	0	0	0	0	0	0	0	0
2	1	4	352	85	2	3	0	0	0	0	0	0	0	0	0	0
2	1	4	353	86	4	4	0	0	0	0	0	0	0	0	0	0
2	1	4	354	87	6	1	0	1	1	1	0	439.262	0	0	0	0
2	1	4	355	88	3	5	0	0	0	0	0	0	0	0	0	0
2	1	4	356	89	1	6	0	0	0	0	0	0	0	0	0	0
2	1	5	357	1	4	3	1	0	1	1	0	560.583	0	0	0	0
2	1	5	358	2	6	4	0	0	0	0	0	0	0	0	0	0
2	1	5	359	3	3	1	0	1	1	1	0	452.751	0	0	0	0
2	1	5	360	4	1	5	0	0	0	0	0	0	0	0	0	0
2	1	5	361	5	5	6	0	0	0	0	0	0	0	0	0	0
2	1	5	362	6	2	2	0	0	0	0	0	0	0	0	0	0
2	1	5	363	7	4	5	0	0	0	0	0	0	0	0	0	0
2	1	5	364	8	6	3	0	1	1	1	0	390.24	0	0	0	0
2	1	5	365	9	3	4	0	0	0	0	0	0	0	0	0	0
2	1	5	366	10	1	1	0	0	0	0	0	0	0	0	0	0
2	1	5	367	11	5	5	0	0	0	0	0	0	0	0	0	0
2	1	5	368	12	2	6	0	1	1	1	0	397.781	0	0	0	0
2	1	5	369	13	4	2	0	0	0	0	0	0	0	0	0	0
2	1	5	370	14	6	5	0	0	0	0	0	0	0	0	0	0
2	1	5	371	15	3	3	0	1	1	1	0	459.455	0	0	0	0
2	1	5	372	16	1	4	1	0	1	1	0	564.95	0	0	0	0
2	1	5	373	17	5	1	0	0	0	0	0	0	0	0	0	0
2	1	5	374	18	2	5	0	0	0	0	0	0	0	0	0	0
2	1	5	375	19	4	6	1	0	1	1	0	386.656	0	0	0	0
2	1	5	376	20	6	2	0	0	0	0	0	0	0	0	0	0
2	1	5	377	21	3	5	0	0	0	0	0	0	0	0	0	0
2	1	5	378	22	1	3	0	1	1	1	0	496.676	0	0	0	0
2	1	5	379	23	5	4	0	0	0	0	0	0	0	0	0	0
2	1	5	380	24	2	1	1	0	1	1	0	388.08	0	0	0	0
2	1	5	381	25	4	5	0	1	1	1	0	462.346	0	0	0	0
2	1	5	382	26	6	6	0	0	0	0	0	0	0	0	0	0
2	1	5	383	27	3	2	0	0	0	0	0	0	0	0	0	0
2	1	5	384	28	1	5	0	0	0	0	0	0	0	0	0	0
2	1	5	385	29	5	3	0	1	1	1	0	453.89	0	0	0	0
2	1	5	386	30	2	4	0	0	0	0	0	0	0	0	0	0
2	1	5	387	31	4	1	0	0	0	0	0	0	0	0	0	0
2	1	5	388	32	6	5	0	0	0	0	0	0	0	0	0	0
2	1	5	389	33	3	6	0	0	0	0	0	0	0	0	0	0
2	1	5	390	34	1	2	0	1	1	1	0	503.352	0	0	0	0
2	1	5	391	35	5	5	0	0	0	0	0	0	0	0	0	0
2	1	5	392	36	2	3	1	0	1	1	0	490.726	0	0	0	0
2	1	5	393	37	4	4	0	0	0	0	0	0	0	0	0	0
2	1	5	394	38	6	1	0	0	0	0	0	0	0	0	0	0
2	1	5	395	39	3	5	0	0	0	0	0	0	0	0	0	0
2	1	5	396	40	1	6	1	0	1	1	0	770.287	0	0	0	0
2	1	5	397	41	5	2	0	0	0	0	0	0	0	0	0	0
2	1	5	398	42	2	5	0	1	1	1	0	438.477	0	0	0	0
2	1	5	399	43	4	3	0	0	0	0	0	0	0	0	0	0
2	1	5	400	44	6	4	0	0	0	0	0	0	0	0	0	0
2	1	5	401	45	3	1	0	0	0	0	0	0	0	0	0	0
2	1	5	402	46	1	5	0	0	0	0	0	0	0	0	0	0
2	1	5	403	47	5	6	1	0	1	0	1	0	1	0	1	0
2	1	5	404	48	2	2	0	0	0	0	0	0	0	0	0	0
2	1	5	405	49	4	5	0	0	0	0	0	0	0	0	0	0
2	1	5	406	50	6	3	0	0	0	0	0	0	0	0	0	0
2	1	5	407	51	3	4	0	0	0	0	0	0	0	0	0	0
2	1	5	408	52	1	1	0	1	1	1	0	623.325	0	0	0	0
2	1	5	409	53	5	5	0	0	0	0	0	0	0	0	0	0
2	1	5	410	54	2	6	0	0	0	0	0	0	0	0	0	0
2	1	5	411	55	4	2	0	0	0	0	0	0	0	0	0	0
2	1	5	412	56	6	5	0	0	0	0	0	0	0	0	0	0
2	1	5	413	57	3	3	1	0	1	1	0	448.382	0	0	0	0
2	1	5	414	58	1	4	0	0	0	0	0	0	0	0	0	0
2	1	5	415	59	5	1	0	0	0	0	0	0	0	0	0	0
2	1	5	416	60	2	5	0	0	0	0	0	0	0	0	0	0
2	1	5	417	61	4	6	1	0	1	1	0	391.988	0	0	0	0
2	1	5	418	62	6	2	0	0	0	0	0	0	0	0	0	0
2	1	5	419	63	3	5	0	0	0	0	0	0	0	0	0	0
2	1	5	420	64	1	3	0	0	0	0	0	0	0	0	0	0
2	1	5	421	65	5	4	1	0	1	1	0	591.534	0	0	0	0
2	1	5	422	66	4	6	0	0	0	0	0	0	0	0	0	0
2	1	5	423	67	6	2	0	1	1	1	0	435.726	0	0	0	0
2	1	5	424	68	3	5	0	0	0	0	0	0	0	0	0	0
2	1	5	425	69	1	3	0	0	0	0	0	0	0	0	0	0
2	1	5	426	70	5	4	0	1	1	1	0	465.448	0	0	0	0
2	1	5	427	71	2	1	1	0	1	1	0	538.857	0	0	0	0
2	1	5	428	72	4	5	1	0	1	1	0	372.807	0	0	0	0
2	1	5	429	73	6	6	0	0	0	0	0	0	0	0	0	0
2	1	5	430	74	3	2	0	0	0	0	0	0	0	0	0	0
2	1	5	431	75	1	5	1	0	1	1	0	578.484	0	0	0	0
2	1	5	432	76	5	3	0	0	0	0	0	0	0	0	0	0
2	1	5	433	77	2	4	0	0	0	0	0	0	0	0	0	0
2	1	5	434	78	4	1	0	0	0	0	0	0	0	0	0	0
2	1	5	435	79	6	5	0	1	1	1	0	506.438	0	0	0	0
2	1	5	436	80	3	6	0	1	1	1	0	420.337	0	0	0	0
2	1	5	437	81	1	2	1	0	1	1	0	637.839	0	0	0	0
2	1	5	438	82	5	5	0	0	0	0	0	0	0	0	0	0
2	1	5	439	83	2	3	0	1	1	1	0	417.987	0	0	0	0
2	1	5	440	84	4	4	0	0	0	0	0	0	0	0	0	0
2	1	5	441	85	6	1	0	0	0	0	0	0	0	0	0	0
2	1	5	442	86	3	5	1	0	1	1	0	383.255	0	0	0	0
2	1	5	443	87	1	6	0	0	0	0	0	0	0	0	0	0
2	1	5	444	88	5	2	0	0	0	0	0	0	0	0	0	0
2	1	5	445	89	2	5	0	0	0	0	0	0	0	0	0	0
2	1	6	446	1	2	1	0	0	0	0	0	0	0	0	0	0
2	1	6	447	2	4	5	1	0	1	1	0	441.94	0	0	0	0
2	1	6	448	3	6	6	0	0	0	0	0	0	0	0	0	0
2	1	6	449	4	3	2	0	0	0	0	0	0	0	0	0	0
2	1	6	450	5	1	5	0	1	1	1	0	456.03	0	0	0	0
2	1	6	451	6	2	1	0	0	0	0	0	0	0	0	0	0
2	1	6	452	7	4	5	0	0	0	0	0	0	0	0	0	0
2	1	6	453	8	6	6	1	0	1	1	0	405.313	0	0	0	0
2	1	6	454	9	3	2	0	0	0	0	0	0	0	0	0	0
2	1	6	455	10	1	5	0	0	0	0	0	0	0	0	0	0
2	1	6	456	11	5	3	0	1	1	1	0	419.45	0	0	0	0
2	1	6	457	12	2	4	0	0	0	0	0	0	0	0	0	0
2	1	6	458	13	4	1	0	0	0	0	0	0	0	0	0	0
2	1	6	459	14	6	5	0	1	1	1	0	417.082	0	0	0	0
2	1	6	460	15	3	6	0	0	0	0	0	0	0	0	0	0
2	1	6	461	16	1	2	0	0	0	0	0	0	0	0	0	0
2	1	6	462	17	5	5	1	0	1	1	0	462.389	0	0	0	0
2	1	6	463	18	2	3	0	0	0	0	0	0	0	0	0	0
2	1	6	464	19	4	4	1	0	1	1	0	482.138	0	0	0	0
2	1	6	465	20	6	1	0	0	0	0	0	0	0	0	0	0
2	1	6	466	21	3	5	0	0	0	0	0	0	0	0	0	0
2	1	6	467	22	1	6	1	0	1	1	0	399.837	0	0	0	0
2	1	6	468	23	5	2	0	1	1	1	0	474.093	0	0	0	0
2	1	6	469	24	2	5	0	1	1	1	0	419.968	0	0	0	0
2	1	6	470	25	4	3	0	0	0	0	0	0	0	0	0	0
2	1	6	471	26	6	4	1	0	1	1	0	407.391	0	0	0	0
2	1	6	472	27	3	1	0	0	0	0	0	0	0	0	0	0
2	1	6	473	28	1	5	0	0	0	0	0	0	0	0	0	0
2	1	6	474	29	5	6	0	0	0	0	0	0	0	0	0	0
2	1	6	475	30	2	2	0	0	0	0	0	0	0	0	0	0
2	1	6	476	31	4	5	1	0	1	1	0	312.83	0	0	0	0
2	1	6	477	32	6	3	0	1	1	1	0	483.112	0	0	0	0
2	1	6	478	33	3	4	0	0	0	0	0	0	0	0	0	0
2	1	6	479	34	1	1	0	0	0	0	0	0	0	0	0	0
2	1	6	480	35	5	5	0	0	0	0	0	0	0	0	0	0
2	1	6	481	36	2	6	0	1	1	1	0	442.714	0	0	0	0
2	1	6	482	37	4	2	0	0	0	0	0	0	0	0	0	0
2	1	6	483	38	6	5	0	0	0	0	0	0	0	0	0	0
2	1	6	484	39	3	3	1	0	1	1	0	423.96	0	0	0	0
2	1	6	485	40	1	4	0	0	0	0	0	0	0	0	0	0
2	1	6	486	41	5	1	0	0	0	0	0	0	0	0	0	0
2	1	6	487	42	2	5	1	0	1	1	0	405.652	0	0	0	0
2	1	6	488	43	4	6	0	0	0	0	0	0	0	0	0	0
2	1	6	489	44	6	2	0	0	0	0	0	0	0	0	0	0
2	1	6	490	45	3	5	0	1	1	1	0	435.714	0	0	0	0
2	1	6	491	46	1	3	0	0	0	0	0	0	0	0	0	0
2	1	6	492	47	5	4	0	0	0	0	0	0	0	0	0	0
2	1	6	493	48	2	1	1	0	1	1	0	544.983	0	0	0	0
2	1	6	494	49	4	5	0	0	0	0	0	0	0	0	0	0
2	1	6	495	50	6	6	0	1	1	1	0	469.176	0	0	0	0
2	1	6	496	51	3	2	0	0	0	0	0	0	0	0	0	0
2	1	6	497	52	1	5	1	0	1	1	0	520.559	0	0	0	0
2	1	6	498	53	5	3	0	0	0	0	0	0	0	0	0	0
2	1	6	499	54	2	4	0	1	1	1	0	444.73	0	0	0	0
2	1	6	500	55	4	1	0	0	0	0	0	0	0	0	0	0
2	1	6	501	56	6	5	1	0	1	1	0	448.103	0	0	0	0
2	1	6	502	57	3	6	0	0	0	0	0	0	0	0	0	0
2	1	6	503	58	1	2	0	0	0	0	0	0	0	0	0	0
2	1	6	504	59	5	5	1	0	1	1	0	413.872	0	0	0	0
2	1	6	505	60	2	3	0	0	0	0	0	0	0	0	0	0
2	1	6	506	61	4	4	1	0	1	1	0	401.627	0	0	0	0
2	1	6	507	62	6	1	0	0	0	0	0	0	0	0	0	0
2	1	6	508	63	3	5	0	0	0	0	0	0	0	0	0	0
2	1	6	509	64	1	6	0	1	1	1	0	463.661	0	0	0	0
2	1	6	510	65	5	2	0	0	0	0	0	0	0	0	0	0
2	1	6	511	66	2	5	0	0	0	0	0	0	0	0	0	0
2	1	6	512	67	4	3	0	0	0	0	0	0	0	0	0	0
2	1	6	513	68	6	4	0	0	0	0	0	0	0	0	0	0
2	1	6	514	69	3	1	0	1	1	1	0	433.102	0	0	0	0
2	1	6	515	70	1	5	0	0	0	0	0	0	0	0	0	0
2	1	6	516	71	5	6	0	0	0	0	0	0	0	0	0	0
2	1	6	517	72	2	2	1	0	1	1	0	430.427	0	0	0	0
2	1	6	518	73	4	5	0	1	1	1	0	408.678	0	0	0	0
2	1	6	519	74	6	3	0	0	0	0	0	0	0	0	0	0
2	1	6	520	75	3	4	0	0	0	0	0	0	0	0	0	0
2	1	6	521	76	1	1	0	0	0	0	0	0	0	0	0	0
2	1	6	522	77	5	5	0	0	0	0	0	0	0	0	0	0
2	1	6	523	78	2	6	0	1	1	1	0	394.148	0	0	0	0
2	1	6	524	79	4	2	0	0	0	0	0	0	0	0	0	0
2	1	6	525	80	6	5	0	0	0	0	0	0	0	0	0	0
2	1	6	526	81	3	3	1	0	1	1	0	423.432	0	0	0	0
2	1	6	527	82	1	4	0	0	0	0	0	0	0	0	0	0
2	1	6	528	83	5	1	0	0	0	0	0	0	0	0	0	0
2	1	6	529	84	2	5	0	0	0	0	0	0	0	0	0	0
2	1	6	530	85	4	6	0	0	0	0	0	0	0	0	0	0
2	1	6	531	86	6	2	0	1	1	1	0	473.261	0	0	0	0
2	1	6	532	87	3	5	0	0	0	0	0	0	0	0	0	0
2	1	6	533	88	1	3	0	0	0	0	0	0	0	0	0	0
2	1	6	534	89	5	4	0	0	0	0	0	0	0	0	0	0
2	1	7	535	1	4	5	0	1	1	1	0	537.084	0	0	0	0
2	1	7	536	2	6	3	0	0	0	0	0	0	0	0	0	0
2	1	7	537	3	3	4	0	1	1	1	0	412.866	0	0	0	0
2	1	7	538	4	1	1	0	0	0	0	0	0	0	0	0	0
2	1	7	539	5	5	5	0	0	0	0	0	0	0	0	0	0
2	1	7	540	6	2	6	0	0	0	0	0	0	0	0	0	0
2	1	7	541	7	4	2	0	0	0	0	0	0	0	0	0	0
2	1	7	542	8	6	5	1	0	1	1	0	525.899	0	0	0	0
2	1	7	543	9	3	3	0	0	0	0	0	0	0	0	0	0
2	1	7	544	10	1	4	0	1	1	1	0	402.12	0	0	0	0
2	1	7	545	11	5	1	0	0	0	0	0	0	0	0	0	0
2	1	7	546	12	2	5	0	0	0	0	0	0	0	0	0	0
2	1	7	547	13	4	6	0	0	0	0	0	0	0	0	0	0
2	1	7	548	14	6	2	0	0	0	0	0	0	0	0	0	0
2	1	7	549	15	3	5	0	1	1	1	0	451.56	0	0	0	0
2	1	7	550	16	1	3	0	0	0	0	0	0	0	0	0	0
2	1	7	551	17	5	4	0	0	0	0	0	0	0	0	0	0
2	1	7	552	18	2	1	1	0	1	1	0	512.847	0	0	0	0
2	1	7	553	19	4	5	0	0	0	0	0	0	0	0	0	0
2	1	7	554	20	6	6	1	0	1	1	0	452.669	0	0	0	0
2	1	7	555	21	3	2	0	1	1	1	0	542.928	0	0	0	0
2	1	7	556	22	1	5	0	0	0	0	0	0	0	0	0	0
2	1	7	557	23	5	3	0	0	0	0	0	0	0	0	0	0
2	1	7	558	24	2	4	1	0	1	1	0	460.247	0	0	0	0
2	1	7	559	25	4	1	0	0	0	0	0	0	0	0	0	0
2	1	7	560	26	6	5	0	0	0	0	0	0	0	0	0	0
2	1	7	561	27	3	6	0	0	0	0	0	0	0	0	0	0
2	1	7	562	28	1	2	0	0	0	0	0	0	0	0	0	0
2	1	7	563	29	5	5	1	0	1	1	0	413.701	0	0	0	0
2	1	7	564	30	2	3	0	0	0	0	0	0	0	0	0	0
2	1	7	565	31	4	4	0	0	0	0	0	0	0	0	0	0
2	1	7	566	32	6	1	1	0	1	1	0	411.336	0	0	0	0
2	1	7	567	33	3	5	0	0	0	0	0	0	0	0	0	0
2	1	7	568	34	1	6	0	0	0	0	0	0	0	0	0	0
2	1	7	569	35	5	2	1	0	1	1	0	681.043	0	0	0	0
2	1	7	570	36	2	5	0	0	0	0	0	0	0	0	0	0
2	1	7	571	37	4	3	0	0	0	0	0	0	0	0	0	0
2	1	7	572	38	6	4	0	0	0	0	0	0	0	0	0	0
2	1	7	573	39	3	1	0	0	0	0	0	0	0	0	0	0
2	1	7	574	40	1	5	0	1	1	1	0	426.865	0	0	0	0
2	1	7	575	41	5	6	0	0	0	0	0	0	0	0	0	0
2	1	7	576	42	2	2	1	0	1	1	0	478.264	0	0	0	0
2	1	7	577	43	4	5	0	0	0	0	0	0	0	0	0	0
2	1	7	578	44	6	3	0	1	1	1	0	370.438	0	0	0	0
2	1	7	579	45	3	4	0	0	0	0	0	0	0	0	0	0
2	1	7	580	46	1	1	0	0	0	0	0	0	0	0	0	0
2	1	7	581	47	5	5	0	0	0	0	0	0	0	0	0	0
2	1	7	582	48	2	6	0	0	0	0	0	0	0	0	0	0
2	1	7	583	49	4	2	1	0	1	1	0	419.519	0	0	0	0
2	1	7	584	50	6	5	0	1	1	1	0	445.822	0	0	0	0
2	1	7	585	51	3	3	0	0	0	0	0	0	0	0	0	0
2	1	7	586	52	1	4	0	0	0	1	1	449.2	0	1	0	0
2	1	7	587	53	5	1	1	0	1	1	0	1600.96	0	0	0	0
2	1	7	588	54	2	5	0	0	0	0	0	0	0	0	0	0
2	1	7	589	55	4	6	0	0	0	0	0	0	0	0	0	0
2	1	7	590	56	6	2	0	0	0	0	0	0	0	0	0	0
2	1	7	591	57	3	5	1	0	1	1	0	392.61	0	0	0	0
2	1	7	592	58	1	3	0	0	0	0	0	0	0	0	0	0
2	1	7	593	59	5	4	0	0	0	0	0	0	0	0	0	0
2	1	7	594	60	2	1	0	1	1	1	0	438.611	0	0	0	0
2	1	7	595	61	4	5	0	0	0	0	0	0	0	0	0	0
2	1	7	596	62	6	6	0	0	0	0	0	0	0	0	0	0
2	1	7	597	63	3	2	0	0	0	0	0	0	0	0	0	0
2	1	7	598	64	1	5	1	0	1	1	0	381.86	0	0	0	0
2	1	7	599	65	5	3	0	1	1	1	0	440.087	0	0	0	0
2	1	7	600	66	2	4	0	0	0	0	0	0	0	0	0	0
2	1	7	601	67	4	1	0	0	0	0	0	0	0	0	0	0
2	1	7	602	68	6	5	0	0	0	0	0	0	0	0	0	0
2	1	7	603	69	3	6	0	0	0	0	0	0	0	0	0	0
2	1	7	604	70	5	3	1	0	1	1	0	441.192	0	0	0	0
2	1	7	605	71	2	4	0	0	0	0	0	0	0	0	0	0
2	1	7	606	72	4	1	0	0	0	0	0	0	0	0	0	0
2	1	7	607	73	6	5	0	0	0	0	0	0	0	0	0	0
2	1	7	608	74	3	6	0	0	0	0	0	0	0	0	0	0
2	1	7	609	75	1	2	0	1	1	1	0	619.042	0	0	0	0
2	1	7	610	76	5	5	0	0	0	0	0	0	0	0	0	0
2	1	7	611	77	2	3	0	0	0	0	0	0	0	0	0	0
2	1	7	612	78	4	4	0	0	0	0	0	0	0	0	0	0
2	1	7	613	79	6	1	0	0	0	0	0	0	0	0	0	0
2	1	7	614	80	3	5	0	0	0	0	0	0	0	0	0	0
2	1	7	615	81	1	6	0	0	0	0	0	0	0	0	0	0
2	1	7	616	82	5	2	0	0	0	0	0	0	0	0	0	0
2	1	7	617	83	2	5	1	0	1	1	0	489.754	0	0	0	0
2	1	7	618	84	4	3	0	0	0	0	0	0	0	0	0	0
2	1	7	619	85	6	4	0	1	1	1	0	413.92	0	0	0	0
2	1	7	620	86	3	1	1	0	1	1	0	471.48	0	0	0	0
2	1	7	621	87	1	5	0	0	0	0	0	0	0	0	0	0
2	1	7	622	88	5	6	0	0	0	0	0	0	0	0	0	0
2	1	7	623	89	2	2	0	0	0	0	0	0	0	0	0	0
3	2	1	1	1	1	3	0	1	1	0	1	0	1	0	0	1
3	2	1	2	2	2	5	0	0	0	0	0	0	0	0	0	0
3	2	1	3	3	5	2	0	0	0	0	0	0	0	0	0	0
3	2	1	4	4	3	4	1	0	1	1	0	475.036	0	0	0	0
3	2	1	5	5	4	6	0	0	0	0	0	0	0	0	0	0
3	2	1	6	6	1	3	0	0	0	0	0	0	0	0	0	0
3	2	1	7	7	5	1	1	0	1	1	0	904.692	0	0	0	0
3	2	1	8	8	6	5	0	0	0	0	0	0	0	0	0	0
3	2	1	9	9	2	2	0	0	0	0	0	0	0	0	0	0
3	2	1	10	10	5	4	0	0	0	0	0	0	0	0	0	0
3	2	1	11	11	3	6	1	0	1	1	0	528.31	0	0	0	0
3	2	1	12	12	4	3	0	0	0	0	0	0	0	0	0	0
3	2	1	13	13	1	1	0	0	0	0	0	0	0	0	0	0
3	2	1	14	14	5	5	0	0	0	0	0	0	0	0	0	0
3	2	1	15	15	6	2	0	0	0	0	0	0	0	0	0	0
3	2	1	16	16	2	4	0	1	1	1	0	738.184	0	0	0	0
3	2	1	17	17	5	6	1	0	1	0	1	0	1	0	1	0
3	2	1	18	18	3	3	0	0	0	0	0	0	0	0	0	0
3	2	1	19	19	4	1	0	0	0	0	0	0	0	0	0	0
3	2	1	20	20	1	5	0	0	0	0	0	0	0	0	0	0
3	2	1	21	21	5	2	0	0	0	0	0	0	0	0	0	0
3	2	1	22	22	6	4	1	0	1	1	0	371.187	0	0	0	0
3	2	1	23	23	2	6	0	0	0	0	0	0	0	0	0	0
3	2	1	24	24	5	3	0	0	0	0	0	0	0	0	0	0
3	2	1	25	25	3	1	0	0	0	0	0	0	0	0	0	0
3	2	1	26	26	4	5	0	0	0	0	0	0	0	0	0	0
3	2	1	27	27	1	2	0	1	1	1	0	437.08	0	0	0	0
3	2	1	28	28	5	4	0	0	0	0	0	0	0	0	0	0
3	2	1	29	29	6	6	0	0	0	0	0	0	0	0	0	0
3	2	1	30	30	2	3	0	0	0	0	0	0	0	0	0	0
3	2	1	31	31	5	1	0	1	1	1	0	332.748	0	0	0	0
3	2	1	32	32	3	5	0	0	0	0	0	0	0	0	0	0
3	2	1	33	33	4	2	0	0	0	0	0	0	0	0	0	0
3	2	1	34	34	1	4	0	0	0	0	0	0	0	0	0	0
3	2	1	35	35	5	6	0	1	1	1	0	452.355	0	0	0	0
3	2	1	36	36	6	3	0	0	0	0	0	0	0	0	0	0
3	2	1	37	37	2	1	0	0	0	0	0	0	0	0	0	0
3	2	1	38	38	5	5	0	1	1	1	0	386.104	0	0	0	0
3	2	1	39	39	3	2	0	0	0	0	0	0	0	0	0	0
3	2	1	40	40	4	4	0	0	0	0	0	0	0	0	0	0
3	2	1	41	41	1	6	0	0	0	0	0	0	0	0	0	0
3	2	1	42	42	5	3	1	0	1	0	1	0	1	0	1	0
3	2	1	43	43	6	1	0	0	0	0	0	0	0	0	0	0
3	2	1	44	44	2	5	0	0	0	0	0	0	0	0	0	0
3	2	1	45	45	5	2	0	0	0	0	0	0	0	0	0	0
3	2	1	46	46	3	4	0	1	1	1	0	455.25	0	0	0	0
3	2	1	47	47	4	6	0	0	0	0	0	0	0	0	0	0
3	2	1	48	48	1	3	0	0	0	0	0	0	0	0	0	0
3	2	1	49	49	5	1	0	0	0	0	0	0	0	0	0	0
3	2	1	50	50	6	5	0	0	0	0	0	0	0	0	0	0
3	2	1	51	51	2	2	1	0	1	1	0	488.401	0	0	0	0
3	2	1	52	52	5	4	0	0	0	0	0	0	0	0	0	0
3	2	1	53	53	3	6	0	0	0	0	0	0	0	0	0	0
3	2	1	54	54	4	3	0	0	0	0	0	0	0	0	0	0
3	2	1	55	55	1	1	0	1	1	1	0	464.4	0	0	0	0
3	2	1	56	56	5	5	0	0	0	0	0	0	0	0	0	0
3	2	1	57	57	6	2	1	0	1	1	0	403.786	0	0	0	0
3	2	1	58	58	2	4	0	0	0	0	0	0	0	0	0	0
3	2	1	59	59	5	6	0	1	1	1	0	392.018	0	0	0	0
3	2	1	60	60	3	3	0	0	0	0	0	0	0	0	0	0
3	2	1	61	61	4	1	0	0	0	0	0	0	0	0	0	0
3	2	1	62	62	1	5	1	0	1	0	1	0	1	0	1	0
3	2	1	63	63	5	2	0	0	0	0	0	0	0	0	0	0
3	2	1	64	64	6	4	0	1	1	1	0	463.505	0	0	0	0
3	2	1	65	65	2	6	0	0	0	0	0	0	0	0	0	0
3	2	1	66	66	5	3	0	1	1	1	0	355.288	0	0	0	0
3	2	1	67	67	3	1	1	0	1	1	0	540.801	0	0	0	0
3	2	1	68	68	4	5	0	0	0	0	0	0	0	0	0	0
3	2	1	69	69	1	2	0	0	0	0	0	0	0	0	0	0
3	2	1	70	70	5	4	0	0	0	0	0	0	0	0	0	0
3	2	1	71	71	6	6	0	0	0	0	0	0	0	0	0	0
3	2	1	72	72	2	3	1	0	1	1	0	446.375	0	0	0	0
3	2	1	73	73	5	1	0	0	0	0	0	0	0	0	0	0
3	2	1	74	74	3	5	0	0	0	0	0	0	0	0	0	0
3	2	1	75	75	4	2	0	1	1	1	0	364.493	0	0	0	0
3	2	1	76	76	1	4	0	0	0	0	0	0	0	0	0	0
3	2	1	77	77	5	6	0	1	1	1	0	368.273	0	0	0	0
3	2	1	78	78	6	3	0	0	0	0	0	0	0	0	0	0
3	2	1	79	79	2	1	0	0	0	0	0	0	0	0	0	0
3	2	1	80	80	5	5	0	1	1	1	0	430.03	0	0	0	0
3	2	1	81	81	3	2	0	0	0	0	0	0	0	0	0	0
3	2	1	82	82	4	4	0	0	0	0	0	0	0	0	0	0
3	2	1	83	83	1	6	1	0	1	1	0	395.339	0	0	0	0
3	2	1	84	84	5	3	1	0	1	0	1	0	1	0	1	0
3	2	1	85	85	6	1	0	0	0	0	0	0	0	0	0	0
3	2	1	86	86	2	5	1	0	1	1	0	622.954	0	0	0	0
3	2	1	87	87	5	2	0	0	0	0	0	0	0	0	0	0
3	2	1	88	88	3	4	0	0	0	0	0	0	0	0	0	0
3	2	1	89	89	4	6	0	0	0	0	0	0	0	0	0	0
3	2	2	90	1	5	2	0	0	0	0	0	0	0	0	0	0
3	2	2	91	2	6	4	0	0	0	0	0	0	0	0	0	0
3	2	2	92	3	2	6	0	0	0	0	0	0	0	0	0	0
3	2	2	93	4	5	3	0	0	0	0	0	0	0	0	0	0
3	2	2	94	5	3	1	0	1	1	1	0	464.356	0	0	0	0
3	2	2	95	6	4	5	1	0	1	1	0	521.832	0	0	0	0
3	2	2	96	7	1	2	0	0	0	0	0	0	0	0	0	0
3	2	2	97	8	5	4	1	0	1	0	1	0	1	0	1	0
3	2	2	98	9	6	6	0	0	0	0	0	0	0	0	0	0
3	2	2	99	10	2	3	0	0	0	0	0	0	0	0	0	0
3	2	2	100	11	5	1	0	0	0	0	0	0	0	0	0	0
3	2	2	101	12	3	5	0	0	0	0	0	0	0	0	0	0
3	2	2	102	13	4	2	0	1	1	1	0	453.52	0	0	0	0
3	2	2	103	14	1	4	0	0	0	0	0	0	0	0	0	0
3	2	2	104	15	5	6	0	0	0	0	0	0	0	0	0	0
3	2	2	105	16	6	3	0	0	0	0	0	0	0	0	0	0
3	2	2	106	17	2	1	0	1	1	1	0	525.111	0	0	0	0
3	2	2	107	18	5	5	0	0	0	0	0	0	0	0	0	0
3	2	2	108	19	3	2	0	0	0	0	0	0	0	0	0	0
3	2	2	109	20	4	4	0	0	0	0	0	0	0	0	0	0
3	2	2	110	21	1	6	1	0	1	0	1	0	1	0	1	0
3	2	2	111	22	5	3	0	0	0	0	0	0	0	0	0	0
3	2	2	112	23	6	1	0	0	0	0	0	0	0	0	0	0
3	2	2	113	24	2	5	0	1	1	1	0	536.458	0	0	0	0
3	2	2	114	25	5	2	0	0	0	0	0	0	0	0	0	0
3	2	2	115	26	3	4	0	1	1	1	0	444.223	0	0	0	0
3	2	2	116	27	4	6	0	0	0	0	0	0	0	0	0	0
3	2	2	117	28	1	3	1	0	1	1	0	271.627	0	0	0	0
3	2	2	118	29	5	1	0	0	0	0	0	0	0	0	0	0
3	2	2	119	30	6	5	0	0	0	0	0	0	0	0	0	0
3	2	2	120	31	2	2	0	0	0	0	0	0	0	0	0	0
3	2	2	121	32	5	4	1	0	1	1	0	631.307	0	0	0	0
3	2	2	122	33	3	6	0	0	0	0	0	0	0	0	0	0
3	2	2	123	34	4	3	0	0	0	0	0	0	0	0	0	0
3	2	2	124	35	1	1	0	1	1	1	0	533.385	0	0	0	0
3	2	2	125	36	5	5	0	0	0	0	0	0	0	0	0	0
3	2	2	126	37	6	2	0	0	0	0	0	0	0	0	0	0
3	2	2	127	38	2	4	0	1	1	1	0	451.111	0	0	0	0
3	2	2	128	39	5	6	0	0	0	0	0	0	0	0	0	0
3	2	2	129	40	3	3	0	0	0	0	0	0	0	0	0	0
3	2	2	130	41	4	1	0	0	0	0	0	0	0	0	0	0
3	2	2	131	42	1	5	0	1	1	1	0	474.753	0	0	0	0
3	2	2	132	43	5	2	0	0	0	0	0	0	0	0	0	0
3	2	2	133	44	6	4	1	0	1	1	0	366.133	0	0	0	0
3	2	2	134	45	2	6	0	0	0	0	0	0	0	0	0	0
3	2	2	135	46	5	3	0	0	0	1	1	561.952	0	1	0	0
3	2	2	136	47	3	1	0	1	1	1	0	658.262	0	0	0	0
3	2	2	137	48	4	5	0	0	0	0	0	0	0	0	0	0
3	2	2	138	49	1	2	0	0	0	0	0	0	0	0	0	0
3	2	2	139	50	5	4	0	0	0	0	0	0	0	0	0	0
3	2	2	140	51	6	6	1	0	1	1	0	425.468	0	0	0	0
3	2	2	141	52	2	3	0	0	0	0	0	0	0	0	0	0
3	2	2	142	53	5	1	0	0	0	0	0	0	0	0	0	0
3	2	2	143	54	3	5	0	1	1	1	0	679.594	0	0	0	0
3	2	2	144	55	4	2	0	1	1	1	0	545.515	0	0	0	0
3	2	2	145	56	1	4	1	0	1	0	1	0	1	0	1	0
3	2	2	146	57	5	6	0	0	0	0	0	0	0	0	0	0
3	2	2	147	58	6	3	0	1	1	1	0	501.137	0	0	0	0
3	2	2	148	59	2	1	0	0	0	0	0	0	0	0	0	0
3	2	2	149	60	5	5	1	0	1	1	0	776.546	0	0	0	0
3	2	2	150	61	3	2	0	1	1	1	0	466.896	0	0	0	0
3	2	2	151	62	4	4	1	0	1	1	0	444.39	0	0	0	0
3	2	2	152	63	1	6	0	0	0	0	0	0	0	0	0	0
3	2	2	153	64	5	3	0	0	0	0	0	0	0	0	0	0
3	2	2	154	65	6	1	0	0	0	0	0	0	0	0	0	0
3	2	2	155	66	2	5	1	0	1	1	0	483.987	0	0	0	0
3	2	2	156	67	5	2	0	0	0	0	0	0	0	0	0	0
3	2	2	157	68	3	4	0	1	1	1	0	520.243	0	0	0	0
3	2	2	158	69	4	6	0	0	0	0	0	0	0	0	0	0
3	2	2	159	70	1	3	0	1	1	1	0	476.029	0	0	0	0
3	2	2	160	71	5	1	0	0	0	0	0	0	0	0	0	0
3	2	2	161	72	6	5	0	1	1	1	0	383.803	0	0	0	0
3	2	2	162	73	2	2	0	0	0	0	0	0	0	0	0	0
3	2	2	163	74	5	4	0	0	0	0	0	0	0	0	0	0
3	2	2	164	75	3	6	0	0	0	0	0	0	0	0	0	0
3	2	2	165	76	5	1	0	0	0	0	0	0	0	0	0	0
3	2	2	166	77	6	5	0	0	0	0	0	0	0	0	0	0
3	2	2	167	78	2	2	1	0	1	0	1	0	1	0	1	0
3	2	2	168	79	5	4	0	0	0	0	0	0	0	0	0	0
3	2	2	169	80	3	6	0	0	0	0	0	0	0	0	0	0
3	2	2	170	81	4	3	0	1	1	1	0	478.934	0	0	0	0
3	2	2	171	82	1	1	0	0	0	0	0	0	0	0	0	0
3	2	2	172	83	5	5	1	0	1	1	0	626.387	0	0	0	0
3	2	2	173	84	6	2	0	0	0	0	0	0	0	0	0	0
3	2	2	174	85	2	4	0	0	0	0	0	0	0	0	0	0
3	2	2	175	86	5	6	0	1	1	1	0	432.479	0	0	0	0
3	2	2	176	87	3	3	0	0	0	0	0	0	0	0	0	0
3	2	2	177	88	4	1	1	0	1	1	0	403.938	0	0	0	0
3	2	2	178	89	1	5	0	0	0	0	0	0	0	0	0	0
3	2	3	179	1	1	4	1	0	1	1	0	496.181	0	0	0	0
3	2	3	180	2	5	6	0	1	1	1	0	490.478	0	0	0	0
3	2	3	181	3	6	3	0	0	0	0	0	0	0	0	0	0
3	2	3	182	4	2	1	1	0	1	1	0	509.915	0	0	0	0
3	2	3	183	5	5	5	1	0	1	1	0	775.78	0	0	0	0
3	2	3	184	6	3	2	0	0	0	0	0	0	0	0	0	0
3	2	3	185	7	4	4	0	1	1	1	0	428.018	0	0	0	0
3	2	3	186	8	1	6	0	0	0	0	0	0	0	0	0	0
3	2	3	187	9	5	3	0	0	0	0	0	0	0	0	0	0
3	2	3	188	10	6	1	0	0	0	0	0	0	0	0	0	0
3	2	3	189	11	2	5	0	0	0	0	0	0	0	0	0	0
3	2	3	190	12	5	2	0	1	1	1	0	493.537	0	0	0	0
3	2	3	191	13	3	4	0	0	0	0	0	0	0	0	0	0
3	2	3	192	14	4	6	0	0	0	0	0	0	0	0	0	0
3	2	3	193	15	1	3	0	0	0	0	0	0	0	0	0	0
3	2	3	194	16	5	1	0	1	1	1	0	437.2	0	0	0	0
3	2	3	195	17	6	5	0	0	0	0	0	0	0	0	0	0
3	2	3	196	18	2	2	1	0	1	0	1	0	1	0	1	0
3	2	3	197	19	5	4	0	0	0	0	0	0	0	0	0	0
3	2	3	198	20	3	6	0	1	1	1	0	482.655	0	0	0	0
3	2	3	199	21	4	3	0	0	0	0	0	0	0	0	0	0
3	2	3	200	22	1	1	0	0	0	0	0	0	0	0	0	0
3	2	3	201	23	5	5	0	0	0	0	0	0	0	0	0	0
3	2	3	202	24	6	2	1	0	1	1	0	457.894	0	0	0	0
3	2	3	203	25	2	4	0	0	0	0	0	0	0	0	0	0
3	2	3	204	26	5	6	0	0	0	0	0	0	0	0	0	0
3	2	3	205	27	3	3	0	1	1	1	0	472.021	0	0	0	0
3	2	3	206	28	4	1	0	0	0	0	0	0	0	0	0	0
3	2	3	207	29	1	5	0	0	0	0	0	0	0	0	0	0
3	2	3	208	30	5	2	1	0	1	1	0	597.355	0	0	0	0
3	2	3	209	31	6	4	0	0	0	0	0	0	0	0	0	0
3	2	3	210	32	2	6	1	0	1	1	0	601.202	0	0	0	0
3	2	3	211	33	5	3	0	0	0	0	0	0	0	0	0	0
3	2	3	212	34	3	1	0	0	0	0	0	0	0	0	0	0
3	2	3	213	35	4	5	1	0	1	1	0	454.925	0	0	0	0
3	2	3	214	36	1	2	0	0	0	0	0	0	0	0	0	0
3	2	3	215	37	5	4	0	0	0	0	0	0	0	0	0	0
3	2	3	216	38	6	6	0	0	0	0	0	0	0	0	0	0
3	2	3	217	39	2	3	0	0	0	0	0	0	0	0	0	0
3	2	3	218	40	5	1	0	0	0	0	0	0	0	0	0	0
3	2	3	219	41	3	5	0	1	1	1	0	466.785	0	0	0	0
3	2	3	220	42	4	2	1	0	1	1	0	508.277	0	0	0	0
3	2	3	221	43	1	4	0	0	0	0	0	0	0	0	0	0
3	2	3	222	44	5	6	0	1	1	1	0	464.481	0	0	0	0
3	2	3	223	45	6	3	0	0	0	0	0	0	0	0	0	0
3	2	3	224	46	2	1	0	0	0	0	0	0	0	0	0	0
3	2	3	225	47	5	5	1	0	1	1	0	557.778	0	0	0	0
3	2	3	226	48	3	2	0	0	0	0	0	0	0	0	0	0
3	2	3	227	49	4	4	1	0	1	1	0	481.615	0	0	0	0
3	2	3	228	50	1	6	0	0	0	0	0	0	0	0	0	0
3	2	3	229	51	5	3	0	0	0	0	0	0	0	0	0	0
3	2	3	230	52	6	1	0	1	1	1	0	463.706	0	0	0	0
3	2	3	231	53	2	5	0	0	0	0	0	0	0	0	0	0
3	2	3	232	54	5	2	1	0	1	1	0	611.15	0	0	0	0
3	2	3	233	55	3	4	0	0	0	0	0	0	0	0	0	0
3	2	3	234	56	4	6	0	0	0	0	0	0	0	0	0	0
3	2	3	235	57	1	3	0	1	1	1	0	513.22	0	0	0	0
3	2	3	236	58	5	1	0	0	0	0	0	0	0	0	0	0
3	2	3	237	59	6	5	1	0	1	1	0	452.645	0	0	0	0
3	2	3	238	60	2	2	0	0	0	0	0	0	0	0	0	0
3	2	3	239	61	5	4	0	0	0	0	0	0	0	0	0	0
3	2	3	240	62	3	6	0	0	0	0	0	0	0	0	0	0
3	2	3	241	63	4	3	0	0	0	0	0	0	0	0	0	0
3	2	3	242	64	1	1	1	0	1	1	0	710.168	0	0	0	0
3	2	3	243	65	5	5	0	0	0	0	0	0	0	0	0	0
3	2	3	244	66	6	2	0	0	0	0	0	0	0	0	0	0
3	2	3	245	67	2	4	0	0	0	0	0	0	0	0	0	0
3	2	3	246	68	4	3	0	0	0	0	0	0	0	0	0	0
3	2	3	247	69	1	1	0	0	0	0	0	0	0	0	0	0
3	2	3	248	70	5	5	0	0	0	0	0	0	0	0	0	0
3	2	3	249	71	6	2	0	0	0	0	0	0	0	0	0	0
3	2	3	250	72	2	4	0	1	1	1	0	581.885	0	0	0	0
3	2	3	251	73	5	6	1	0	1	0	1	0	1	0	1	0
3	2	3	252	74	3	3	0	0	0	0	0	0	0	0	0	0
3	2	3	253	75	4	1	1	0	1	1	0	873.068	0	0	0	0
3	2	3	254	76	1	5	0	0	0	0	0	0	0	0	0	0
3	2	3	255	77	5	2	0	0	0	0	0	0	0	0	0	0
3	2	3	256	78	6	4	0	0	0	0	0	0	0	0	0	0
3	2	3	257	79	2	6	1	0	1	1	0	640.78	0	0	0	0
3	2	3	258	80	5	3	0	0	0	0	0	0	0	0	0	0
3	2	3	259	81	3	1	1	0	1	1	0	596.595	0	0	0	0
3	2	3	260	82	4	5	0	0	0	0	0	0	0	0	0	0
3	2	3	261	83	1	2	0	1	1	1	0	456.739	0	0	0	0
3	2	3	262	84	5	4	0	0	0	0	0	0	0	0	0	0
3	2	3	263	85	6	6	0	0	0	0	0	0	0	0	0	0
3	2	3	264	86	2	3	0	0	0	0	0	0	0	0	0	0
3	2	3	265	87	5	1	0	1	1	1	0	496.374	0	0	0	0
3	2	3	266	88	3	5	0	0	0	0	0	0	0	0	0	0
3	2	3	267	89	4	2	0	0	0	0	0	0	0	0	0	0
3	2	4	268	1	2	3	0	1	1	1	0	600.94	0	0	0	0
3	2	4	269	2	5	1	0	0	0	0	0	0	0	0	0	0
3	2	4	270	3	3	5	1	0	1	1	0	524.387	0	0	0	0
3	2	4	271	4	4	2	0	0	0	0	0	0	0	0	0	0
3	2	4	272	5	1	4	0	0	0	0	0	0	0	0	0	0
3	2	4	273	6	5	6	0	0	0	0	0	0	0	0	0	0
3	2	4	274	7	6	3	1	0	1	1	0	483.962	0	0	0	0
3	2	4	275	8	2	1	0	0	0	0	0	0	0	0	0	0
3	2	4	276	9	5	5	0	0	0	0	0	0	0	0	0	0
3	2	4	277	10	3	2	0	0	0	0	0	0	0	0	0	0
3	2	4	278	11	4	4	0	0	0	0	0	0	0	0	0	0
3	2	4	279	12	1	6	1	0	1	1	0	533.536	0	0	0	0
3	2	4	280	13	5	3	0	0	0	0	0	0	0	0	0	0
3	2	4	281	14	6	1	0	0	0	0	0	0	0	0	0	0
3	2	4	282	15	2	5	0	0	0	0	0	0	0	0	0	0
3	2	4	283	16	5	2	0	1	1	1	0	509.514	0	0	0	0
3	2	4	284	17	3	4	0	0	0	0	0	0	0	0	0	0
3	2	4	285	18	4	6	1	0	1	1	0	464.961	0	0	0	0
3	2	4	286	19	1	3	0	0	0	0	0	0	0	0	0	0
3	2	4	287	20	5	1	0	0	0	0	0	0	0	0	0	0
3	2	4	288	21	6	5	1	0	1	1	0	414.688	0	0	0	0
3	2	4	289	22	2	2	0	0	0	0	0	0	0	0	0	0
3	2	4	290	23	5	4	0	0	0	0	0	0	0	0	0	0
3	2	4	291	24	3	6	0	0	0	0	0	0	0	0	0	0
3	2	4	292	25	4	3	0	0	0	0	0	0	0	0	0	0
3	2	4	293	26	1	1	1	0	1	1	0	512.242	0	0	0	0
3	2	4	294	27	5	5	0	0	0	0	0	0	0	0	0	0
3	2	4	295	28	6	2	0	0	0	0	0	0	0	0	0	0
3	2	4	296	29	2	4	0	0	0	0	0	0	0	0	0	0
3	2	4	297	30	5	6	0	1	1	1	0	472.266	0	0	0	0
3	2	4	298	31	3	3	0	0	0	0	0	0	0	0	0	0
3	2	4	299	32	4	1	0	0	0	0	0	0	0	0	0	0
3	2	4	300	33	1	5	0	0	0	0	0	0	0	0	0	0
3	2	4	301	34	5	2	0	0	0	0	0	0	0	0	0	0
3	2	4	302	35	5	6	0	1	1	1	0	729.817	0	0	0	0
3	2	4	303	36	3	3	0	0	0	0	0	0	0	0	0	0
3	2	4	304	37	4	1	0	0	0	0	0	0	0	0	0	0
3	2	4	305	38	1	5	0	0	0	0	0	0	0	0	0	0
3	2	4	306	39	5	2	0	0	0	0	0	0	0	0	0	0
3	2	4	307	40	6	4	0	0	0	0	0	0	0	0	0	0
3	2	4	308	41	2	6	0	0	0	0	0	0	0	0	0	0
3	2	4	309	42	5	3	0	1	1	1	0	639.148	0	0	0	0
3	2	4	310	43	3	1	0	0	0	0	0	0	0	0	0	0
3	2	4	311	44	4	5	0	0	0	0	0	0	0	0	0	0
3	2	4	312	45	1	2	1	0	1	1	0	524.423	0	0	0	0
3	2	4	313	46	5	4	0	0	0	0	0	0	0	0	0	0
3	2	4	314	47	6	6	1	0	1	1	0	448.246	0	0	0	0
3	2	4	315	48	2	3	0	1	1	1	0	522.606	0	0	0	0
3	2	4	316	49	5	1	0	0	0	0	0	0	0	0	0	0
3	2	4	317	50	3	5	1	0	1	1	0	429.94	0	0	0	0
3	2	4	318	51	4	2	0	0	0	0	0	0	0	0	0	0
3	2	4	319	52	1	4	0	0	0	1	1	385.777	0	1	0	0
3	2	4	320	53	5	6	0	1	1	1	0	530.052	0	0	0	0
3	2	4	321	54	6	3	0	0	0	0	0	0	0	0	0	0
3	2	4	322	55	2	1	0	0	0	0	0	0	0	0	0	0
3	2	4	323	56	5	5	1	0	1	0	1	0	1	0	1	0
3	2	4	324	57	3	2	1	0	1	1	0	495.28	0	0	0	0
3	2	4	325	58	4	4	0	0	0	0	0	0	0	0	0	0
3	2	4	326	59	1	6	0	0	0	0	0	0	0	0	0	0
3	2	4	327	60	5	3	0	1	1	1	0	445.364	0	0	0	0
3	2	4	328	61	6	1	0	0	0	0	0	0	0	0	0	0
3	2	4	329	62	2	5	0	0	0	0	0	0	0	0	0	0
3	2	4	330	63	5	2	0	1	1	1	0	491.103	0	0	0	0
3	2	4	331	64	3	4	0	0	0	0	0	0	0	0	0	0
3	2	4	332	65	4	6	1	0	1	1	0	414.506	0	0	0	0
3	2	4	333	66	1	3	0	0	0	0	0	0	0	0	0	0
3	2	4	334	67	5	1	0	0	0	0	0	0	0	0	0	0
3	2	4	335	68	6	5	0	0	0	0	0	0	0	0	0	0
3	2	4	336	69	2	2	0	0	0	0	0	0	0	0	0	0
3	2	4	337	70	5	4	0	1	1	1	0	448.446	0	0	0	0
3	2	4	338	71	3	6	0	0	0	0	0	0	0	0	0	0
3	2	4	339	72	4	3	0	0	0	0	0	0	0	0	0	0
3	2	4	340	73	1	1	0	0	0	0	0	0	0	0	0	0
3	2	4	341	74	5	5	1	0	1	1	0	519.652	0	0	0	0
3	2	4	342	75	6	2	1	0	1	1	0	529.583	0	0	0	0
3	2	4	343	76	2	4	0	0	0	0	0	0	0	0	0	0
3	2	4	344	77	5	6	0	1	1	1	0	469.757	0	0	0	0
3	2	4	345	78	3	3	0	0	0	0	0	0	0	0	0	0
3	2	4	346	79	4	1	0	1	1	1	0	441.55	0	0	0	0
3	2	4	347	80	1	5	0	0	0	0	0	0	0	0	0	0
3	2	4	348	81	5	2	0	0	0	0	0	0	0	0	0	0
3	2	4	349	82	6	4	0	0	0	0	0	0	0	0	0	0
3	2	4	350	83	2	6	1	0	1	0	1	0	1	0	1	0
3	2	4	351	84	5	3	0	0	0	0	0	0	0	0	0	0
3	2	4	352	85	3	1	0	0	0	0	0	0	0	0	0	0
3	2	4	353	86	4	5	0	1	1	1	0	500.893	0	0	0	0
3	2	4	354	87	1	2	1	0	1	0	1	0	1	0	1	0
3	2	4	355	88	5	4	0	0	0	0	0	0	0	0	0	0
3	2	4	356	89	6	6	0	0	0	0	0	0	0	0	0	0
3	2	5	357	1	4	3	0	0	0	0	0	0	0	0	0	0
3	2	5	358	2	1	1	1	0	1	0	1	0	1	0	1	0
3	2	5	359	3	5	5	0	0	0	0	0	0	0	0	0	0
3	2	5	360	4	6	2	0	0	0	0	0	0	0	0	0	0
3	2	5	361	5	2	4	0	0	0	0	0	0	0	0	0	0
3	2	5	362	6	5	6	0	0	0	0	0	0	0	0	0	0
3	2	5	363	7	3	3	0	1	1	1	0	465.935	0	0	0	0
3	2	5	364	8	4	1	0	0	0	0	0	0	0	0	0	0
3	2	5	365	9	1	5	0	0	0	0	0	0	0	0	0	0
3	2	5	366	10	5	2	0	0	0	0	0	0	0	0	0	0
3	2	5	367	11	6	4	0	1	1	1	0	521.575	0	0	0	0
3	2	5	368	12	2	6	0	0	0	0	0	0	0	0	0	0
3	2	5	369	13	5	3	0	0	0	0	0	0	0	0	0	0
3	2	5	370	14	3	1	0	0	0	0	0	0	0	0	0	0
3	2	5	371	15	4	5	0	1	1	1	0	497.145	0	0	0	0
3	2	5	372	16	6	4	0	0	0	0	0	0	0	0	0	0
3	2	5	373	17	2	6	1	0	1	1	0	484.554	0	0	0	0
3	2	5	374	18	5	3	0	0	0	0	0	0	0	0	0	0
3	2	5	375	19	3	1	0	0	0	0	0	0	0	0	0	0
3	2	5	376	20	4	5	1	0	1	1	0	514.301	0	0	0	0
3	2	5	377	21	1	2	0	1	1	1	0	524.572	0	0	0	0
3	2	5	378	22	5	4	0	1	1	1	0	550.474	0	0	0	0
3	2	5	379	23	6	6	0	0	0	0	0	0	0	0	0	0
3	2	5	380	24	2	3	0	0	0	0	0	0	0	0	0	0
3	2	5	381	25	5	1	0	1	1	1	0	468.269	0	0	0	0
3	2	5	382	26	3	5	0	0	0	0	0	0	0	0	0	0
3	2	5	383	27	4	2	0	0	0	0	0	0	0	0	0	0
3	2	5	384	28	1	4	0	0	0	0	0	0	0	0	0	0
3	2	5	385	29	5	6	1	0	1	1	0	539.443	0	0	0	0
3	2	5	386	30	6	3	1	0	1	1	0	405.367	0	0	0	0
3	2	5	387	31	2	1	0	1	1	1	0	543.655	0	0	0	0
3	2	5	388	32	5	5	0	0	0	0	0	0	0	0	0	0
3	2	5	389	33	3	2	1	0	1	1	0	499.081	0	0	0	0
3	2	5	390	34	4	4	0	0	0	0	0	0	0	0	0	0
3	2	5	391	35	1	6	0	0	0	0	0	0	0	0	0	0
3	2	5	392	36	5	3	0	1	1	1	0	465.146	0	0	0	0
3	2	5	393	37	6	1	0	0	0	0	0	0	0	0	0	0
3	2	5	394	38	2	5	0	0	0	0	0	0	0	0	0	0
3	2	5	395	39	5	2	0	0	0	0	0	0	0	0	0	0
3	2	5	396	40	3	4	0	1	1	1	0	712.834	0	0	0	0
3	2	5	397	41	4	6	0	0	0	0	0	0	0	0	0	0
3	2	5	398	42	1	3	1	0	1	0	1	0	1	0	1	0
3	2	5	399	43	5	1	0	0	0	0	0	0	0	0	0	0
3	2	5	400	44	6	5	0	0	0	0	0	0	0	0	0	0
3	2	5	401	45	2	2	0	0	0	0	0	0	0	0	0	0
3	2	5	402	46	5	4	0	0	0	0	0	0	0	0	0	0
3	2	5	403	47	3	6	1	0	1	1	0	467.706	0	0	0	0
3	2	5	404	48	4	3	0	0	0	0	0	0	0	0	0	0
3	2	5	405	49	1	1	0	0	0	0	0	0	0	0	0	0
3	2	5	406	50	5	5	0	0	0	0	0	0	0	0	0	0
3	2	5	407	51	6	2	1	0	1	1	0	395.29	0	0	0	0
3	2	5	408	52	2	4	0	0	0	0	0	0	0	0	0	0
3	2	5	409	53	5	6	0	0	0	0	0	0	0	0	0	0
3	2	5	410	54	3	3	1	0	1	1	0	505.016	0	0	0	0
3	2	5	411	55	4	1	0	1	1	1	0	595.367	0	0	0	0
3	2	5	412	56	1	5	0	0	0	0	0	0	0	0	0	0
3	2	5	413	57	5	2	0	0	0	0	0	0	0	0	0	0
3	2	5	414	58	6	4	0	1	1	1	0	561.04	0	0	0	0
3	2	5	415	59	2	6	0	0	0	0	0	0	0	0	0	0
3	2	5	416	60	5	3	0	0	0	0	0	0	0	0	0	0
3	2	5	417	61	3	1	1	0	1	1	0	558.358	0	0	0	0
3	2	5	418	62	4	5	0	0	0	0	0	0	0	0	0	0
3	2	5	419	63	1	2	0	1	1	1	0	594.599	0	0	0	0
3	2	5	420	64	5	4	1	0	1	0	1	0	1	0	1	0
3	2	5	421	65	6	6	0	0	0	0	0	0	0	0	0	0
3	2	5	422	66	2	3	0	0	0	0	0	0	0	0	0	0
3	2	5	423	67	5	1	0	0	0	0	0	0	0	0	0	0
3	2	5	424	68	3	5	1	0	1	1	0	393.707	0	0	0	0
3	2	5	425	69	4	2	0	0	0	0	0	0	0	0	0	0
3	2	5	426	70	1	4	0	0	0	0	0	0	0	0	0	0
3	2	5	427	71	5	6	0	0	0	0	0	0	0	0	0	0
3	2	5	428	72	6	3	0	0	0	0	0	0	0	0	0	0
3	2	5	429	73	2	1	1	0	1	1	0	459.181	0	0	0	0
3	2	5	430	74	5	5	0	0	0	0	0	0	0	0	0	0
3	2	5	431	75	3	2	0	1	1	1	0	543.428	0	0	0	0
3	2	5	432	76	4	4	0	0	0	0	0	0	0	0	0	0
3	2	5	433	77	1	6	0	0	0	0	0	0	0	0	0	0
3	2	5	434	78	5	3	0	0	0	0	0	0	0	0	0	0
3	2	5	435	79	6	1	0	1	1	1	0	727.06	0	0	0	0
3	2	5	436	80	2	5	0	0	0	0	0	0	0	0	0	0
3	2	5	437	81	5	2	1	0	1	1	0	490.47	0	0	0	0
3	2	5	438	82	3	4	0	0	0	0	0	0	0	0	0	0
3	2	5	439	83	4	6	0	0	0	0	0	0	0	0	0	0
3	2	5	440	84	1	3	0	0	0	0	0	0	0	0	0	0
3	2	5	441	85	5	1	0	0	0	0	0	0	0	0	0	0
3	2	5	442	86	6	5	0	1	1	1	0	604.351	0	0	0	0
3	2	5	443	87	2	2	0	0	0	0	0	0	0	0	0	0
3	2	5	444	88	5	4	0	0	0	0	0	0	0	0	0	0
3	2	5	445	89	3	6	0	0	0	0	0	0	0	0	0	0
3	2	6	446	1	6	1	1	0	1	1	0	752.154	0	0	0	0
3	2	6	447	2	2	5	0	0	0	0	0	0	0	0	0	0
3	2	6	448	3	5	2	0	0	0	0	0	0	0	0	0	0
3	2	6	449	4	3	4	0	0	0	0	0	0	0	0	0	0
3	2	6	450	5	4	6	0	0	0	0	0	0	0	0	0	0
3	2	6	451	6	1	3	1	0	1	1	0	673.683	0	0	0	0
3	2	6	452	7	5	1	0	0	0	0	0	0	0	0	0	0
3	2	6	453	8	6	5	0	0	0	0	0	0	0	0	0	0
3	2	6	454	9	2	2	0	1	1	1	0	479.815	0	0	0	0
3	2	6	455	10	5	4	1	0	1	0	1	0	1	0	1	0
3	2	6	456	11	3	6	0	0	0	0	0	0	0	0	0	0
3	2	6	457	12	4	3	0	0	0	0	0	0	0	0	0	0
3	2	6	458	13	1	1	0	0	0	0	0	0	0	0	0	0
3	2	6	459	14	5	5	0	0	0	0	0	0	0	0	0	0
3	2	6	460	15	6	2	1	0	1	1	0	496.788	0	0	0	0
3	2	6	461	16	2	4	0	0	0	0	0	0	0	0	0	0
3	2	6	462	17	5	6	0	0	0	0	0	0	0	0	0	0
3	2	6	463	18	3	3	0	1	1	1	0	542.808	0	0	0	0
3	2	6	464	19	4	1	0	0	0	0	0	0	0	0	0	0
3	2	6	465	20	1	5	0	0	0	0	0	0	0	0	0	0
3	2	6	466	21	5	2	0	0	0	0	0	0	0	0	0	0
3	2	6	467	22	6	4	0	0	0	0	0	0	0	0	0	0
3	2	6	468	23	2	6	1	0	1	0	1	0	1	0	1	0
3	2	6	469	24	5	3	0	0	0	0	0	0	0	0	0	0
3	2	6	470	25	3	1	0	0	0	0	0	0	0	0	0	0
3	2	6	471	26	4	5	0	0	0	0	0	0	0	0	0	0
3	2	6	472	27	1	2	0	0	0	0	0	0	0	0	0	0
3	2	6	473	28	5	4	0	1	1	1	0	583.779	0	0	0	0
3	2	6	474	29	6	6	0	0	0	0	0	0	0	0	0	0
3	2	6	475	30	2	3	0	0	0	0	0	0	0	0	0	0
3	2	6	476	31	5	1	1	0	1	0	1	0	1	0	1	0
3	2	6	477	32	1	2	0	0	0	0	0	0	0	0	0	0
3	2	6	478	33	5	4	0	0	0	0	0	0	0	0	0	0
3	2	6	479	34	6	6	0	1	1	1	0	521.198	0	0	0	0
3	2	6	480	35	2	3	0	0	0	0	0	0	0	0	0	0
3	2	6	481	36	5	1	0	0	0	0	0	0	0	0	0	0
3	2	6	482	37	3	5	1	0	1	1	0	534.465	0	0	0	0
3	2	6	483	38	4	2	0	0	0	0	0	0	0	0	0	0
3	2	6	484	39	1	4	0	0	0	0	0	0	0	0	0	0
3	2	6	485	40	5	6	1	0	1	1	0	580.209	0	0	0	0
3	2	6	486	41	6	3	0	0	0	0	0	0	0	0	0	0
3	2	6	487	42	2	1	0	0	0	0	0	0	0	0	0	0
3	2	6	488	43	5	5	0	1	1	1	0	530.354	0	0	0	0
3	2	6	489	44	3	2	0	0	0	0	0	0	0	0	0	0
3	2	6	490	45	4	4	0	1	1	1	0	518.2	0	0	0	0
3	2	6	491	46	1	6	0	0	0	0	0	0	0	0	0	0
3	2	6	492	47	5	3	0	0	0	0	0	0	0	0	0	0
3	2	6	493	48	6	1	0	1	1	1	0	467.864	0	0	0	0
3	2	6	494	49	2	5	1	0	1	1	0	541.394	0	0	0	0
3	2	6	495	50	5	2	1	0	1	1	0	711.33	0	0	0	0
3	2	6	496	51	3	4	0	0	0	0	0	0	0	0	0	0
3	2	6	497	52	4	6	0	1	1	1	0	507.639	0	0	0	0
3	2	6	498	53	1	3	0	0	0	0	0	0	0	0	0	0
3	2	6	499	54	5	1	0	0	0	1	1	1667.43	0	1	0	0
3	2	6	500	55	6	5	0	0	0	0	0	0	0	0	0	0
3	2	6	501	56	2	2	0	0	0	0	0	0	0	0	0	0
3	2	6	502	57	5	4	0	1	1	1	0	675.058	0	0	0	0
3	2	6	503	58	3	6	1	0	1	1	0	588.503	0	0	0	0
3	2	6	504	59	4	3	0	0	0	0	0	0	0	0	0	0
3	2	6	505	60	1	1	0	0	0	0	0	0	0	0	0	0
3	2	6	506	61	5	5	0	0	0	0	0	0	0	0	0	0
3	2	6	507	62	6	2	1	0	1	1	0	484.186	0	0	0	0
3	2	6	508	63	2	4	0	0	0	0	0	0	0	0	0	0
3	2	6	509	64	5	6	0	0	0	0	0	0	0	0	0	0
3	2	6	510	65	3	3	0	1	1	1	0	594.229	0	0	0	0
3	2	6	511	66	4	1	0	0	0	0	0	0	0	0	0	0
3	2	6	512	67	1	5	0	0	0	0	0	0	0	0	0	0
3	2	6	513	68	5	2	0	1	1	0	1	0	1	0	0	1
3	2	6	514	69	6	4	0	0	0	0	0	0	0	0	0	0
3	2	6	515	70	2	6	0	0	0	0	0	0	0	0	0	0
3	2	6	516	71	5	3	1	0	1	0	1	0	1	0	1	0
3	2	6	517	72	3	1	0	0	0	0	0	0	0	0	0	0
3	2	6	518	73	4	5	0	0	0	0	0	0	0	0	0	0
3	2	6	519	74	1	2	0	1	1	1	0	535.27	0	0	0	0
3	2	6	520	75	5	4	0	0	0	0	0	0	0	0	0	0
3	2	6	521	76	6	6	1	0	1	1	0	490.716	0	0	0	0
3	2	6	522	77	2	3	0	0	0	0	0	0	0	0	0	0
3	2	6	523	78	5	1	0	1	1	1	0	670.937	0	0	0	0
3	2	6	524	79	3	5	0	0	0	1	1	776.399	0	1	0	0
3	2	6	525	80	4	2	1	0	1	1	0	664.242	0	0	0	0
3	2	6	526	81	1	4	0	0	0	0	0	0	0	0	0	0
3	2	6	527	82	5	6	0	1	1	1	0	908.512	0	0	0	0
3	2	6	528	83	6	3	0	0	0	0	0	0	0	0	0	0
3	2	6	529	84	2	1	0	0	0	0	0	0	0	0	0	0
3	2	6	530	85	5	5	0	1	1	0	1	0	1	0	0	1
3	2	6	531	86	3	2	0	0	0	0	0	0	0	0	0	0
3	2	6	532	87	4	4	0	1	1	1	0	483.986	0	0	0	0
3	2	6	533	88	1	6	0	0	0	0	0	0	0	0	0	0
3	2	6	534	89	5	3	0	0	0	0	0	0	0	0	0	0
3	2	7	535	1	5	5	0	0	0	0	0	0	0	0	0	0
3	2	7	536	2	3	2	0	0	0	0	0	0	0	0	0	0
3	2	7	537	3	4	4	0	0	0	0	0	0	0	0	0	0
3	2	7	538	4	1	6	0	0	0	0	0	0	0	0	0	0
3	2	7	539	5	5	3	0	0	0	0	0	0	0	0	0	0
3	2	7	540	6	6	1	0	0	0	0	0	0	0	0	0	0
3	2	7	541	7	2	5	0	0	0	0	0	0	0	0	0	0
3	2	7	542	8	5	2	0	1	1	1	0	518.045	0	0	0	0
3	2	7	543	9	3	4	0	0	0	0	0	0	0	0	0	0
3	2	7	544	10	4	6	1	0	1	1	0	633.427	0	0	0	0
3	2	7	545	11	1	3	0	1	1	1	0	675.79	0	0	0	0
3	2	7	546	12	5	1	0	0	0	0	0	0	0	0	0	0
3	2	7	547	13	6	5	0	0	0	0	0	0	0	0	0	0
3	2	7	548	14	2	2	0	0	0	0	0	0	0	0	0	0
3	2	7	549	15	5	4	1	0	1	1	0	698.944	0	0	0	0
3	2	7	550	16	3	6	0	0	0	0	0	0	0	0	0	0
3	2	7	551	17	4	3	1	0	1	1	0	462.777	0	0	0	0
3	2	7	552	18	1	1	0	0	0	0	0	0	0	0	0	0
3	2	7	553	19	5	5	0	0	0	0	0	0	0	0	0	0
3	2	7	554	20	6	2	0	0	0	0	0	0	0	0	0	0
3	2	7	555	21	2	4	0	0	0	0	0	0	0	0	0	0
3	2	7	556	22	5	6	0	1	1	1	0	768.77	0	0	0	0
3	2	7	557	23	3	3	0	0	0	0	0	0	0	0	0	0
3	2	7	558	24	4	1	1	0	1	0	1	0	1	0	1	0
3	2	7	559	25	1	5	0	0	0	0	0	0	0	0	0	0
3	2	7	560	26	5	2	0	0	0	0	0	0	0	0	0	0
3	2	7	561	27	6	4	0	0	0	0	0	0	0	0	0	0
3	2	7	562	28	2	6	0	0	0	0	0	0	0	0	0	0
3	2	7	563	29	5	3	1	0	1	0	1	0	1	0	1	0
3	2	7	564	30	3	1	0	0	0	0	0	0	0	0	0	0
3	2	7	565	31	4	5	0	0	0	0	0	0	0	0	0	0
3	2	7	566	32	1	2	0	1	1	1	0	591.682	0	0	0	0
3	2	7	567	33	5	4	0	0	0	0	0	0	0	0	0	0
3	2	7	568	34	6	6	0	1	1	1	0	1043.49	0	0	0	0
3	2	7	569	35	2	3	1	0	1	1	0	461.067	0	0	0	0
3	2	7	570	36	5	1	0	0	0	0	0	0	0	0	0	0
3	2	7	571	37	3	5	0	0	0	0	0	0	0	0	0	0
3	2	7	572	38	4	2	0	1	1	1	0	491.133	0	0	0	0
3	2	7	573	39	1	4	0	0	0	0	0	0	0	0	0	0
3	2	7	574	40	5	6	0	0	0	0	0	0	0	0	0	0
3	2	7	575	41	6	3	0	0	0	0	0	0	0	0	0	0
3	2	7	576	42	2	1	0	0	0	0	0	0	0	0	0	0
3	2	7	577	43	5	5	0	1	1	1	0	492.747	0	0	0	0
3	2	7	578	44	3	2	0	0	0	0	0	0	0	0	0	0
3	2	7	579	45	4	4	0	0	0	0	0	0	0	0	0	0
3	2	7	580	46	1	6	0	1	1	1	0	698.375	0	0	0	0
3	2	7	581	47	5	3	0	0	0	0	0	0	0	0	0	0
3	2	7	582	48	6	1	0	0	0	0	0	0	0	0	0	0
3	2	7	583	49	2	5	0	1	1	1	0	488.099	0	0	0	0
3	2	7	584	50	5	2	0	0	0	0	0	0	0	0	0	0
3	2	7	585	51	3	4	0	0	0	1	1	1371.45	0	1	0	0
3	2	7	586	52	4	6	0	0	0	0	0	0	0	0	0	0
3	2	7	587	53	1	3	0	0	0	0	0	0	0	0	0	0
3	2	7	588	54	5	1	1	0	1	0	1	0	1	0	1	0
3	2	7	589	55	6	5	0	0	0	0	0	0	0	0	0	0
3	2	7	590	56	2	2	0	1	1	1	0	713.392	0	0	0	0
3	2	7	591	57	5	4	0	0	0	0	0	0	0	0	0	0
3	2	7	592	58	3	6	1	0	1	1	0	652.8	0	0	0	0
3	2	7	593	59	4	3	0	0	0	1	1	1993.86	0	1	0	0
3	2	7	594	60	1	1	0	0	0	1	1	264.628	0	1	0	0
3	2	7	595	61	5	5	0	0	0	0	0	0	0	0	0	0
3	2	7	596	62	6	2	0	0	0	0	0	0	0	0	0	0
3	2	7	597	63	2	4	0	1	1	1	0	986.647	0	0	0	0
3	2	7	598	64	5	6	1	0	1	0	1	0	1	0	1	0
3	2	7	599	65	3	3	0	0	0	0	0	0	0	0	0	0
3	2	7	600	66	4	1	0	0	0	0	0	0	0	0	0	0
3	2	7	601	67	1	5	0	1	1	1	0	440.256	0	0	0	0
3	2	7	602	68	5	2	0	0	0	0	0	0	0	0	0	0
3	2	7	603	69	6	4	0	0	0	1	1	1003.62	0	1	0	0
3	2	7	604	70	2	6	0	0	0	0	0	0	0	0	0	0
3	2	7	605	71	5	3	0	1	1	1	0	485.781	0	0	0	0
3	2	7	606	72	3	1	0	0	0	0	0	0	0	0	0	0
3	2	7	607	73	4	5	0	0	0	0	0	0	0	0	0	0
3	2	7	608	74	1	2	1	0	1	0	1	0	1	0	1	0
3	2	7	609	75	5	4	0	0	0	0	0	0	0	0	0	0
3	2	7	610	76	6	6	0	0	0	0	0	0	0	0	0	0
3	2	7	611	77	2	3	0	0	0	0	0	0	0	0	0	0
3	2	7	612	78	5	1	0	1	1	1	0	481.172	0	0	0	0
3	2	7	613	79	3	5	1	0	1	1	0	474.633	0	0	0	0
3	2	7	614	80	4	2	0	0	0	0	0	0	0	0	0	0
3	2	7	615	81	1	4	0	0	0	0	0	0	0	0	0	0
3	2	7	616	82	5	6	0	0	0	0	0	0	0	0	0	0
3	2	7	617	83	6	3	0	0	0	0	0	0	0	0	0	0
3	2	7	618	84	3	5	0	1	1	0	1	0	1	0	0	1
3	2	7	619	85	4	2	0	0	0	0	0	0	0	0	0	0
3	2	7	620	86	1	4	0	0	0	0	0	0	0	0	0	0
3	2	7	621	87	5	6	0	0	0	0	0	0	0	0	0	0
3	2	7	622	88	6	3	0	0	0	0	0	0	0	0	0	0
3	2	7	623	89	2	1	1	0	1	0	1	0	1	0	1	0
4	2	1	1	1	1	2	0	0	0	0	0	0	0	0	0	0
4	2	1	2	2	5	5	1	0	1	0	1	0	1	0	1	0
4	2	1	3	3	2	3	0	0	0	1	1	739.939	0	1	0	0
4	2	1	4	4	4	4	0	0	0	0	0	0	0	0	0	0
4	2	1	5	5	6	1	0	0	0	0	0	0	0	0	0	0
4	2	1	6	6	3	5	0	1	1	1	0	772.586	0	0	0	0
4	2	1	7	7	1	6	0	0	0	0	0	0	0	0	0	0
4	2	1	8	8	5	2	0	0	0	0	0	0	0	0	0	0
4	2	1	9	9	2	5	0	0	0	0	0	0	0	0	0	0
4	2	1	10	10	4	3	1	0	1	1	0	421.366	0	0	0	0
4	2	1	11	11	6	4	0	0	0	0	0	0	0	0	0	0
4	2	1	12	12	3	1	0	0	0	0	0	0	0	0	0	0
4	2	1	13	13	1	5	0	0	0	0	0	0	0	0	0	0
4	2	1	14	14	5	6	0	0	0	0	0	0	0	0	0	0
4	2	1	15	15	2	2	0	1	1	1	0	613.458	0	0	0	0
4	2	1	16	16	4	5	0	0	0	0	0	0	0	0	0	0
4	2	1	17	17	6	3	0	0	0	0	0	0	0	0	0	0
4	2	1	18	18	3	4	0	0	0	0	0	0	0	0	0	0
4	2	1	19	19	1	1	1	0	1	1	0	456.148	0	0	0	0
4	2	1	20	20	5	5	0	0	0	0	0	0	0	0	0	0
4	2	1	21	21	2	6	0	1	1	1	0	496.881	0	0	0	0
4	2	1	22	22	4	2	0	0	0	0	0	0	0	0	0	0
4	2	1	23	23	6	5	1	0	1	1	0	391.625	0	0	0	0
4	2	1	24	24	3	3	0	0	0	0	0	0	0	0	0	0
4	2	1	25	25	1	4	0	0	0	0	0	0	0	0	0	0
4	2	1	26	26	5	1	0	1	1	1	0	458.982	0	0	0	0
4	2	1	27	27	2	5	0	0	0	0	0	0	0	0	0	0
4	2	1	28	28	4	6	1	0	1	1	0	408.161	0	0	0	0
4	2	1	29	29	6	2	0	0	0	0	0	0	0	0	0	0
4	2	1	30	30	3	5	1	0	1	1	0	425.849	0	0	0	0
4	2	1	31	31	1	3	0	1	1	1	0	562.281	0	0	0	0
4	2	1	32	32	5	4	0	0	0	0	0	0	0	0	0	0
4	2	1	33	33	2	1	0	0	0	0	0	0	0	0	0	0
4	2	1	34	34	4	5	0	0	0	0	0	0	0	0	0	0
4	2	1	35	35	6	6	0	0	0	0	0	0	0	0	0	0
4	2	1	36	36	3	2	0	1	1	1	0	383.326	0	0	0	0
4	2	1	37	37	1	5	0	0	0	0	0	0	0	0	0	0
4	2	1	38	38	5	3	0	0	0	0	0	0	0	0	0	0
4	2	1	39	39	2	4	1	0	1	1	0	404.774	0	0	0	0
4	2	1	40	40	4	1	0	0	0	0	0	0	0	0	0	0
4	2	1	41	41	6	5	1	0	1	1	0	390.347	0	0	0	0
4	2	1	42	42	3	6	0	0	0	0	0	0	0	0	0	0
4	2	1	43	43	1	2	0	0	0	0	0	0	0	0	0	0
4	2	1	44	44	5	5	1	0	1	1	0	406.423	0	0	0	0
4	2	1	45	45	2	3	0	0	0	0	0	0	0	0	0	0
4	2	1	46	46	4	4	0	0	0	0	0	0	0	0	0	0
4	2	1	47	47	6	1	0	1	1	1	0	391.711	0	0	0	0
4	2	1	48	48	3	5	0	1	1	1	0	402.719	0	0	0	0
4	2	1	49	49	1	6	0	0	0	0	0	0	0	0	0	0
4	2	1	50	50	5	2	0	1	1	1	0	505.57	0	0	0	0
4	2	1	51	51	2	5	0	0	0	0	0	0	0	0	0	0
4	2	1	52	52	4	3	0	0	0	0	0	0	0	0	0	0
4	2	1	53	53	6	4	0	0	0	0	0	0	0	0	0	0
4	2	1	54	54	3	1	1	0	1	1	0	442.056	0	0	0	0
4	2	1	55	55	5	2	0	0	0	0	0	0	0	0	0	0
4	2	1	56	56	2	5	0	0	0	0	0	0	0	0	0	0
4	2	1	57	57	4	3	0	1	1	1	0	517.932	0	0	0	0
4	2	1	58	58	6	4	0	0	0	0	0	0	0	0	0	0
4	2	1	59	59	3	1	0	0	0	0	0	0	0	0	0	0
4	2	1	60	60	1	5	0	1	1	1	0	425.465	0	0	0	0
4	2	1	61	61	5	6	0	0	0	0	0	0	0	0	0	0
4	2	1	62	62	2	2	0	0	0	0	0	0	0	0	0	0
4	2	1	63	63	4	5	0	0	0	0	0	0	0	0	0	0
4	2	1	64	64	6	3	0	1	1	1	0	425.588	0	0	0	0
4	2	1	65	65	3	4	0	0	0	0	0	0	0	0	0	0
4	2	1	66	66	1	1	0	0	0	0	0	0	0	0	0	0
4	2	1	67	67	5	5	0	0	0	0	0	0	0	0	0	0
4	2	1	68	68	2	6	0	0	0	0	0	0	0	0	0	0
4	2	1	69	69	4	2	1	0	1	1	0	420.517	0	0	0	0
4	2	1	70	70	6	5	0	1	1	1	0	531.193	0	0	0	0
4	2	1	71	71	3	3	0	0	0	0	0	0	0	0	0	0
4	2	1	72	72	1	4	0	0	0	0	0	0	0	0	0	0
4	2	1	73	73	5	1	0	0	0	0	0	0	0	0	0	0
4	2	1	74	74	2	5	0	0	0	0	0	0	0	0	0	0
4	2	1	75	75	4	6	0	1	1	1	0	460.912	0	0	0	0
4	2	1	76	76	6	2	0	0	0	0	0	0	0	0	0	0
4	2	1	77	77	3	5	0	0	0	0	0	0	0	0	0	0
4	2	1	78	78	1	3	0	0	0	0	0	0	0	0	0	0
4	2	1	79	79	5	4	0	0	0	0	0	0	0	0	0	0
4	2	1	80	80	2	1	1	0	1	1	0	546.848	0	0	0	0
4	2	1	81	81	4	5	0	0	0	0	0	0	0	0	0	0
4	2	1	82	82	6	6	0	0	0	0	0	0	0	0	0	0
4	2	1	83	83	3	2	0	0	0	0	0	0	0	0	0	0
4	2	1	84	84	1	5	1	0	1	1	0	427.338	0	0	0	0
4	2	1	85	85	5	3	0	0	0	0	0	0	0	0	0	0
4	2	1	86	86	2	4	0	0	0	0	0	0	0	0	0	0
4	2	1	87	87	4	1	0	0	0	0	0	0	0	0	0	0
4	2	1	88	88	6	5	1	0	1	1	0	407.395	0	0	0	0
4	2	1	89	89	3	6	0	0	0	0	0	0	0	0	0	0
4	2	2	90	1	6	3	0	0	0	0	0	0	0	0	0	0
4	2	2	91	2	3	4	1	0	1	1	0	879.7	0	0	0	0
4	2	2	92	3	1	1	0	0	0	0	0	0	0	0	0	0
4	2	2	93	4	5	5	0	1	1	1	0	439.941	0	0	0	0
4	2	2	94	5	2	6	0	0	0	0	0	0	0	0	0	0
4	2	2	95	6	4	2	0	0	0	0	0	0	0	0	0	0
4	2	2	96	7	6	5	1	0	1	1	0	373.077	0	0	0	0
4	2	2	97	8	3	3	0	0	0	0	0	0	0	0	0	0
4	2	2	98	9	1	4	0	1	1	1	0	396.809	0	0	0	0
4	2	2	99	10	5	1	0	0	0	0	0	0	0	0	0	0
4	2	2	100	11	2	5	0	0	0	0	0	0	0	0	0	0
4	2	2	101	12	4	6	0	0	0	0	0	0	0	0	0	0
4	2	2	102	13	6	2	0	0	0	0	0	0	0	0	0	0
4	2	2	103	14	3	5	0	0	0	0	0	0	0	0	0	0
4	2	2	104	15	1	3	1	0	1	1	0	387.335	0	0	0	0
4	2	2	105	16	5	4	0	1	1	1	0	521.269	0	0	0	0
4	2	2	106	17	2	1	0	0	0	0	0	0	0	0	0	0
4	2	2	107	18	4	5	0	1	1	1	0	436.287	0	0	0	0
4	2	2	108	19	6	6	0	0	0	0	0	0	0	0	0	0
4	2	2	109	20	3	2	0	0	0	0	0	0	0	0	0	0
4	2	2	110	21	1	5	0	0	0	0	0	0	0	0	0	0
4	2	2	111	22	5	3	0	0	0	0	0	0	0	0	0	0
4	2	2	112	23	2	4	1	0	1	1	0	473.915	0	0	0	0
4	2	2	113	24	4	1	0	0	0	0	0	0	0	0	0	0
4	2	2	114	25	6	5	0	0	0	0	0	0	0	0	0	0
4	2	2	115	26	3	6	0	0	0	0	0	0	0	0	0	0
4	2	2	116	27	1	2	1	0	1	1	0	556.527	0	0	0	0
4	2	2	117	28	5	5	0	0	0	0	0	0	0	0	0	0
4	2	2	118	29	2	3	0	0	0	0	0	0	0	0	0	0
4	2	2	119	30	4	4	0	0	0	0	0	0	0	0	0	0
4	2	2	120	31	6	1	0	1	1	1	0	537.247	0	0	0	0
4	2	2	121	32	3	5	0	0	0	0	0	0	0	0	0	0
4	2	2	122	33	1	6	0	0	0	0	0	0	0	0	0	0
4	2	2	123	34	5	2	1	0	1	1	0	447.567	0	0	0	0
4	2	2	124	35	2	5	0	0	0	0	0	0	0	0	0	0
4	2	2	125	36	4	3	1	0	1	1	0	445.447	0	0	0	0
4	2	2	126	37	6	4	0	0	0	0	0	0	0	0	0	0
4	2	2	127	38	3	1	0	1	1	1	0	406.578	0	0	0	0
4	2	2	128	39	1	5	0	0	0	0	0	0	0	0	0	0
4	2	2	129	40	5	6	0	0	0	0	0	0	0	0	0	0
4	2	2	130	41	2	2	0	0	0	0	0	0	0	0	0	0
[truncated: 36,627 more rows]
